# Supplementary material for: Supported palladium catalyzed aminocarbonylation of aryl iodides employing bench-stable CO and NH3 surrogates
Source: Royal Society of Chemistry journal article supplement (doi:10.1039/d0ob01445a), 2020-01-01

## Supporting information

### Supported palladium catalyzed aminocarbonylation of aryl iodides employing bench-stable CO and NH<sub>3</sub> surrogates

Shaifali,<sup>[a], [b]</sup> Sheetal,<sup>[a], [b]</sup>, Rohit Bains,<sup>[a], [b]</sup> Ajay Kumar,<sup>[a], [b]</sup> Shankar Ram,<sup>[a], [b]</sup> Pralay Das\*<sup>[a], [b]</sup>

<sup>[a]</sup>Natural Product Chemistry & Process Development Division, CSIR-Institute of Himalayan Bioresource Technology, Palampur 176061, HP, India

<sup>[b]</sup>Academy of Scientific & Innovative Research, New Delhi 110025, India.

### CONTENTS

|    |                                                                                                                |       |
|----|----------------------------------------------------------------------------------------------------------------|-------|
| A. | General Method & Materials.....                                                                                | 2     |
| B. | General procedure for synthesis of compound ( <b>5</b> ) .....                                                 | 2     |
| C. | Typical experimental procedure for synthesis of primary amides and phthalimide and characterization data ..... | 3-14  |
| D. | References .....                                                                                               | 14    |
| E. | Copies of <sup>1</sup> H, <sup>13</sup> C NMR and ESI-MS spectra for the synthesized compounds.....            | 15-57 |

## A. General method and materials

High quality reagents were purchased from Sigma Aldrich, Tech Chem Solutions (TCI, India), Loba Chemie, alpha aesar and Sd Fine-chem Ltd. Thin layer chromatography was performed using pre-coated silica gel plates 60F<sub>254</sub> (Merck) in UV light detector. ESI-MS spectra were determined using a Waters micro mass Q-TOF Ultima Spectrometer. Mass spectra were recorded on electrospray ionization (ESI)quadrupole time of flight (Q-TOF) mass spectrometer. Melting points were recorded using LAB INDIA MR-VIS<sup>+</sup>. <sup>1</sup>H and <sup>13</sup>C NMR spectra were recorded using a Bruker Avance 600 spectrometer operating at 600 MHz (<sup>1</sup>H) and 150 MHz (<sup>13</sup>C) and Bruker Avance 300 spectrometer operating at 300 MHz (<sup>1</sup>H) and 75 MHz (<sup>13</sup>C). Spectra were recorded at 25 °C in DMSO-*d*<sub>6</sub> [residual DMSO ( $\delta_{\text{H}}$  2.50 and 3.42 ppm) and DMSO ( $\delta_{\text{C}}$  39.52 ppm)] with TMS as internal standard. Chemical shifts were recorded in  $\delta$  (ppm) relative to the TMS and NMR solvent signal. Coupling constants (*J*) are given in Hz and multiplicities of signals are reported as follows: s, singlet; d, doublet; t, triplet; q, quartet; m, multiplet; brs, broad singlet.

## B. Synthesis of (1H-imidazol-1-yl) (p-tolyl)methanone (5)

The benzoyl imidazole was prepared by following the literature.<sup>1</sup> In a 25 mL round bottom flask, imidazole (2 mmol) was dissolved in anhydrous CH<sub>2</sub>Cl<sub>2</sub> (2 mL). Further, benzoyl chloride (1mmol) was in added in solution of imidazole slowly and dropwise, resulting in precipitation of imidazolium chloride. The resultant mixture was allowed to stir for 2-3 h at room temperature. The reaction mixture was filtered, washed with cold water and extracted using dichloromethane as solvent. The organic layer was dried over sodium sulphate and solvent was evaporated under reduced pressure yielding crude benzoyl imidazole (5) as viscous oil. The crude was crystallized with the help of hexanes. The formation of the product was confirmed with the help of ESI-MS [M+H]<sup>+</sup> for C<sub>11</sub>H<sub>11</sub>N<sub>2</sub>O<sup>+</sup> 187.1066 and found 187.0864.

## C. Typical Experimental procedure

### 1. 4-methylbenzamide<sup>2</sup>

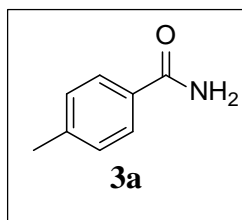

In a double vial system (inner vial is of 2mL and another which is outer is of 5mL), 4-methyl iodobenzene (0.229 mmol, 50 mg), ammonium carbamate (0.917 mmol, 69.7mg), Pd@PS (0.0069 mmol, 70 mg), TEA (0.573 mmol, 79.7  $\mu$ l), imidazole (0.172 mmol, 13 mg) and DMF (1.5 mL) were added in inner vial (2 mL) while the outer vial was charged with oxalic acid (1.37 mmol, 123.8 mg) and DMF (0.3 mL). After completion of the addition, the inner vial containing contents was placed carefully inside outer vial (5 mL) having oxalic acid. Further, the 5 mL reaction vessel tighten with the solid PTFE faced solid cap and Teflon tape. The system was further stirred in oil bath heated at 130 °C for the required time. The reaction progress was monitored by TLC and after the completion of the reaction, the inner vial was removed. The contents of the inner vial in a separatory funnel. Further, water was added in the reaction mixture and extracted with ethyl acetate. The combined organic layer was dried over anhydrous Na<sub>2</sub>SO<sub>4</sub> and concentrated under reduced pressure. The crude mixture was further purified by silica gel column chromatography using hexane:ethyl acetate (60:40) as eluent, afforded **3a** as white solid (23 mg, 75%).

<sup>1</sup>H (600MHz, DMSO-*d*6), ( $\delta$  ppm) 2.34(s, 3H), 2.34 (s, 3H), 7.245 (d, *J* = 7.98 Hz, 2H), 7.28 (brs, 1H), 7.775 (d, *J* = 8.1 Hz, 2H), 7.90 (brs, 1H).

<sup>13</sup>C (150 MHz, DMSO-*d*6),  $\delta$  (ppm) 21.40, 127.90, 129.19, 131.94, 141.51, 168.25.

The expected ESI-MS, [M+H]<sup>+</sup> for C<sub>8</sub>H<sub>10</sub>NO<sup>+</sup> was 136.0757 and observed is 136.0755.

### 2. benzamide<sup>2</sup>

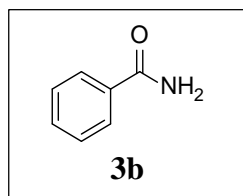

Prepared as general procedure described for **3a** from iodobenzene (0.245 mmol, 50 mg), gave after purification with silica gel column chromatography in Hexane: ethyl acetate (35:65) as elutents **3b** as white solid (19 mg, 65%).

**<sup>1</sup>H (600MHz, DMSO-*d*6), (δ ppm)** 7.37 (brs, 1H), 7.45 (t, *J* = 7.4 Hz, 2H), 7.51-7.53 (m, 1H), 7.875 (d, *J* = 15, 7.32 Hz, 2H), 7.98 (brs, 1H).

**<sup>13</sup>C (150 MHz, DMSO-*d*6), δ (ppm)** 127.90, 128.66, 131.67, 134.71, 168.34

The calculated ESI-MS+H<sup>+</sup> for C<sub>7</sub>H<sub>8</sub>NO<sup>+</sup> 122.06 and found 122.0602.

### 3-methylbenzamide<sup>2</sup>

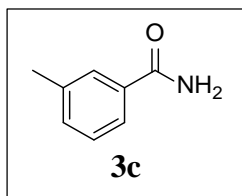

Prepared as general procedure described for **3a** from 3-iodotoluene (0.229 mmol, 50 mg), gave after purification with silica gel column chromatography in Hexane: ethyl acetate (35:65) as elutents **3c** as white solid (16 mg, 52%).

**<sup>1</sup>H (600MHz, DMSO-*d*6), (δ ppm)** 2.35 (s, 3H), 7.32 (d, *J* = 4.5 Hz, 3H), 7.65-7.67 (m, 1H), 7.70 (s, 1H), 7.93 (brs, 1H).

**<sup>13</sup>C (150 MHz, DMSO-*d*6), δ (ppm)** 21.41, 125.04, 128.52, 128.54, 132.22, 134.71, 137.88, 168.48.

The expected ESI-MS, [M+H]<sup>+</sup> for C<sub>8</sub>H<sub>10</sub>NO<sup>+</sup> was 136.0757 and observed is 136.0755

### 2-ethylbenzamide<sup>3</sup>

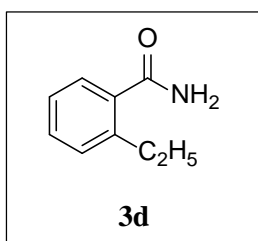

Prepared as general procedure described for **3a** from 1-ethyl 2-iodobenzene (0.215 mmol, 50 mg), gave after purification with silica gel column chromatography in Hexane: ethyl acetate (35:65) as elutents **3d** as white solid (14 mg, 45%).

**<sup>1</sup>H (600MHz, DMSO-*d*6), (δ ppm)** 1.14-1.16 (t, *J* = 7.5, 15Hz, 3H), 2.71-2.75 (q, *J* = 7.4 Hz, 2H), 7.21-7.22 (m, 1H), 7.25 (d, *J* = 7.5 Hz), 7.30-7.35 (m, 3H), 7.73 (brs, 1H).

The expected ESI-MS [M+H]<sup>+</sup> for C<sub>9</sub>H<sub>12</sub>NO<sup>+</sup> is 150.0913 and observed is 150.0912.

### 4-(*tert*-butyl)benzamide<sup>2</sup>

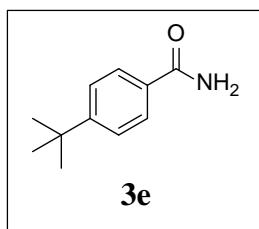

Prepared as general procedure described for **3a** from 4-*tert*-butyliodobenzene (0.192 mmol, 50 mg), gave after purification with silica gel column chromatography in Hexane: ethyl acetate (40:60) as elutents **3e** as white solid (18 mg, 53%).

**<sup>1</sup>H (600MHz, DMSO-*d*6), (δ ppm)** 1.29 (s, 9H), 7.29 (brs, 1H), 7.45-7.46 (m, 2H), 7.79-7.81 (m, 2H), 7.91 (brs, 1H).

**<sup>13</sup>C (150 MHz, DMSO-*d*6), δ (ppm)** 31.42, 35.05, 125.42, 127.78, 132.00, 154.41, 168.26.

The calculated ESI-MS[M+H]<sup>+</sup> for C<sub>11</sub>H<sub>16</sub>NO<sup>+</sup> 178.1226 and found 178.1223.

### 3, 5-dimethylbenzamide<sup>2</sup>

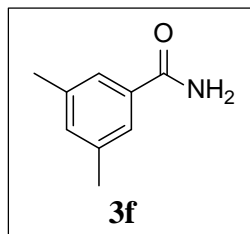

Prepared as general procedure described for **3a** from 1-iodo 3, 5 dimethylbenzene (0.215 mmol, 50 mg), gave after purification with silica gel column chromatography in Hexane: ethyl acetate (40:60) as elutents **3d** as white solid (17 mg, 54%).

**<sup>1</sup>H (600MHz, DMSO-*d*6), (δ ppm)** 2.30 (s, 6H), 7.14 (s, 1H), 7.23 (brs, 1H), 7.48 (s, 2H), 7.85 (brs, 1H).

**<sup>13</sup>C (150 MHz, DMSO-*d*6), δ (ppm)** 21.31, 125.71, 132.89, 134.75, 137.70, 168.59.

The calculated ESI-MS [M+H]<sup>+</sup> for C<sub>9</sub>H<sub>12</sub>NO<sup>+</sup> 150.0913 and found 150.0910

### 2,4-dimethylbenzamide<sup>2</sup>

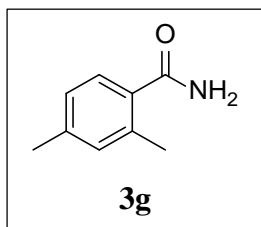

Prepared as general procedure described for **3a** from 1-iodo 3, 5 dimethylbenzene (0.215 mmol, 50 mg), gave after purification with silica gel column chromatography in Hexane: ethyl acetate (40:60) as elutents **3g** as white solid (20 mg, 63%).

**<sup>1</sup>H (600MHz, DMSO-*d*6), (δ ppm)** 2.28 (s, 3H), 2.34 (s, 3H), 7.00-7.03 (m, 2H), 7.26-7.28 (m, 2H), 7.62 (s, 1H).

**<sup>13</sup>C (150 MHz, DMSO-*d*6), δ (ppm)** 21.02, 21.20, 126.33, 127.72, 131.62, 134.43, 135.83, 139.15, 171.46.

The calculated ESI-MS [M+H]<sup>+</sup> for C<sub>9</sub>H<sub>12</sub>NO<sup>+</sup> 150.0913 and found 150.0910.

#### 4-methoxybenzamide<sup>2</sup>

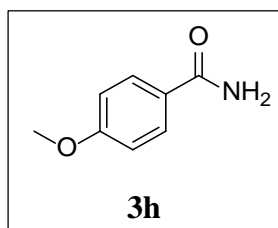

Prepared as general procedure described for **3a** from 4-iodoanisole (0.213 mmol, 50 mg), gave after purification with silica gel column chromatography in Hexane: ethyl acetate (1:1) as elutents **3h** as white solid (20 mg, 61%).

**<sup>1</sup>H (600MHz, DMSO-*d*6), (δ ppm)** 3.80 (s, 3H), 6.96-6.98 (m, 2H), 7.18 (brs, 1H), 7.84-7.86 (m, 3H).

**<sup>13</sup>C (150 MHz, DMSO-*d*6), δ (ppm)** 55.77, 113.83, 126.98, 129.80, 162.04, 167.88.

The expected ESI-[MS+H]<sup>+</sup> C<sub>8</sub>H<sub>10</sub>NO<sub>2</sub><sup>+</sup> for 152.0706 is and observed is 152.0706.

#### 3-methoxybenzamide

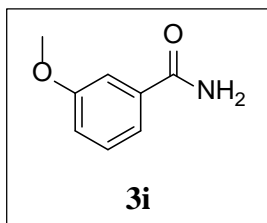

Prepared as general procedure described for **3a** from 3-iodoanisole (0.213 mmol, 50 mg), gave after purification with silica gel column chromatography in Hexane: ethyl acetate (1:1) as elutents **3i** as white solid (25mg, 77%).

**<sup>1</sup>H (600MHz, DMSO-*d*6), (δ ppm)** 3.79 (s, 3H), 7.07-7.09 (m, 1H), 7.34-7.37 (m, 2H), 7.42-7.43 (m, 1H), 7.45-7.46 (m, 1H), 7.96 (brs, 1H).

**<sup>13</sup>C (150 MHz, DMSO-*d*6), δ (ppm)** 55.68, 113.10, 117.52, 120.15, 129.78, 136.19, 159.60, 168.10.

The calculated ESI-[MS+H]<sup>+</sup> C<sub>8</sub>H<sub>10</sub>NO<sub>2</sub><sup>+</sup> for 152.0706 and found 152.0707.

#### 2-methoxybenzamide<sup>3</sup>

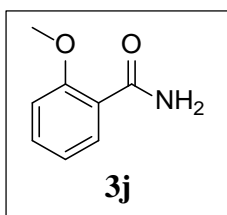

Prepared as general procedure described for **3a** from 2-iodoanisole (0.213 mmol, 50 mg), gave after purification with silica gel column chromatography in Hexane: ethyl acetate (1:1) as elutents **3j** as white solid (21mg, 65%).

**<sup>1</sup>H (600MHz, DMSO-*d*6), (δ ppm)** 3.89 (s, 3H), 7.02 (t, *J* = 7.6 Hz, 1H), 7.125 (d, *J* = 8.2 Hz, 1H), 7.46-7.48 (m, 1H), 7.52 (brs, 1H), 7.64 (brs, 1H), 7.80-7.81 (m, 1H).

**<sup>13</sup>C (150 MHz, DMSO-*d*6), δ (ppm)** 56.26, 112.43, 120.85, 123.17, 127.95, 131.91, 157.69, 167.77

The calculated ESI-[MS+H]<sup>+</sup> C<sub>8</sub>H<sub>10</sub>NO<sub>2</sub><sup>+</sup> for 152.0706 and found 152.0703.

### 3-fluorobenzamide<sup>3</sup>

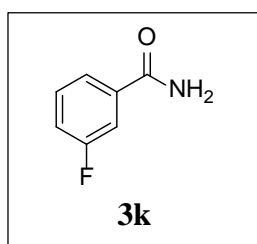

Prepared as general procedure described for **3a** from 3-Fluoriodobenzene (0.225 mmol, 50mg), gave after purification with silica gel column chromatography in Hexane: ethyl acetate (60:40) as elutents **3k** as crystalline solid (16mg, 51%).

**<sup>1</sup>H (600MHz, DMSO-*d*6), (δ ppm)** 7.37-7.38 (m, 1H), 7.49-7.52 (m, 2H), 7.64-7.67 (m, 1H), 7.72-7.73 (m, 1H), 8.05 (brs, 1H)

**<sup>13</sup>C (150 MHz, DMSO-*d*6), δ (ppm)** 119.34-119.49 (d, *J*=22.6 Hz), 123.28 (m), 128.82, 132.56-135.61 (m), 141.92-141.96 (d, *J*=6.0 Hz), 166.38-167.99 (d, *J*=241 Hz), 171.71-171.72 (d, *J*=1.5 Hz).

The calculated ESI-[M+H]<sup>+</sup> for C<sub>7</sub>H<sub>7</sub>FNO<sup>+</sup> is 140.0506 and found 140.0505.

### 2-fluorobenzamide

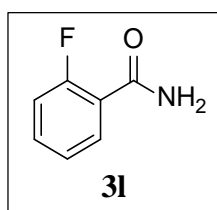

Prepared as general procedure described for **3a** from 2-Fluoriodobenzene (0.225 mmol, 50mg), gave after purification with silica gel column chromatography in Hexane: ethyl acetate (60:40) as elutents **3l** as crystalline solid (26mg, 82%).

**<sup>1</sup>H (600MHz, DMSO-*d*6), (δ ppm)** 7.25-7.28 (m, 2H), 7.51-7.53 (m, 1H), 7.64-7.67 (m, 2H), 7.71 (brs, 1H)

**<sup>13</sup>C (150 MHz, DMSO-*d*6), δ (ppm)** 116.55 (d, *J* = 22.4 Hz), 124.27-124.36 (d, *J* = 14.2 Hz), 124.85-124.88 (d, *J* = 3.4 Hz), 130.68-130.70 (d, *J* = 2.9 Hz), 132.90-132.96 (d, *J* = 8.6 Hz), 130.68-130.70 (d, *J* = 29 Hz), 159.75 (d, *J* = 3.4 Hz), 165.72.

The calculated ESI-[M+H]<sup>+</sup> for C<sub>7</sub>H<sub>7</sub>FNO<sup>+</sup> 140.0506 and found 140.0506.

### 3-fluoro-4-methylbenzamide

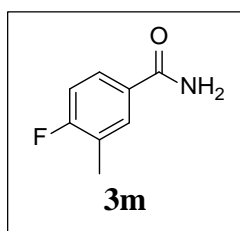

Prepared as general procedure described for **3a** from 4-Fluoro-3-iodotoluene (0.212 mmol, 50mg), gave after purification with silica gel column chromatography in Hexane: ethyl acetate (60:40) as elutents **3m** as white solid (18mg, 56%).

**<sup>1</sup>H (600MHz, DMSO-*d*6), (δ ppm)** 2.27 (s, 3H), 7.18-7.21 (t, *J* = 9.0 Hz, 1H), 7.30 (brs, 1H), 7.73-7.76 (m, 1H), 7.82-7.83 (m, 1H), 7.91 (s, 1H)

**<sup>13</sup>C (150 MHz, DMSO-*d*6), δ (ppm)** 14.62, 115.10-115.25 (d *J* = 22.4 Hz), 124.47-124.58 (d, *J* = 17.5 Hz), 127.76-127.82 (d, *J* = 8.9 Hz), 130.84-130.86 (d, *J* = 3.8 Hz), 131.75 -131.79 (d, *J*=5.7 Hz), 162.06-163.70 (d, *J* = 246 Hz), 167.40.

The calculated ESI-[MS+H]<sup>+</sup> for C<sub>8</sub>H<sub>9</sub>FNO<sup>+</sup> 154.0663 and found 154.0663.

### 4-chlorobenzamide<sup>2</sup>

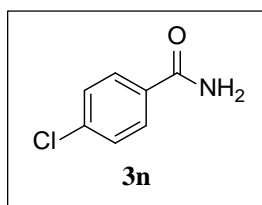

Prepared as general procedure described for **3a** from 1-Chloro-4-iodobenzene (0.210 mmol, 50mg), gave after purification with silica gel column chromatography in Hexane: ethyl acetate (60:40) as elutents **3n** as white solid (25mg, 76%).



**<sup>1</sup>H (600MHz, DMSO-*d*6), (δ ppm)** 7.46 (brs, 1H), 7.51-7.53 (m, 2H), 7.88-7.89(m, 2H), 8.04 (brs, 1H)

**<sup>13</sup>C (150 MHz, DMSO-*d*6), δ (ppm)** 128.96, 129.87, 133.51, 136.54, 167.28.

The calculated ESI-[MS+H]<sup>+</sup> for C<sub>7</sub>H<sub>7</sub>ClNO<sup>+</sup> 156.0211 and found 156.0210.

### 2-chlorobenzamide

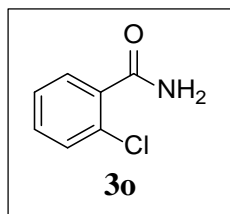

Prepared as general procedure described for **3a** from 1-Chloro-2-iodobenzene (0.210 mmol, 50mg), gave after purification with silica gel column chromatography in Hexane: ethyl acetate (40:60) as elutents **3o** as crystalline solid (24mg, 74%).

**<sup>1</sup>H (600MHz, DMSO-*d*6), (δ ppm)** 7.36-7.39 (m, 1H), 7.41-7.45 (m, 2H), 7.47-7.48 (m, 1H), 7.55 (brs, 1H), 7.84 (brs, 1H)

**<sup>13</sup>C (150 MHz, DMSO-*d*6), δ (ppm)** 127.48, 129.11, 130.06, 130.07, 131.02, 137.62, 168.64.

The expected ESI-[MS+H]<sup>+</sup> for C<sub>7</sub>H<sub>7</sub>ClNO<sup>+</sup> 156.0211 and found 156.0209

### 3,4-dichlorobenzamide

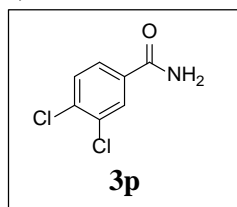

Prepared as general procedure described for **3a** from 3,4-Dichloriodobenzene (0.183mmol, 50 mg), gave after purification with silica gel column chromatography in Hexane: ethyl acetate (40:60) as elutents **3p** as white solid (17mg, 49%).

**<sup>1</sup>H (600MHz, DMSO-*d*6), (δ ppm)** 7.58 (brs, 1H), 7.74-7.75 (d, J=8.3 Hz, 1H), 7.84-7.85 (d, J=8.28 Hz, 1H), 8.10-8.12 (m, 2H).

**<sup>13</sup>C (150 MHz, DMSO-*d*6), δ (ppm)** 128.21, 19.93, 131.11, 131.67, 134.52, 135.18, 166.63.

The expected ESI-[MS+H]<sup>+</sup> for C<sub>7</sub>H<sub>6</sub>Cl<sub>2</sub>NO<sup>+</sup> is 189.9821 and observed is 189.9821

### 2-hydroxybenzamide

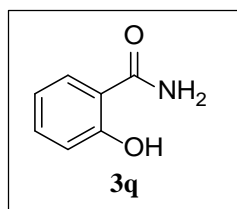

Prepared as general procedure described for **3a** from 2-iodophenol (0.227 mmol, 50mg), gave after purification with silica gel column chromatography in Hexane: ethyl acetate (3:1) as elutents **3q** as brownish solid (25mg, 80%).

**<sup>1</sup>H (600MHz, DMSO-*d*6), (δ ppm)** 6.84-6.88 (m, 2H), 7.38-7.41 (m, 1H), 7.83-7.84 (m, 1H), 7.87 (brs, 1H), 8.38 (brs, 1H), 13.02 (brs, 1H).

**<sup>13</sup>C (150 MHz, DMSO-*d*6), δ (ppm)** 114.82, 117.87, 118.82, 128.55, 134.55, 161.38, 172.54.

The calculated ESI-MS[M+H]<sup>+</sup> for C<sub>7</sub>H<sub>8</sub>NO<sub>2</sub><sup>+</sup> 138.055 and found 138.0551.

#### 4-acetylbenzamide<sup>2</sup>

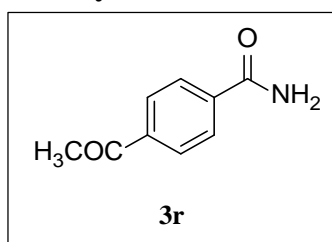

Prepared as general procedure described for **3a** from 4'-iodoacetophenone (0.203 mmol, 50mg), gave after purification with silica gel column chromatography in Hexane: ethyl acetate (40:60) as elutents **3d** as white solid (21mg, 65%).

**<sup>1</sup>H (600MHz, DMSO-*d*6), (δ ppm)** 2.62 (s, 3H), 7.59 (brs, 1H), 7.98-7.99 (m, 2H), 8.01-8.02 (m, 2H), 8.16 (brs, 1H).

**<sup>13</sup>C (150 MHz, DMSO-*d*6), δ (ppm)** 27.45, 128.22, 128.57, 138.55, 139.09, 167.54, 198.23

The calculated ESI-MS+H<sup>+</sup> for C<sub>9</sub>H<sub>10</sub>NO<sub>2</sub><sup>+</sup> 164.0706 and found 164.706.

#### 4-nitrobenzamide<sup>2</sup>

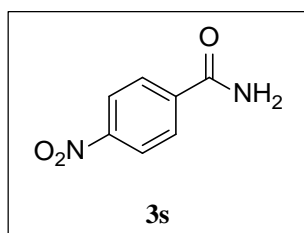

Prepared as general procedure described for **3a** from 1-Iodo-4-nitrobenzene (0.200 mmol, 50mg), gave after purification with silica gel column chromatography in Hexane: ethyl acetate (40:60) as elutents **3s** as white solid (19mg, 57%).

**<sup>1</sup>H (600MHz, DMSO-*d*6), (δ ppm)** 7.72 (brs, 1H), 8.09-8.10 (d, *J*=8.76 Hz, 2H), 8.27 (brs, 1H), 8.30-8.31 (d, *J*=8.76 Hz, 2H)

**<sup>13</sup>C (150 MHz, DMSO-*d*6), δ (ppm)** 123.94, 129.38, 140.44, 149.52, 166.68

The calculated ESI-[MS+H]<sup>+</sup> for C<sub>7</sub>H<sub>7</sub>N<sub>2</sub>O<sub>3</sub><sup>+</sup> 167.0451 and found 169.0458.

#### 4-cyanobenzamide<sup>2</sup>

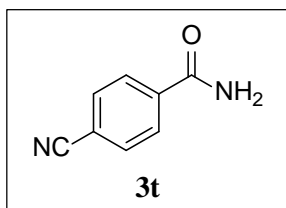

Prepared as general procedure described for **3a** from 4-Iodobenzonitrile (0.218 mmol, 50mg), gave after purification with silica gel column chromatography in Hexane: ethyl acetate (40:60) as elutents **3t** as white solid (23mg, 72%).

<sup>1</sup>H (600MHz, DMSO-*d*6), (δ ppm) 7.64 (brs, 1H), 7.94 (d, *J* = 8.28 Hz, 2H), 8.02 (d, *J* = 8.4 Hz, 2H), 8.19 (brs, 1H)

<sup>13</sup>C (150 MHz, DMSO-*d*6), δ (ppm) 114.11, 118.82, 128.72, 132.82, 138.79, 166.91.

The calculated ESI-[MS+H]<sup>+</sup> for C<sub>8</sub>H<sub>7</sub>N<sub>2</sub>O<sup>+</sup> 147.0553 and found 147.0459.

#### [1,1'-biphenyl]-4-carboxamide

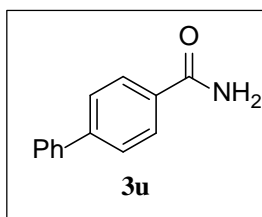

Prepared as general procedure described for **3a** from 4-iodobiphenyl (0.178 mmol, 50mg), gave after purification with silica gel column chromatography in Hexane: ethyl acetate (60:40) as elutents **3u** as white solid (21mg, 60%).

<sup>1</sup>H (600MHz, DMSO-*d*6), (δ ppm) 7.38-7.42 (m, 2H), 7.48-7.51 (t, *J*=7.56, 15.4 Hz, 2H), 7.72-7.76 (m, 4H), 7.97 (d, *J*=8.3 Hz, 2H), 8.02 (brs, 1H)

<sup>13</sup>C (150 MHz, DMSO-*d*6), δ (ppm) 126.91, 127.34, 128.48, 128.63, 129.48, 133.57, 139.71, 143.23, 168.02

The calculated ESI-MS [M+H]<sup>+</sup> for C<sub>13</sub>H<sub>12</sub>NO<sup>+</sup> 198.0913 and found 198.0912.

#### 1-naphthamide<sup>2</sup>

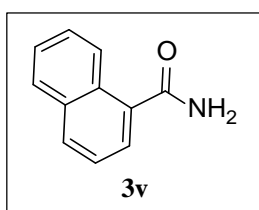

Prepared as general procedure described for **3a** from 1-Iodonaphthalene (0.196 mmol, 50mg), gave after purification with silica gel column chromatography in Hexane: ethyl acetate (40:60) as elutents **3v** as white solid (18mg, 55%).

**<sup>1</sup>H (600MHz, DMSO-*d*6), (δ ppm)** 7.55-7.59 (m, 4H), 7.64-7.65 (m, 1H), 7.96-8.01 (m, 3H), 8.31-8.32 (m, 1H).

**<sup>13</sup>C (150 MHz, DMSO-*d*6), δ (ppm)** 125.42, 126.61, 127.09, 128.56, 128.75, 130.15, 130.19, 130.35, 133.68, 135.14, 171.07.

The calculated ESI-MS [M+H]<sup>+</sup> for C<sub>11</sub>H<sub>10</sub>NO<sup>+</sup> is 172.0757 and found 172.0754.

### 2-naphthamide<sup>2</sup>

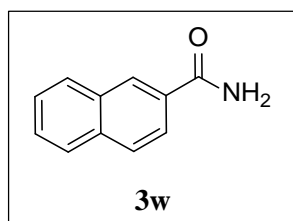

Prepared as general procedure described for **3a** from 2-Iodonaphthalene (0.196 mmol, 50mg), gave after purification with silica gel column chromatography in Hexane: ethyl acetate (40:60) as elutents **3w** as white solid (15mg, 45%).

**<sup>1</sup>H (600MHz, DMSO-*d*6), (δ ppm)** 7.43 (brs, 1H), 7.57-7.62 (m, 2H), 7.97-8.01 (m, 4H), 8.11 (brs, 1H), 8.49 (s, 1H)

**<sup>13</sup>C (150 MHz, DMSO-*d*6), δ (ppm)** 124.86, 127.099, 128.01, 128.05, 128.21, 128.25, 129.31, 132.14, 132.63, 134.64, 168.42.

The calculated ESI-MS [M+H]<sup>+</sup> for C<sub>11</sub>H<sub>10</sub>NO<sup>+</sup> 172.0757 and found 172.0756.

### 9H-fluorene-2-carboxamide

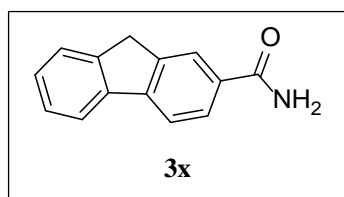

Prepared as general procedure described for **3a** from **2-Iodofluorene** (0.171 mmol, 50mg), gave after purification with silica gel column chromatography in Hexane: ethyl acetate (60:40) as elutents **3x** as white solid (15mg, 42%).

**<sup>1</sup>H (600MHz, DMSO-*d*6), (δ ppm)** 3.98 (s, 2H), 7.20 (brs, 1H), 7.36-7.38(t, *J* = 7.3, 14.7 Hz, 1H), 7.41-7.43 (t, *J* = 7.38, 14.8 Hz, 1H), 7.63 (d, *J* = 7.38 Hz, 1H), 7.93-7.97 (m, 4H), 8.11 (s, 1H).

$^{13}\text{C}$  (150 MHz, DMSO-*d*6),  $\delta$  (ppm) 120.05, 121.19, 124.82, 125.76, 126.96, 127.39, 128.01, 133.05, 140.74, 143.31, 144.33, 144.39, 168.47.

The calculated ESI-[M+H]<sup>+</sup> for C<sub>14</sub>H<sub>12</sub>NO<sup>+</sup> 210.0913 and found 210.0913.

### thiophene-2-carboxamide<sup>3</sup>

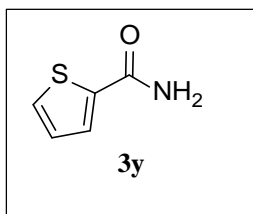

Prepared as general procedure described for **3a** from 2-Iodothiophene (0.238 mmol, 50mg), gave after purification with silica gel column chromatography in Hexane: ethyl acetate (60:40) as elutents **3y** as white solid (20mg, 66%).

$^1\text{H}$  (600MHz, DMSO-*d*6), ( $\delta$  ppm) 7.12-7.139 (t, *J* = 4.0 Hz, 8.6 Hz, 1H), 7.36 (brs, 1H), 7.73-7.74 (m, 2H), 7.95 (brs, 1H).

$^{13}\text{C}$  (150 MHz, DMSO-*d*6),  $\delta$  (ppm) 128.33, 129.11, 131.42, 140.79, 163.33.

The calculated ESI-[M+H]<sup>+</sup> for C<sub>5</sub>H<sub>6</sub>NOS<sup>+</sup> 128.0165 and found 128.0159.

### isoindoline-1,3-dione<sup>4</sup>

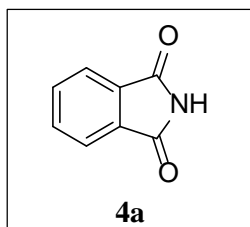

Prepared as general procedure described for **3a** from 1,2-Diiodobenzene (0.152 mmol, 50mg) or 2-Bromiodobenzene (0.176 mmol, 50mg), gave after purification with silica gel column chromatography in Hexane: ethyl acetate (60:40) as elutents **4a** as white solid (20mg, 66%).

$^1\text{H}$  (600MHz, DMSO-*d*6), ( $\delta$  ppm) 7.83 (s,1H), 11.35 (brs, 1H)

$^{13}\text{C}$  (150 MHz, DMSO-*d*6),  $\delta$  (ppm) 123.41, 133.06, 134.80,169.71.

Prepared as general procedure described for **3a** from 2-Iodobenzoic acid (0.201 mmol, 50mg) or Methyl 2-iodobenzoate (0.190 mmol, 50mg), gave after purification with silica gel column chromatography in Hexane: ethyl acetate (60:40) as elutents **4a** as white solid (20mg, 66%).

$^1\text{H}$  (600MHz, DMSO-*d*6), ( $\delta$  ppm) 7.82 (s,1H), 11.35 (brs, 1H)

$^{13}\text{C}$  (150 MHz, DMSO-*d*6),  $\delta$  (ppm) 123.40, 133.06, 134.79,169.71.

### 1,3-diphenylurea

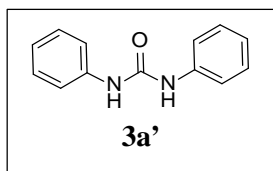

Prepared as general procedure described for **3a** from 2-Iodoaniline (0.229 mmol, 50mg), gave after purification with silica gel column chromatography in Hexane: ethyl acetate (40:60) as elutents **3a'** as white solid (20mg, 80%).

**<sup>1</sup>H (600MHz, DMSO-*d*6), (δ ppm)** 6.95-6.98 (m, 2H), 7.26-7.29 (m, 4H), 7.44-7.45 (m, 4H), 8.65 (s, 2H).

**<sup>13</sup>C (150 MHz, DMSO-*d*6), δ (ppm)** 118.64, 122.27, 129.45, 140.15, 152.99.

The calculated ESI-[M+H]<sup>+</sup> for C<sub>5</sub>H<sub>6</sub>NOS<sup>+</sup> 213.1022 and found 213.1020.

#### D. References:

1. S. Zaramella, R. Strömberg, and E. Yeheskiely, *Eur. J. Org. Chem.* **2002**, 2633-2639.
2. X. Qi, H.-J. Ai, C.-X. Cai, J.-B. Peng, J. Ying, X.-F. Wu, *Eur. J. Org. Chem.* **2017**, 7222–7225.
3. R. S. Mane, B. M. Bhanage, *RSC Adv.*, **2015**, 5, 76122.
4. D. N. Sawant, Y. S. Wagh, K. D. Bhatte, B. M. Bhanage, *Eur. J. Org. Chem.* **2011**, 6719–6724.

(E) Copies of  $^1\text{H}$ ,  $^{13}\text{C}$  and ESI-MS

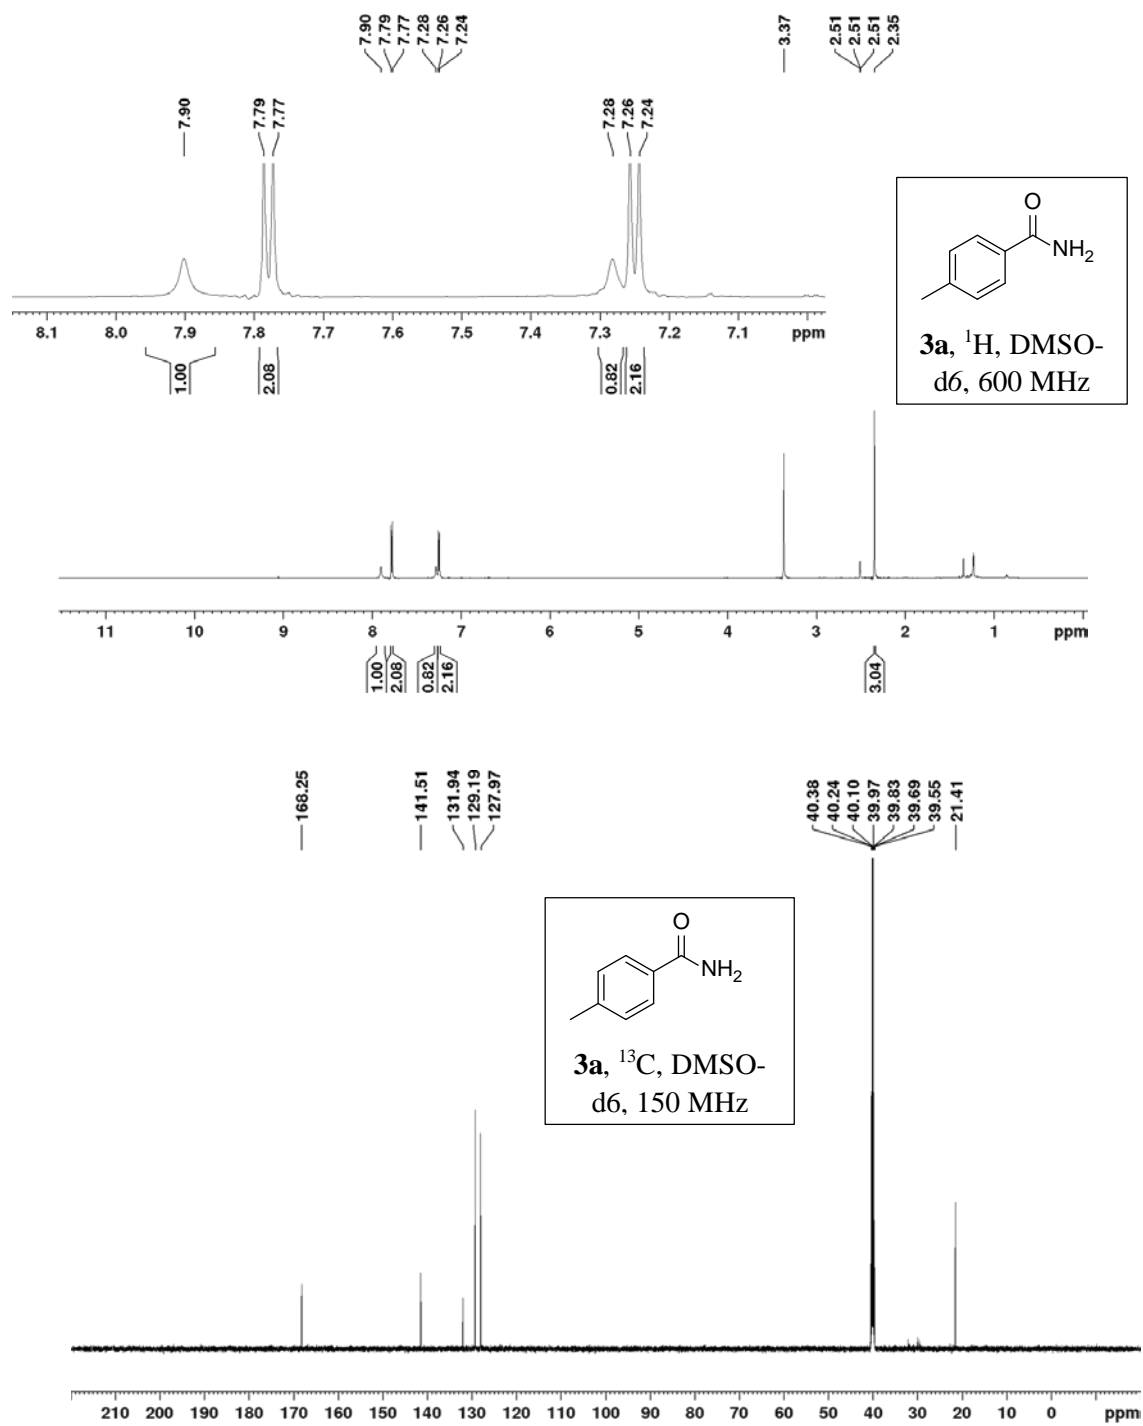

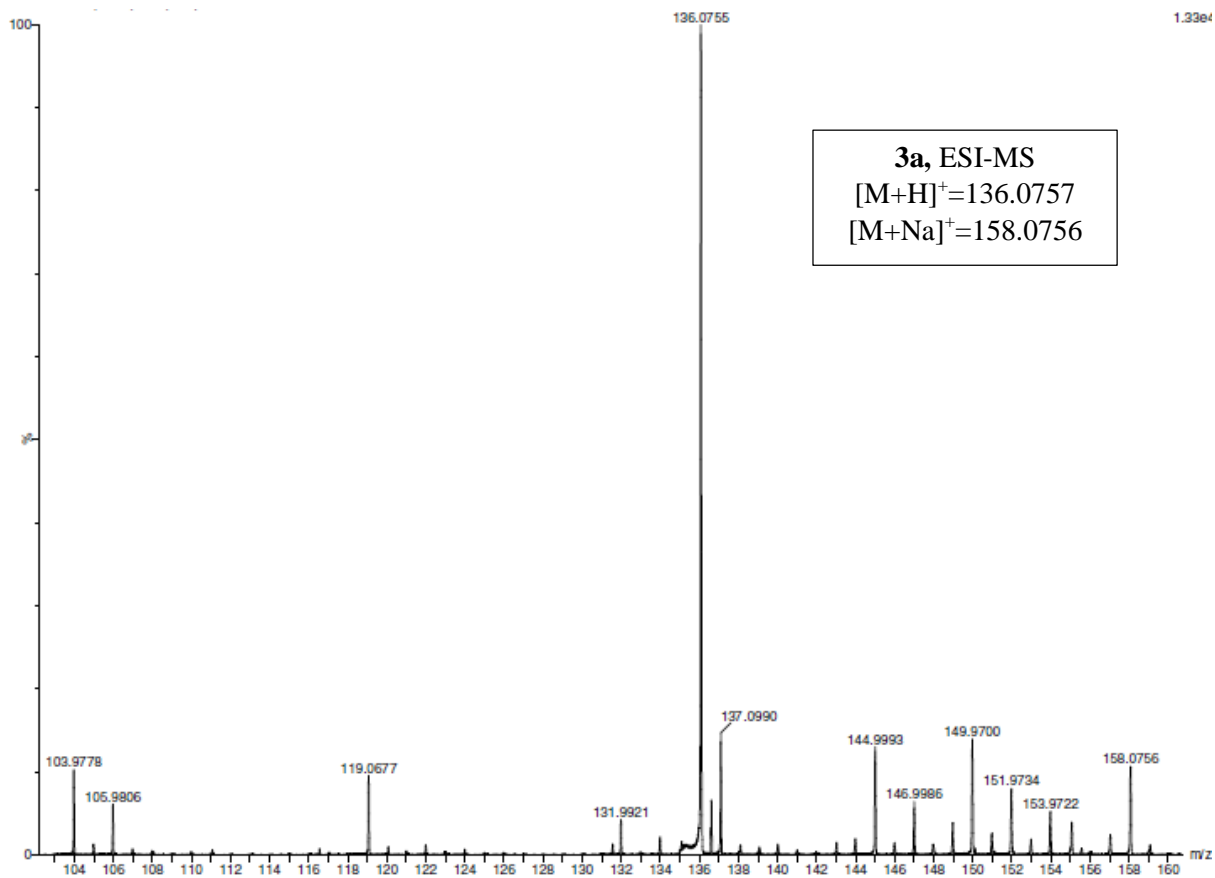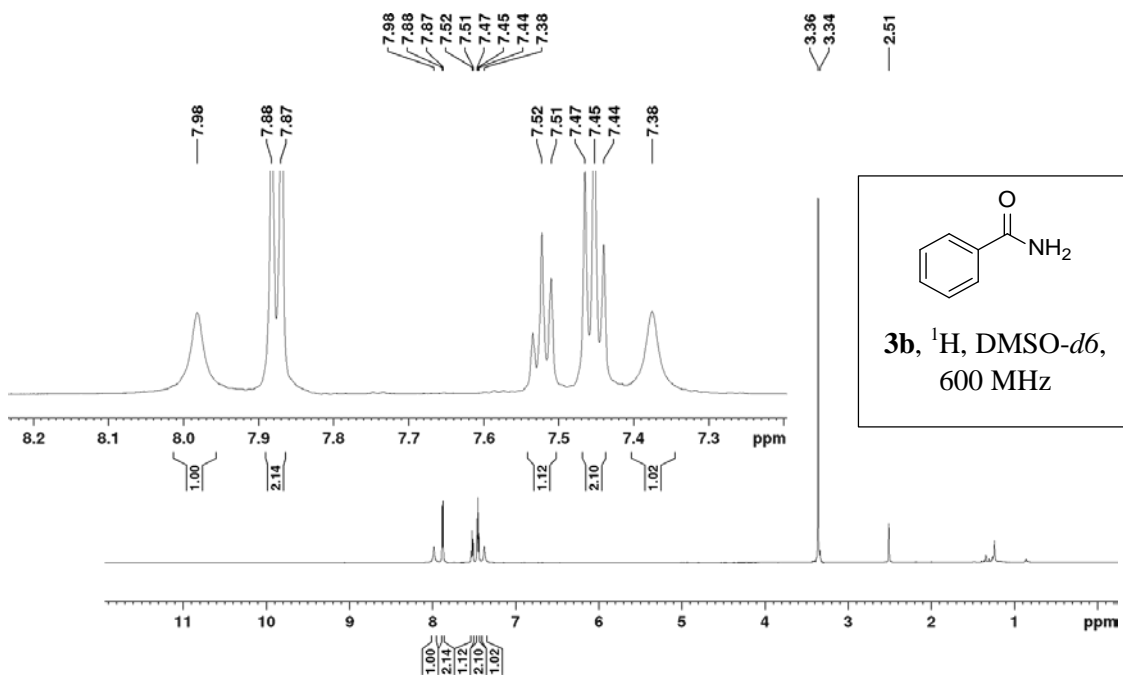



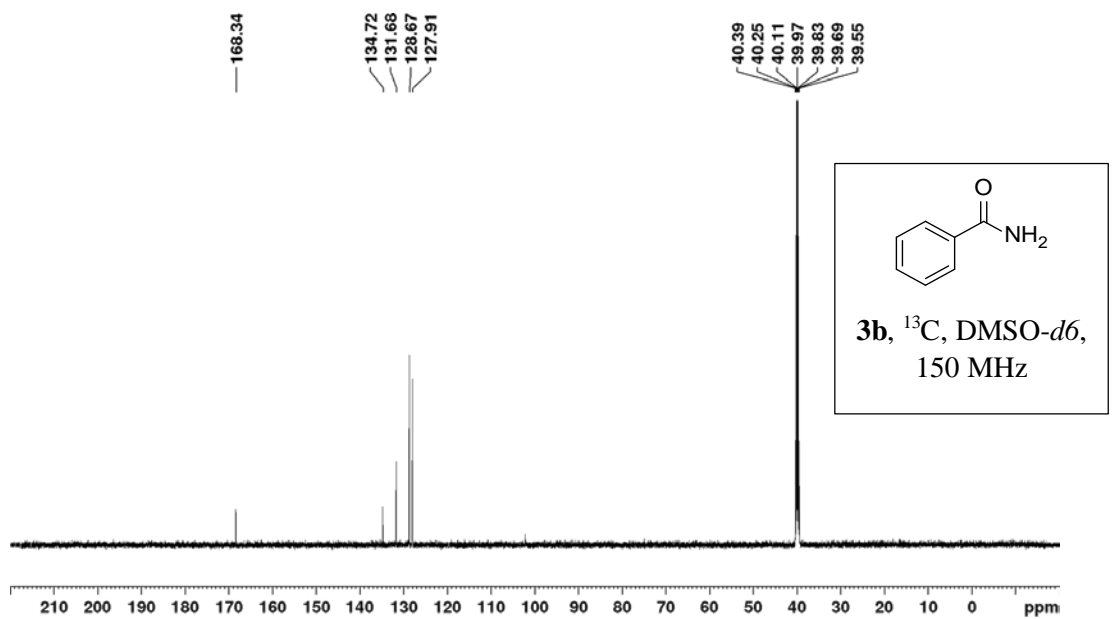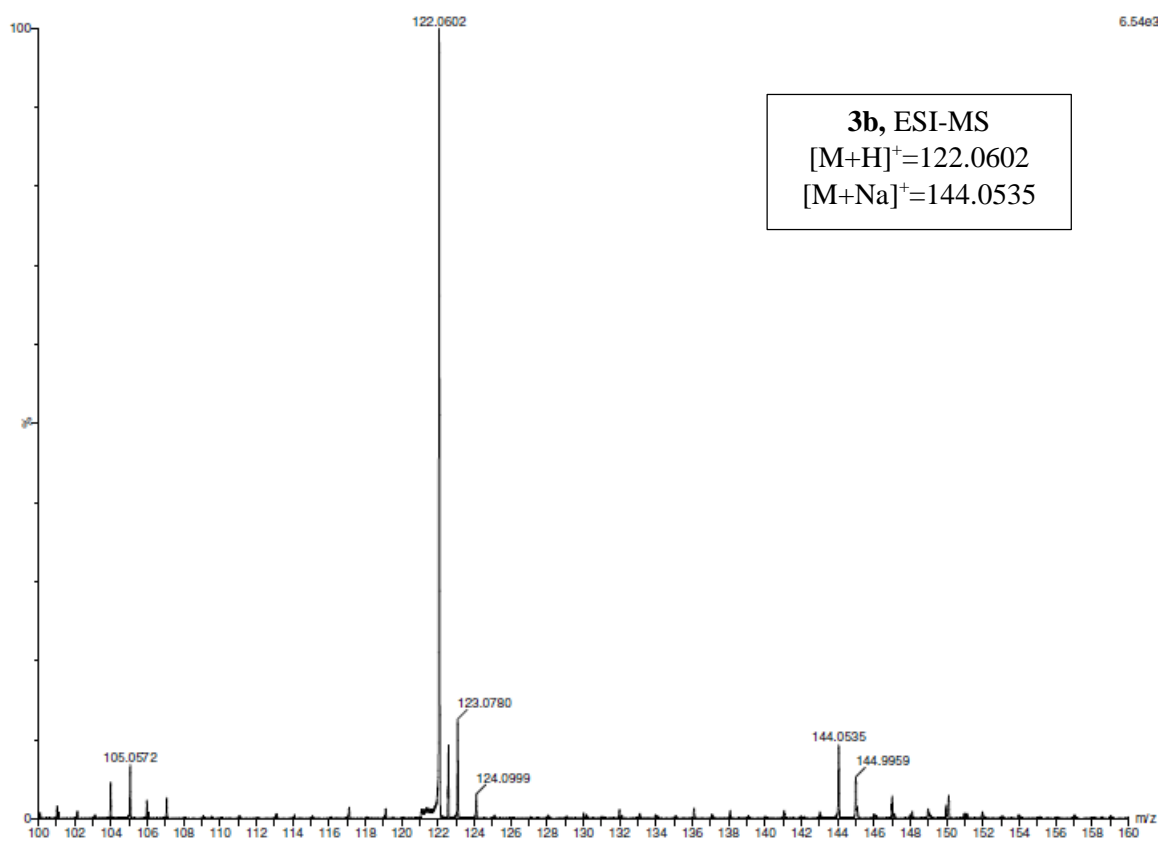

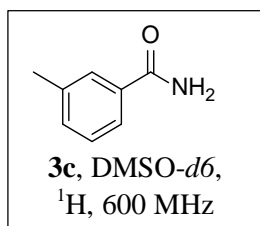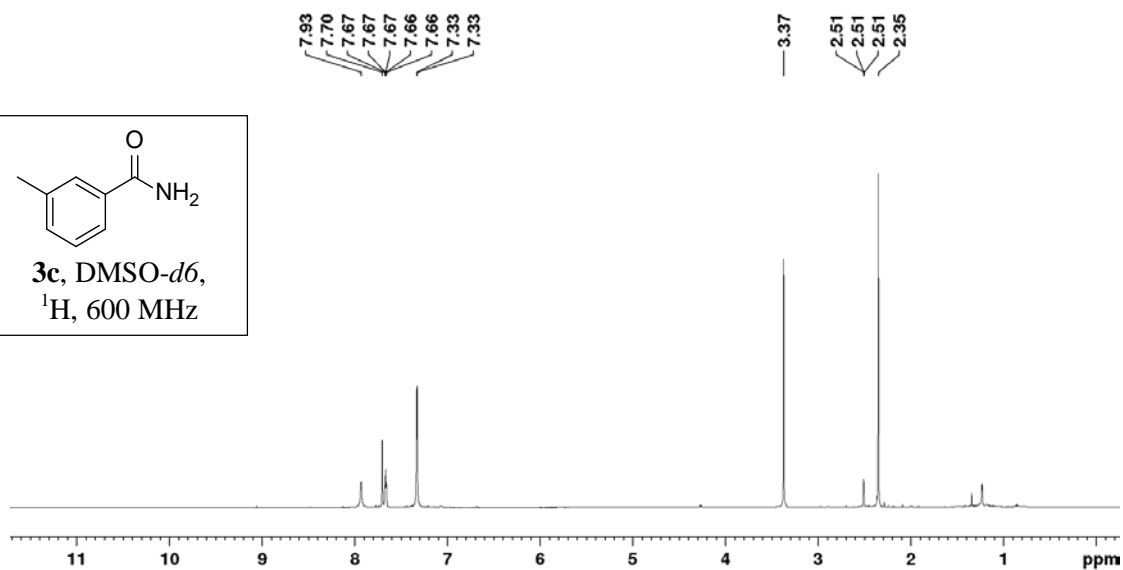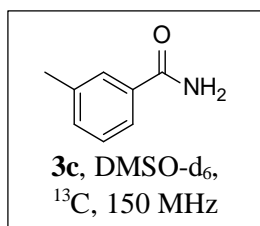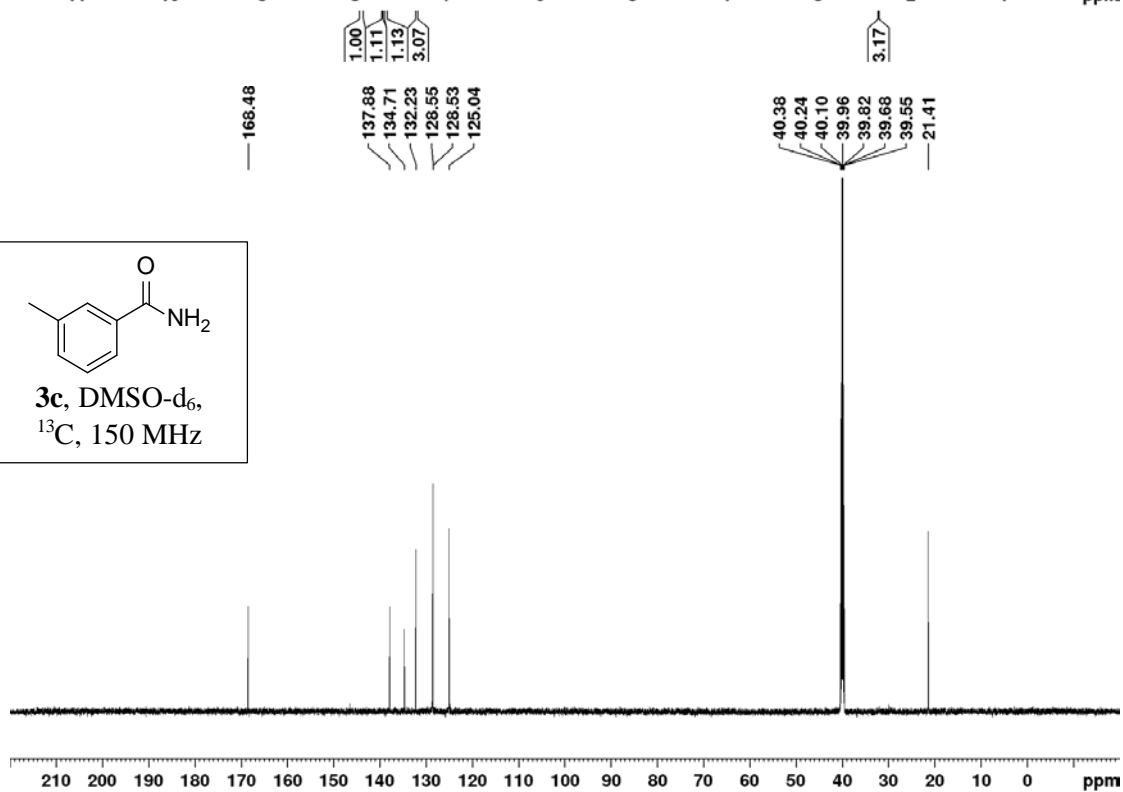

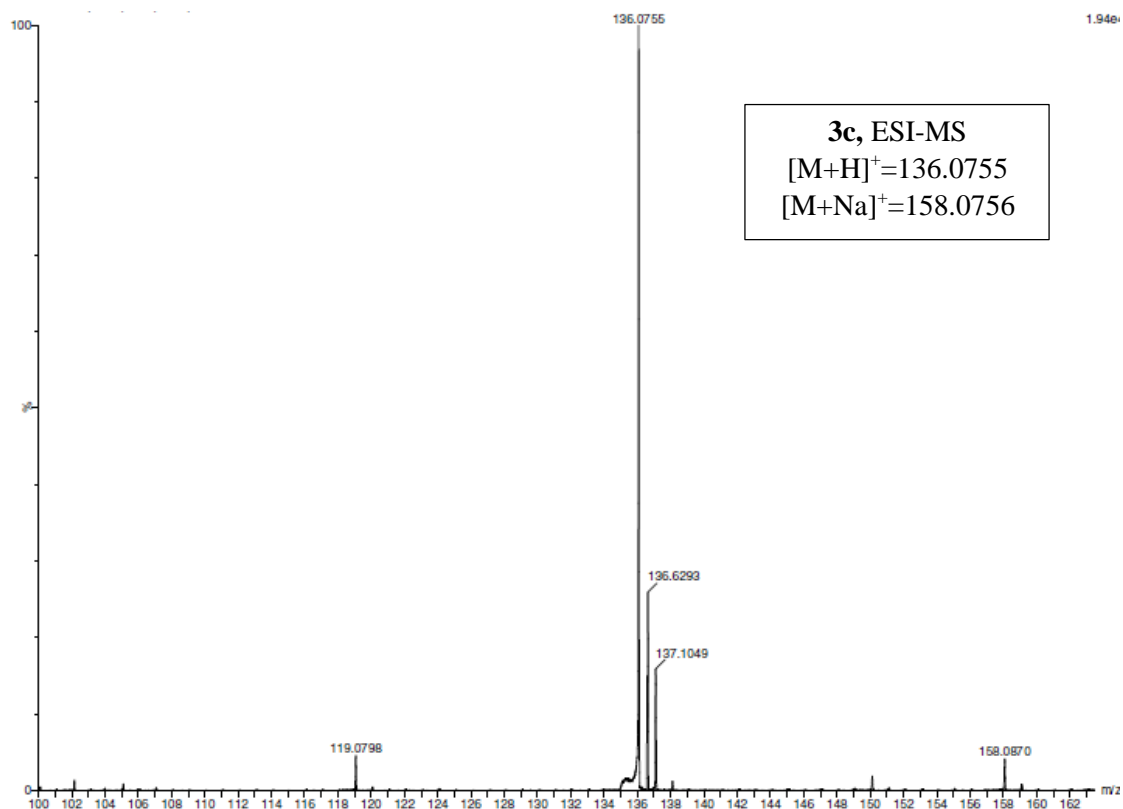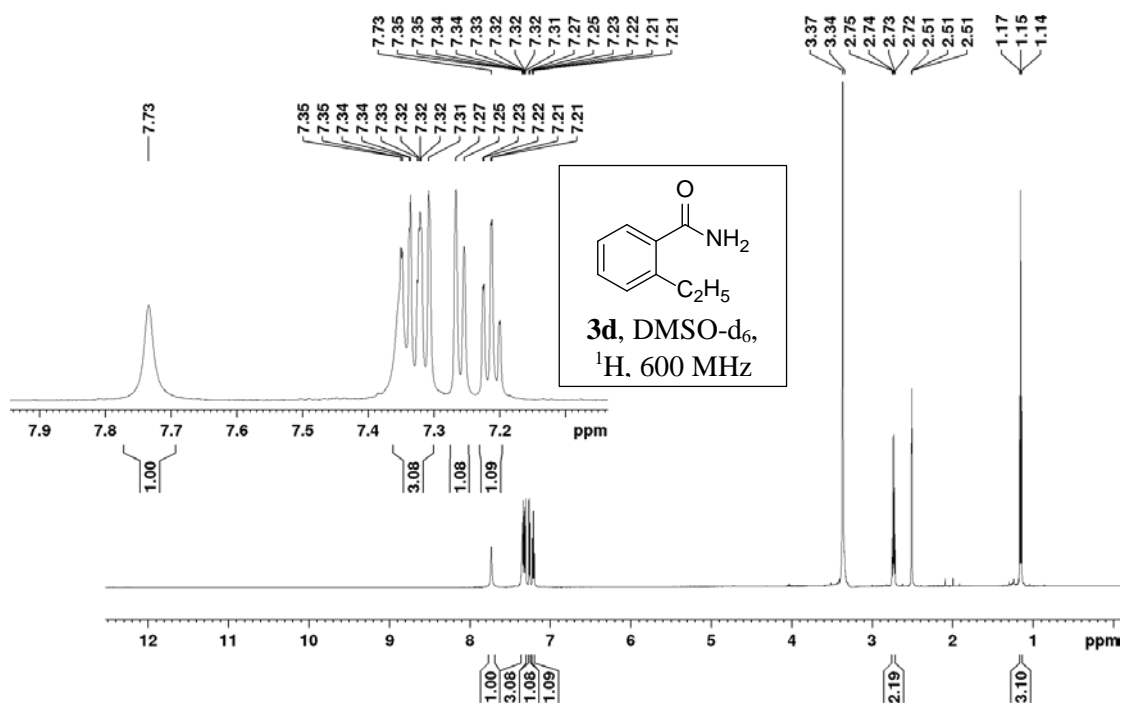

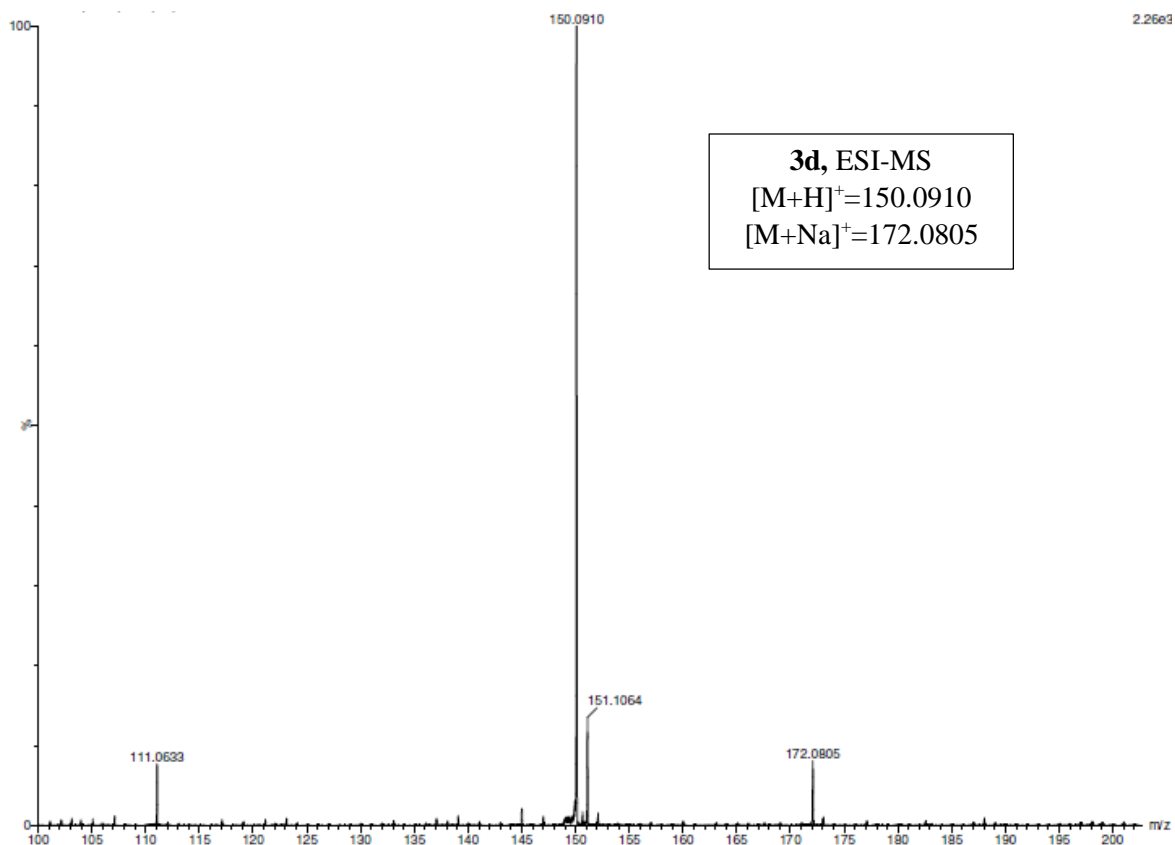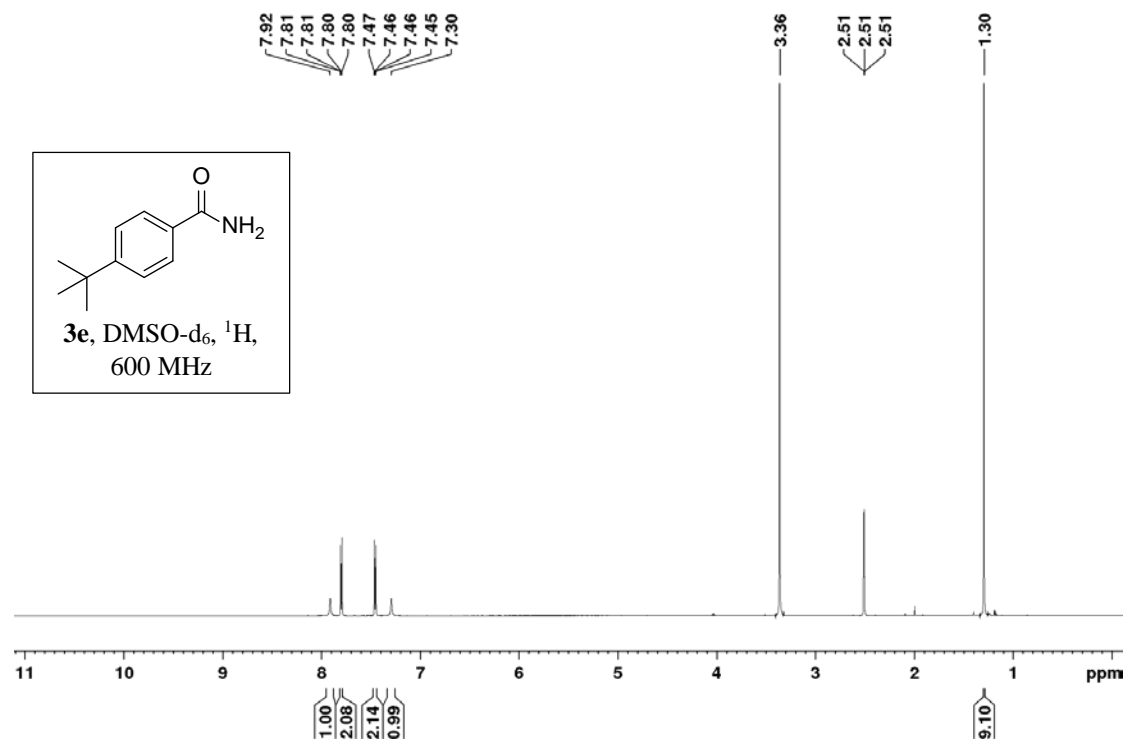

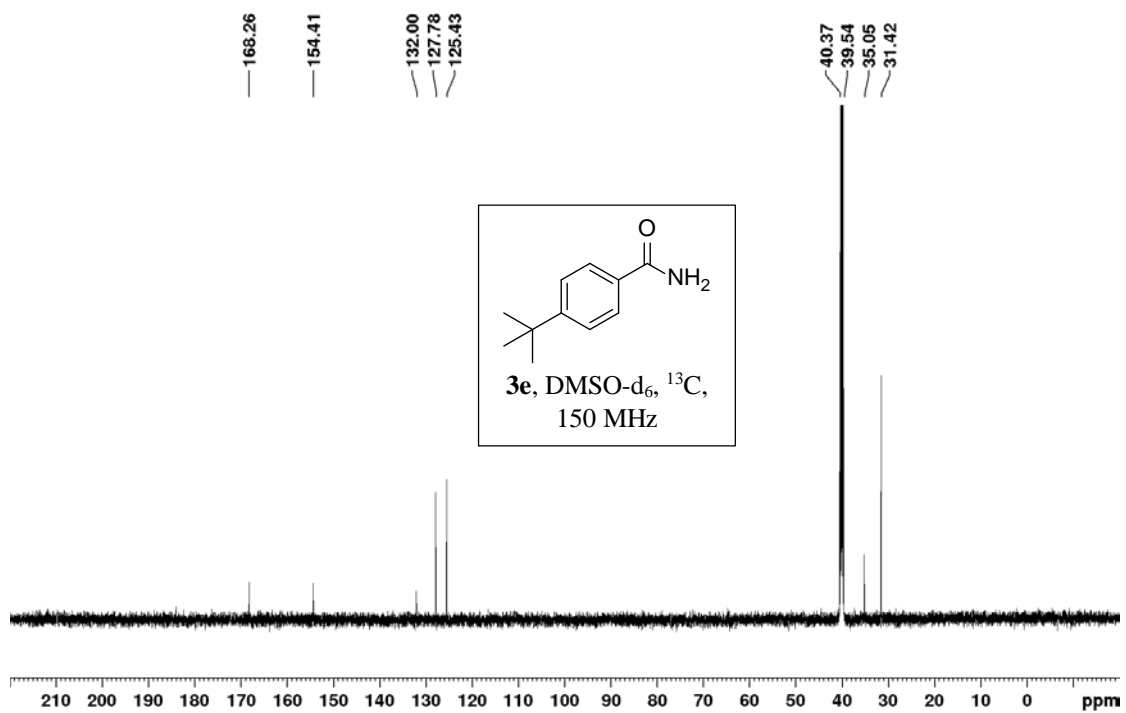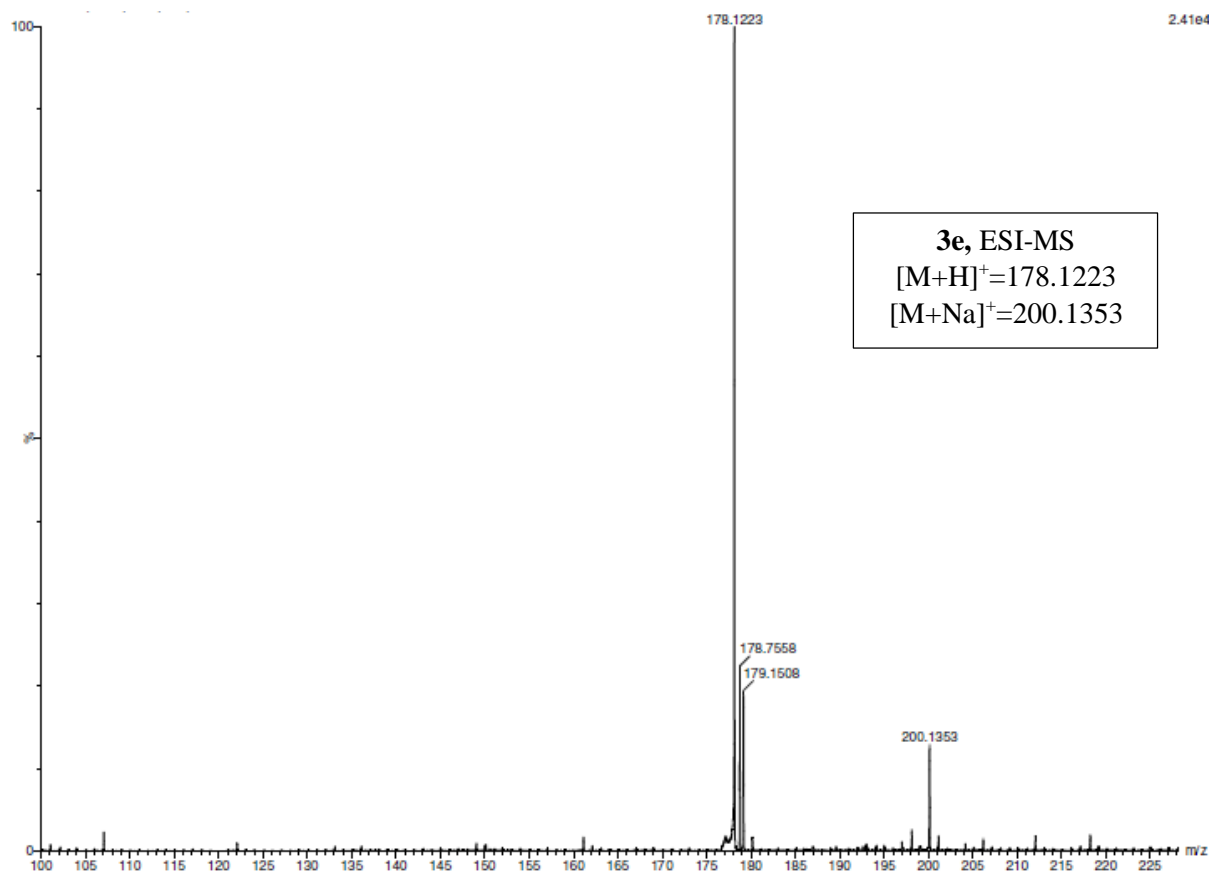

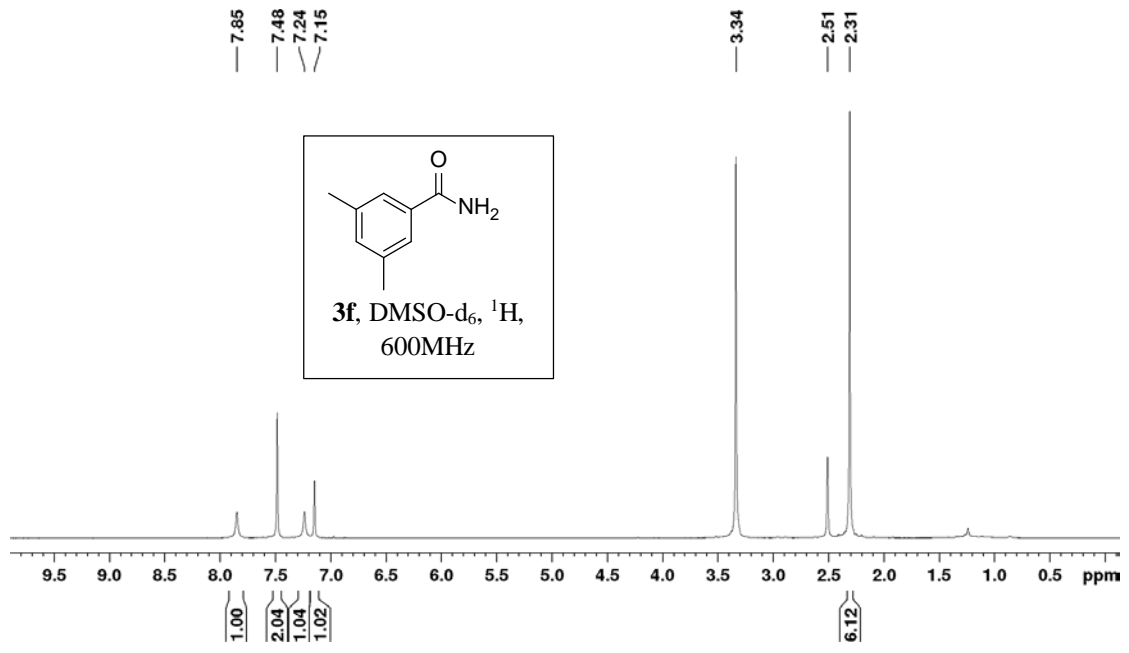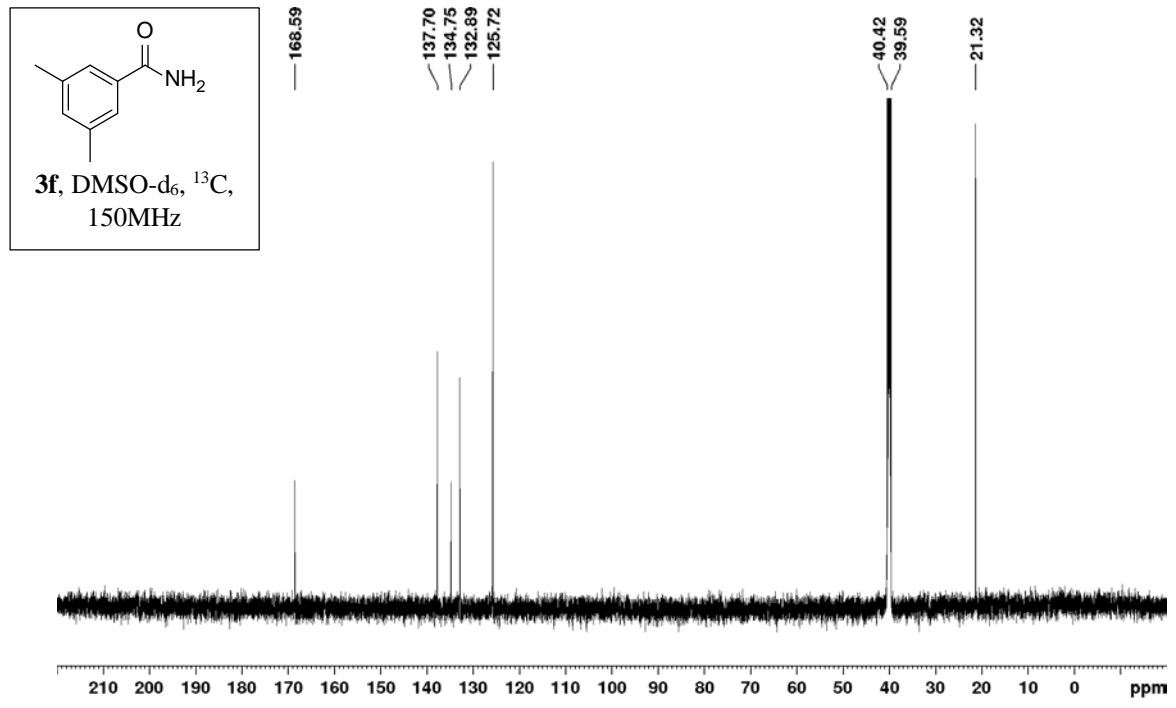

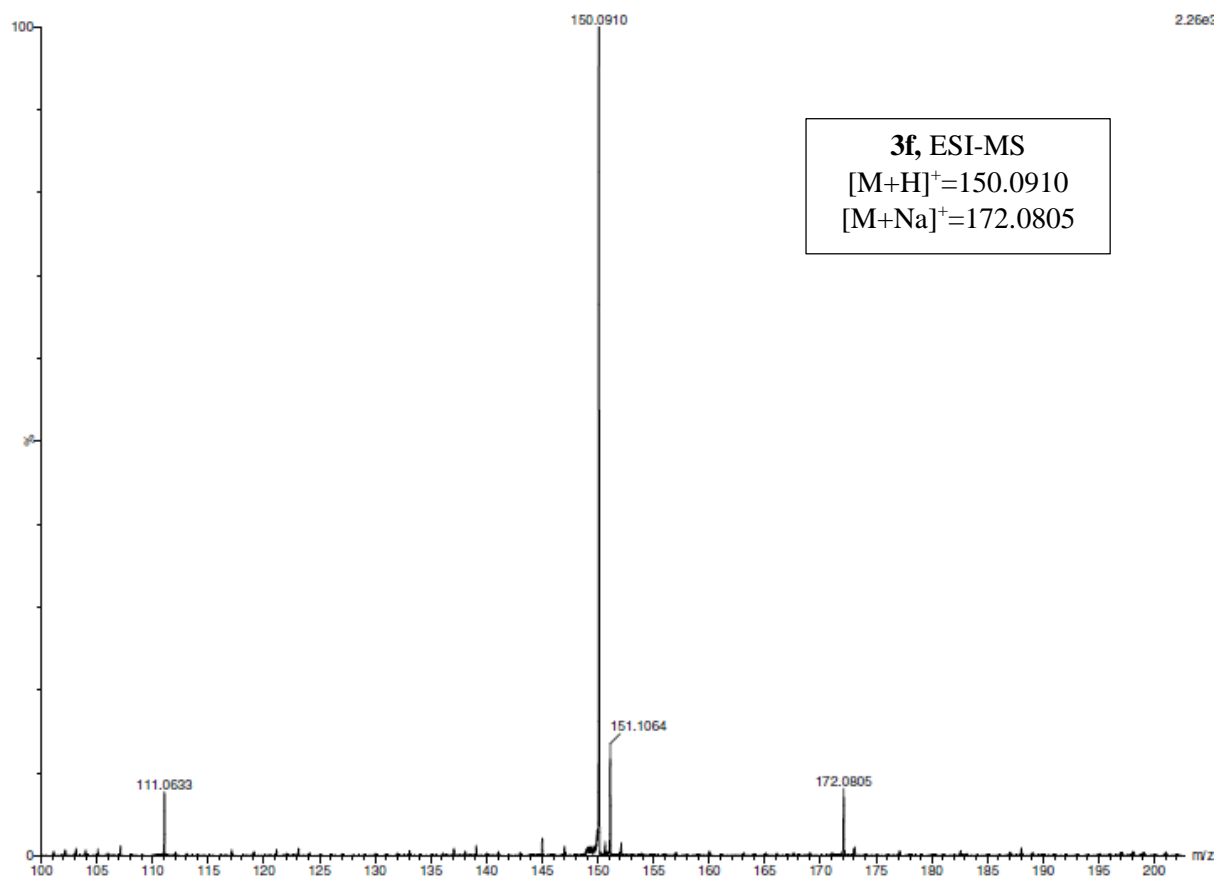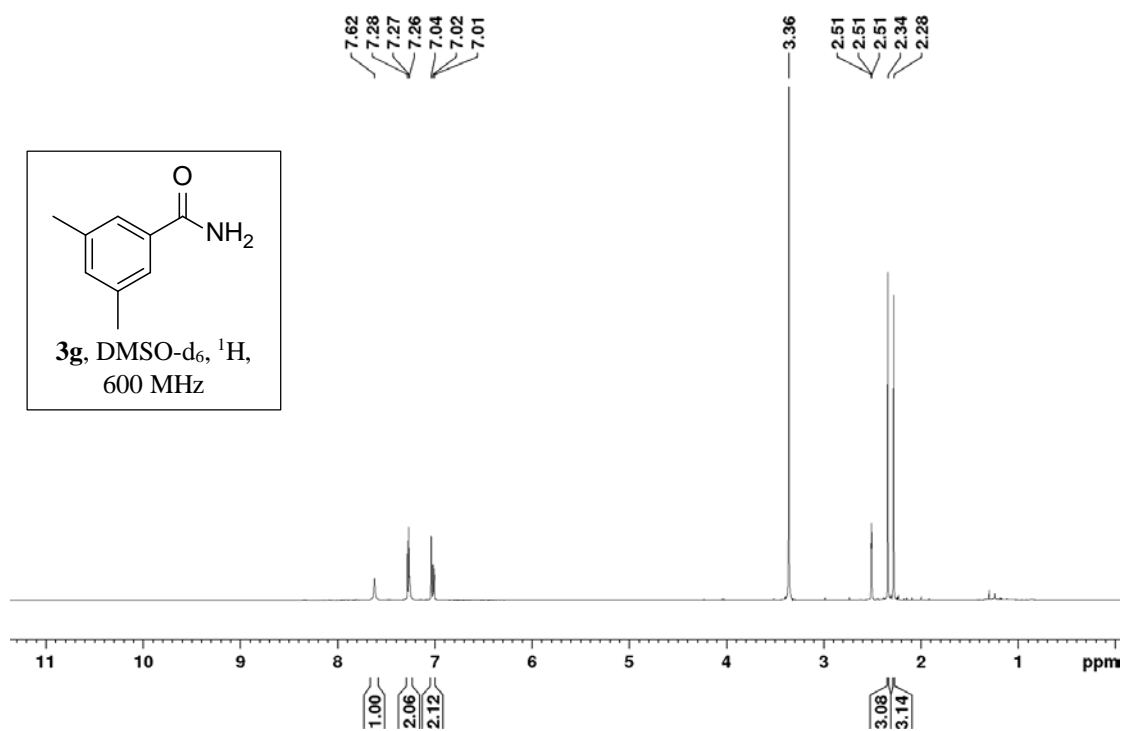

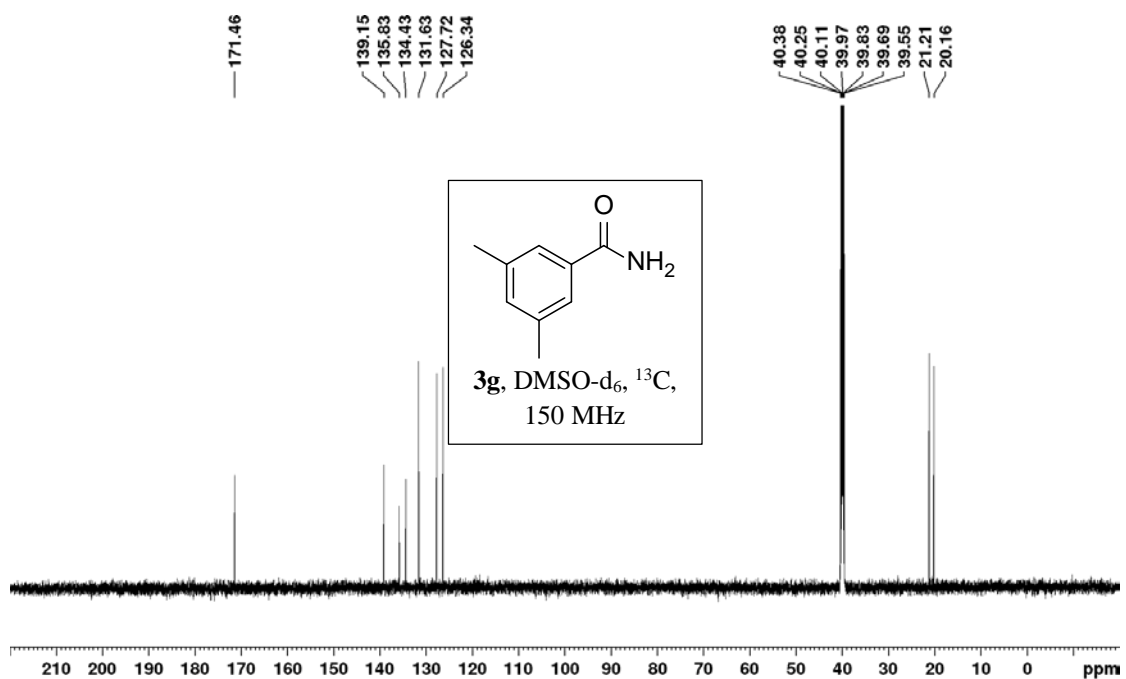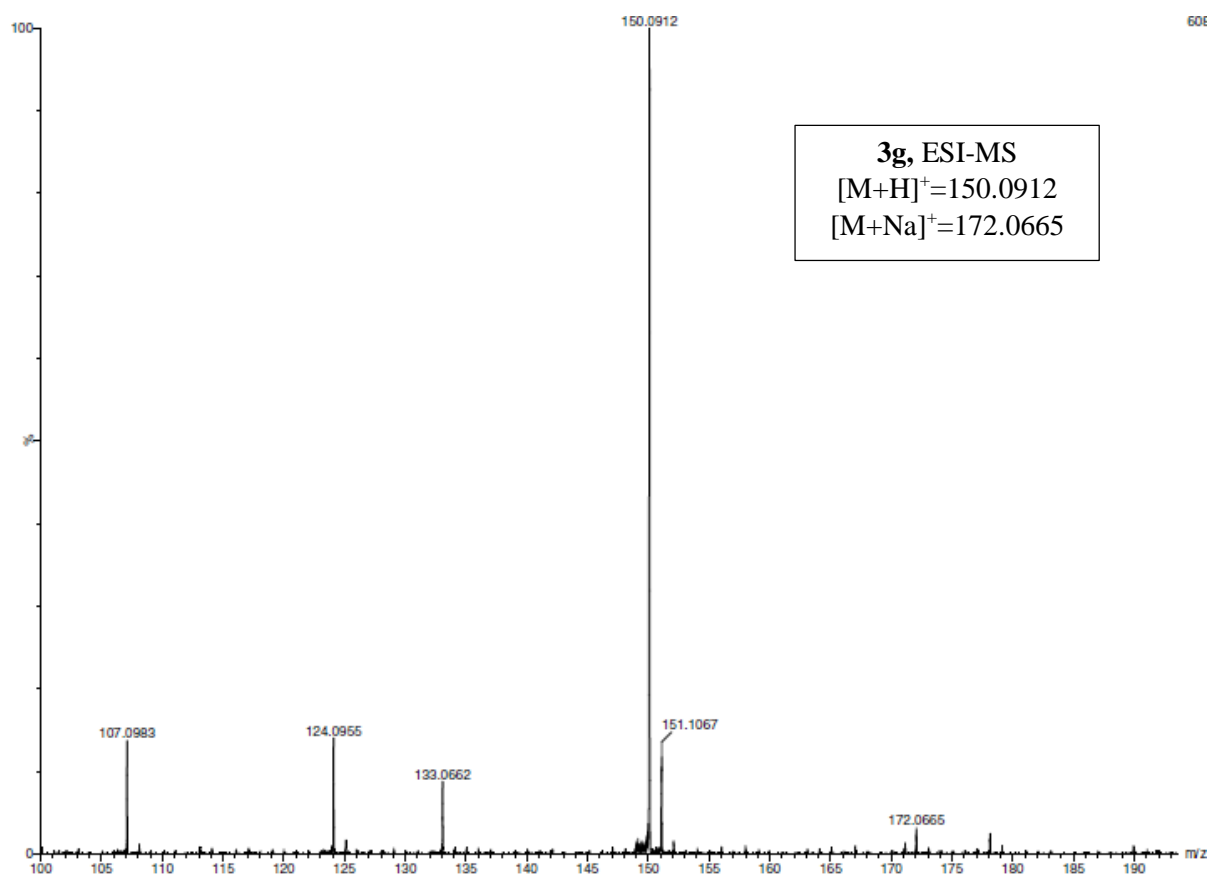



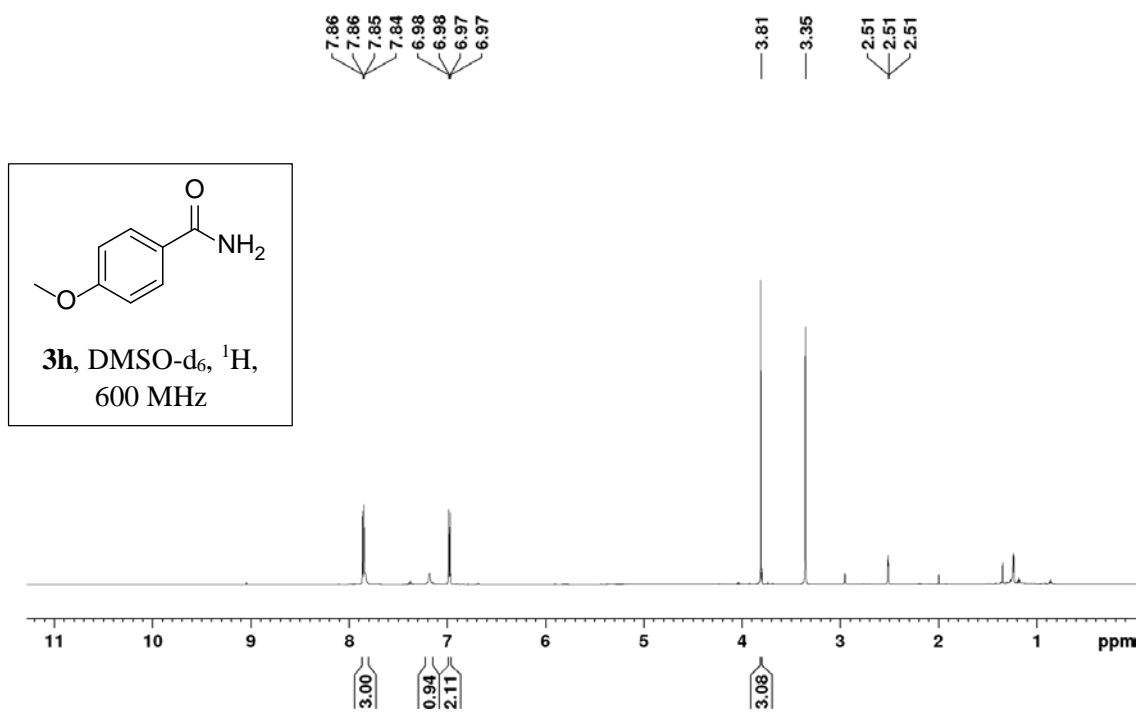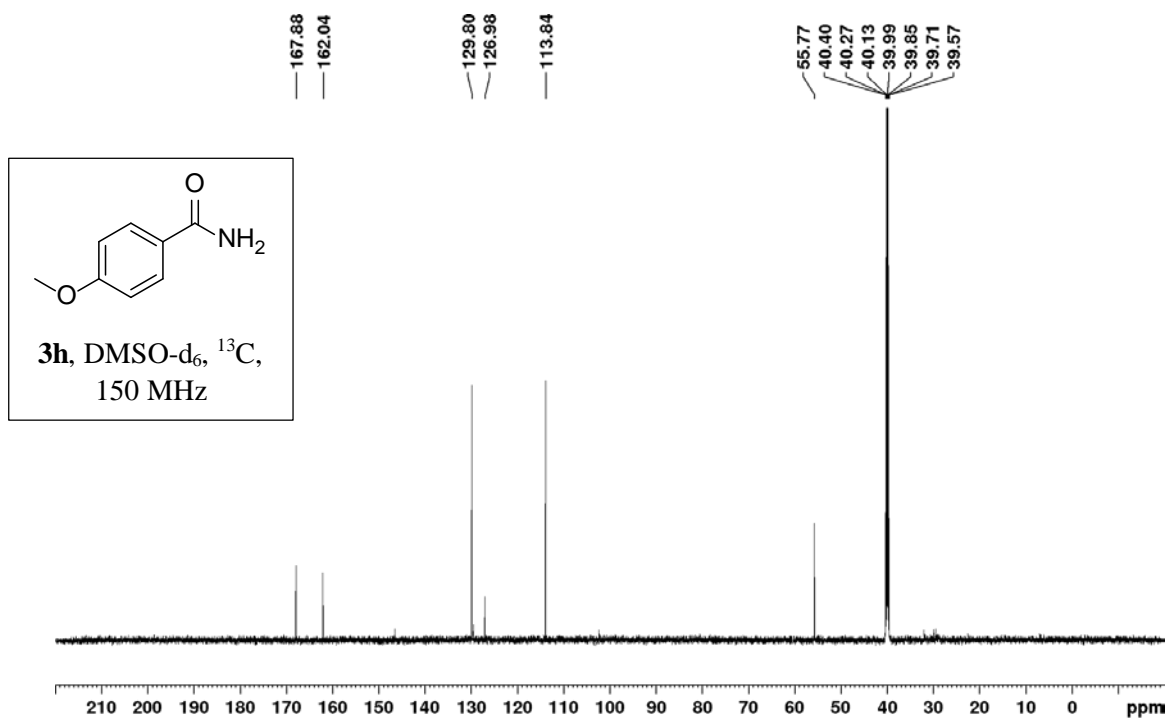

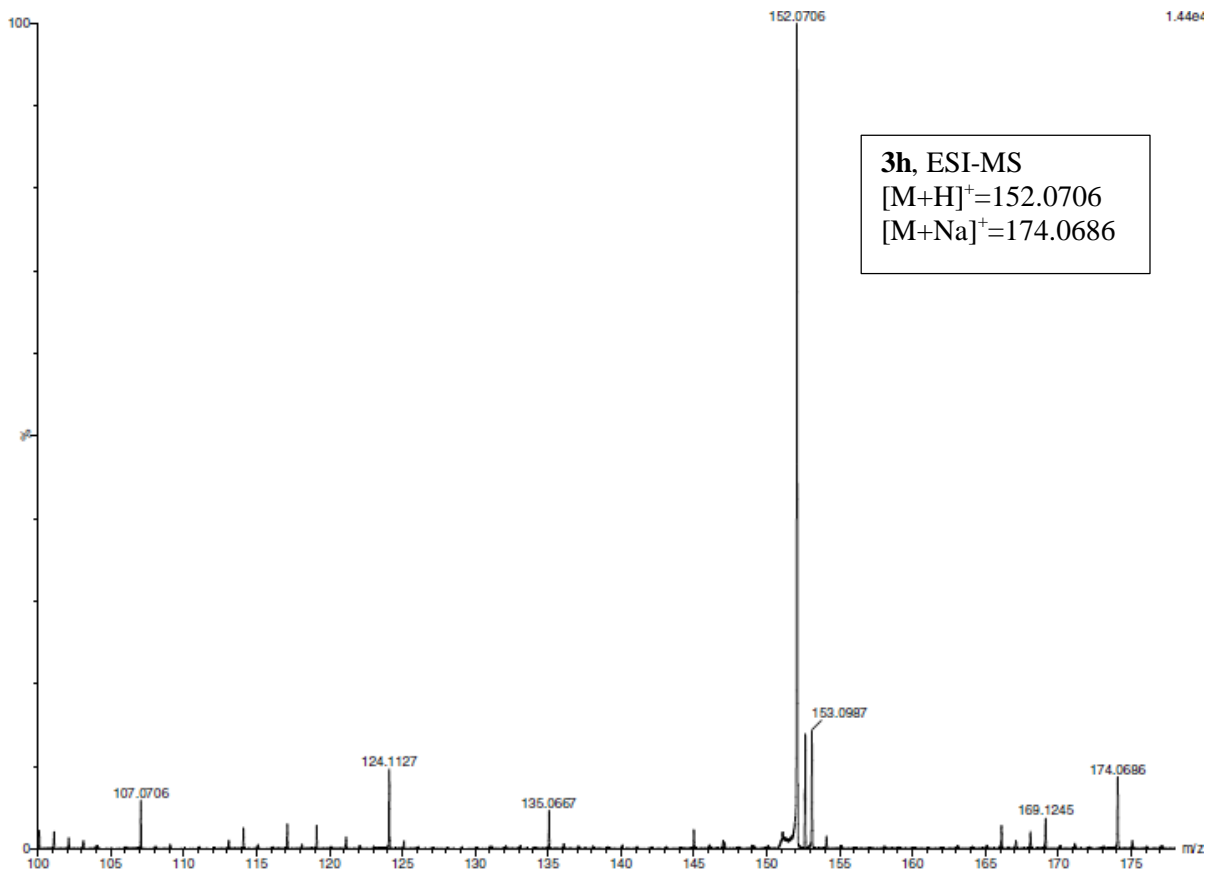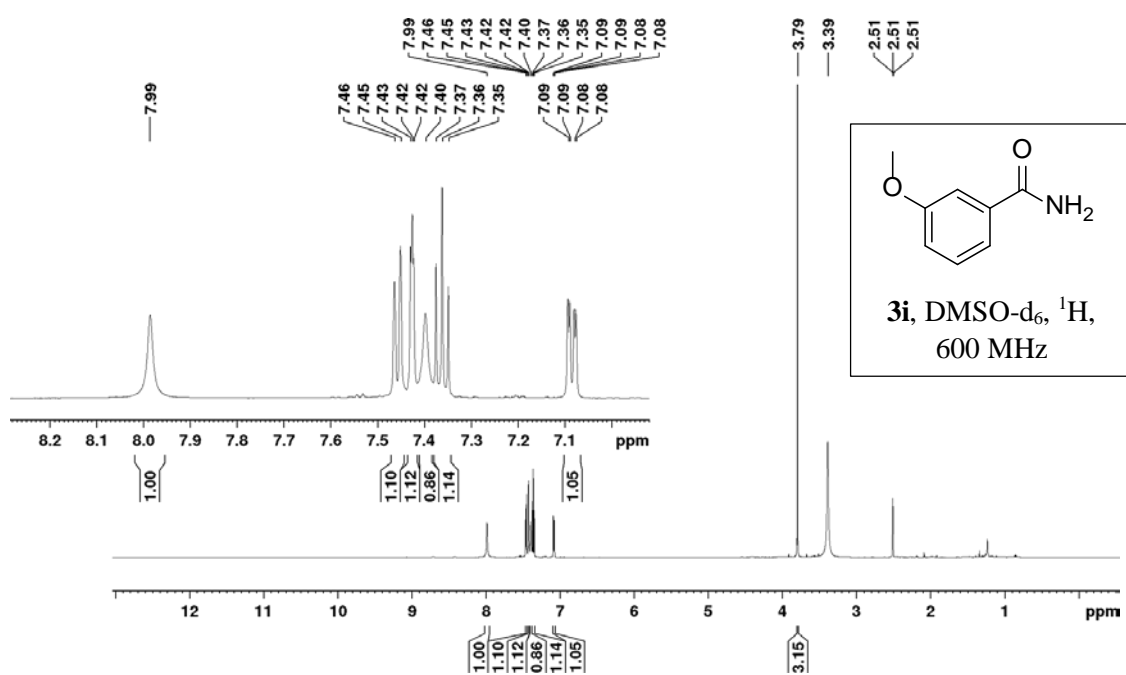

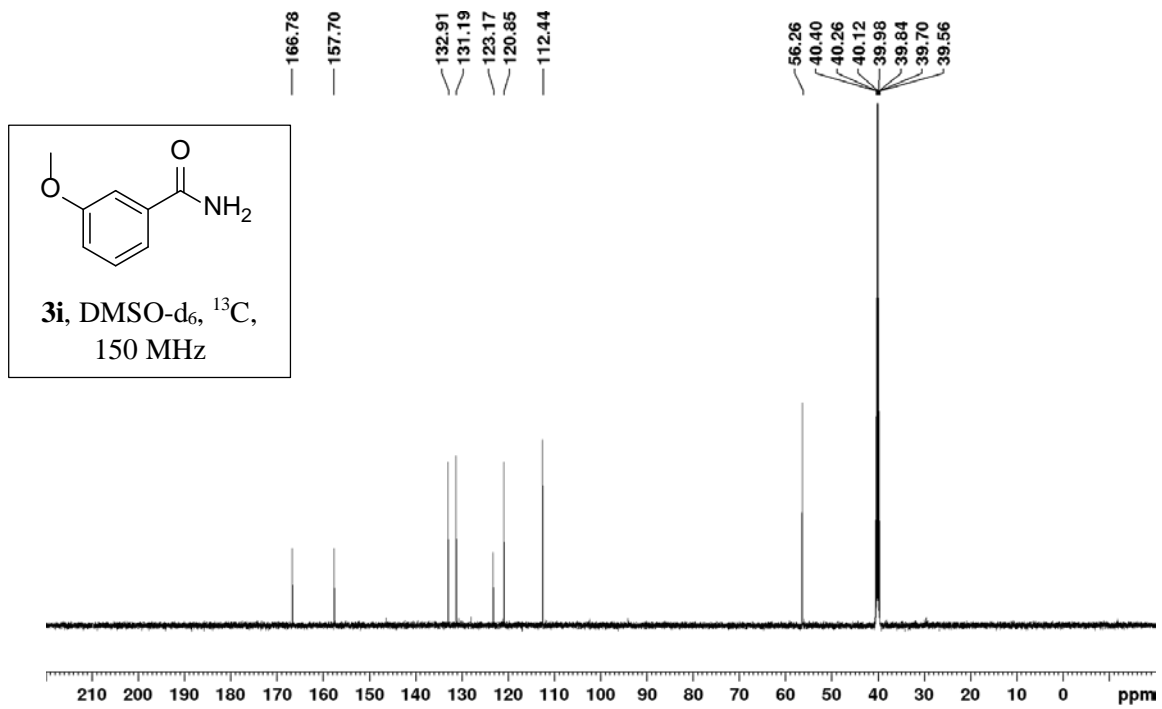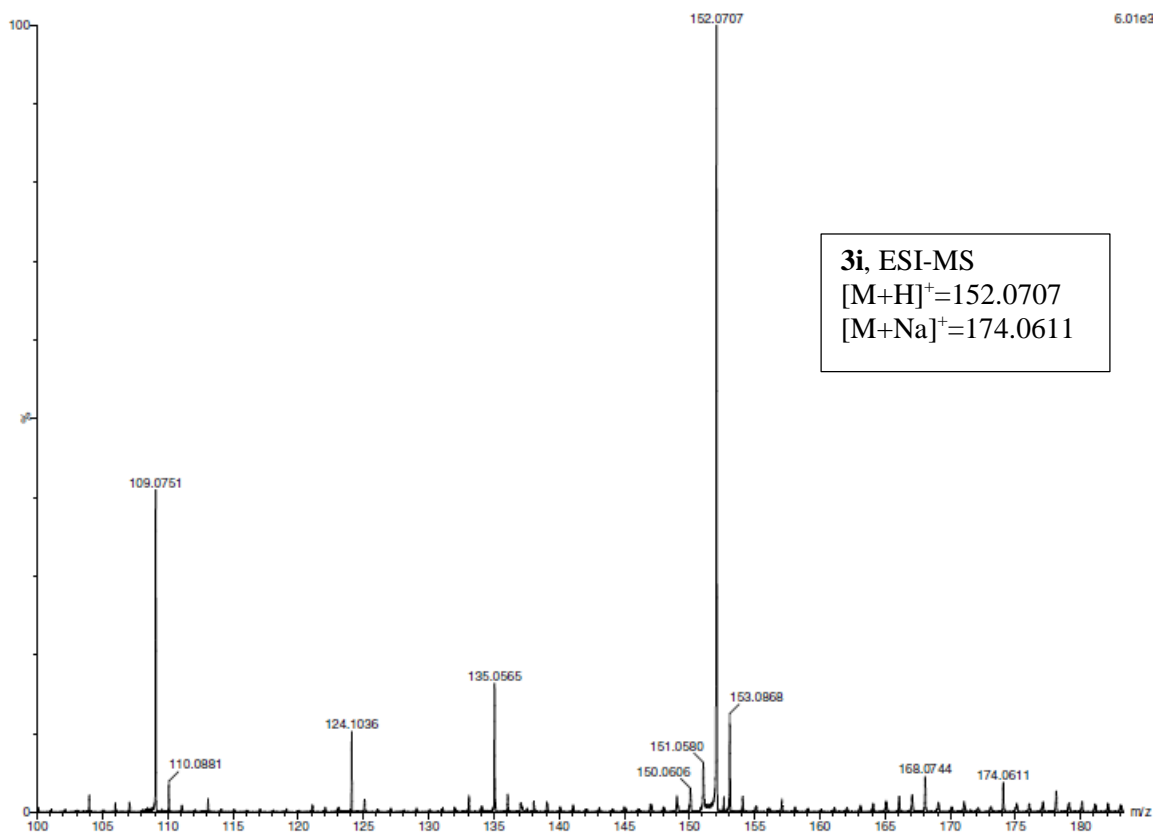

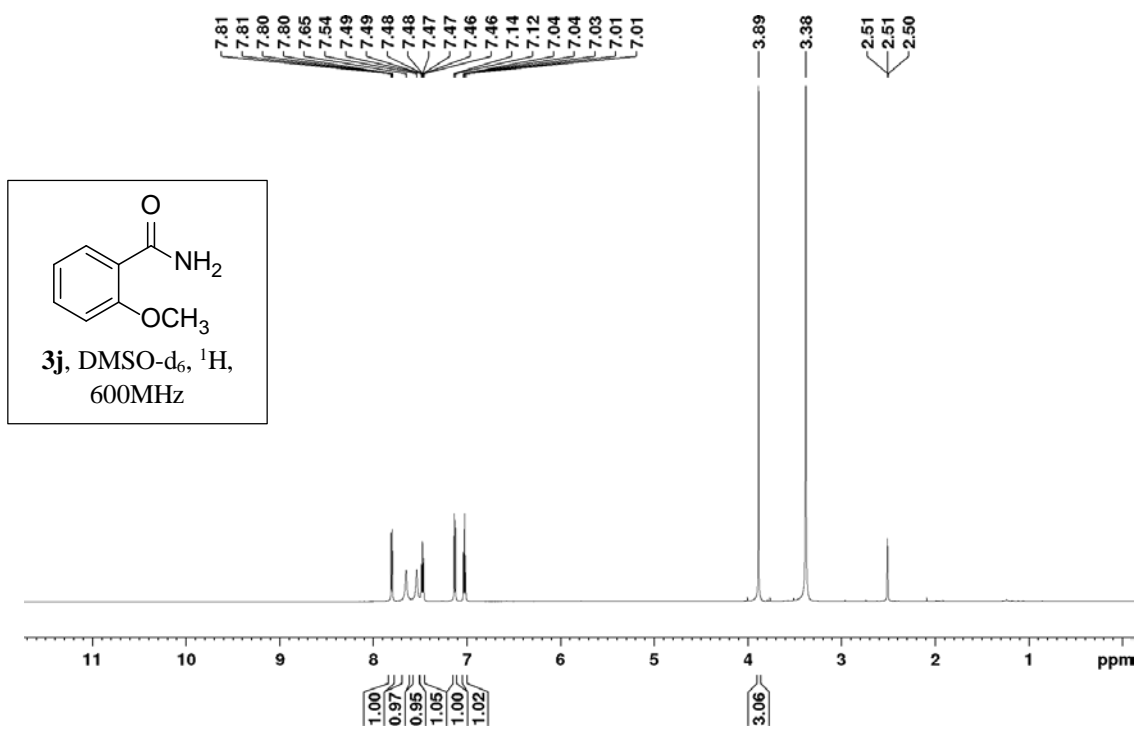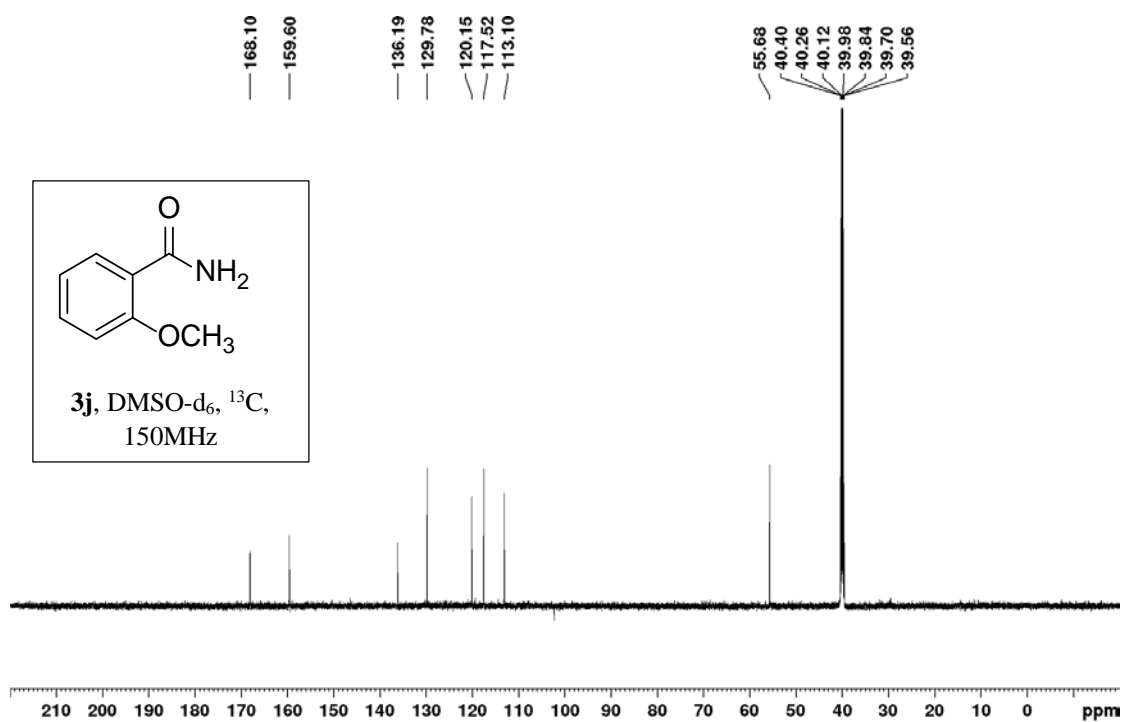

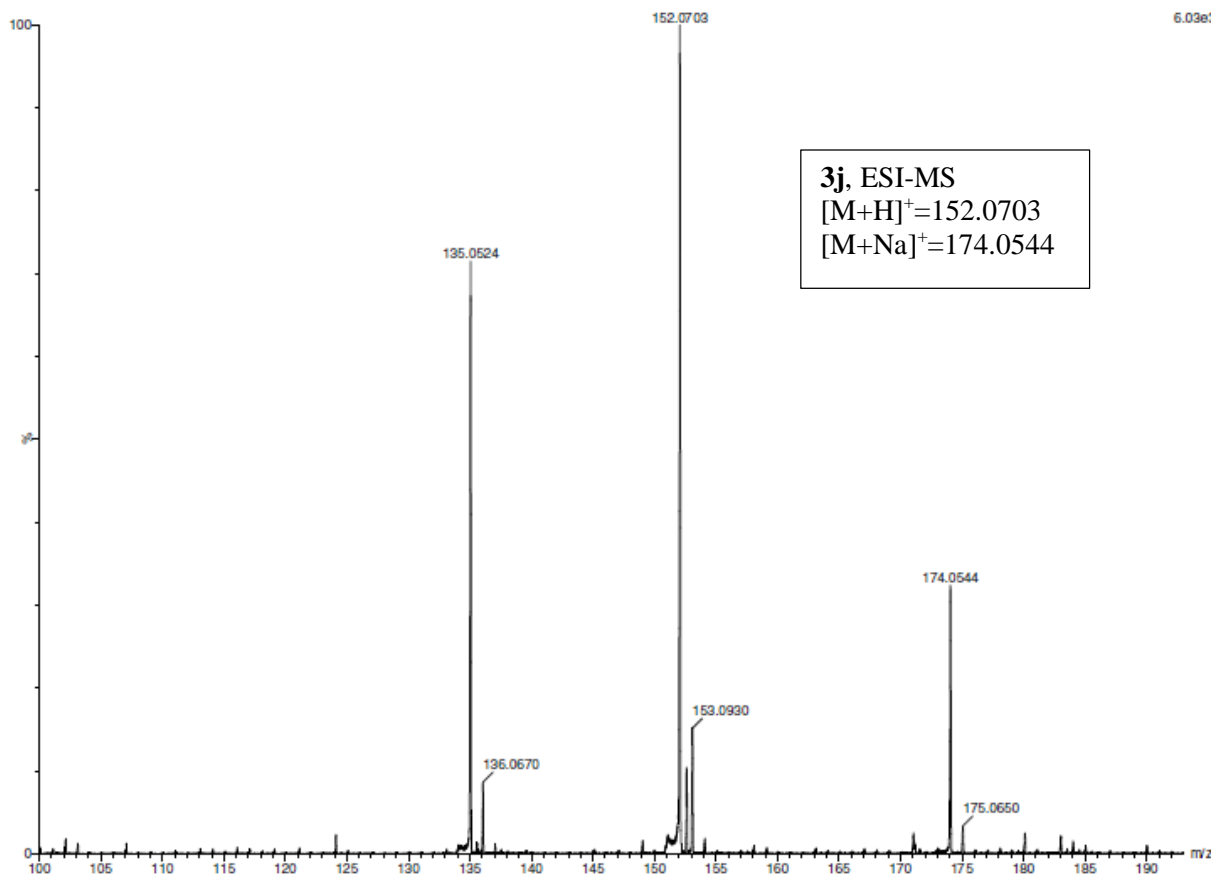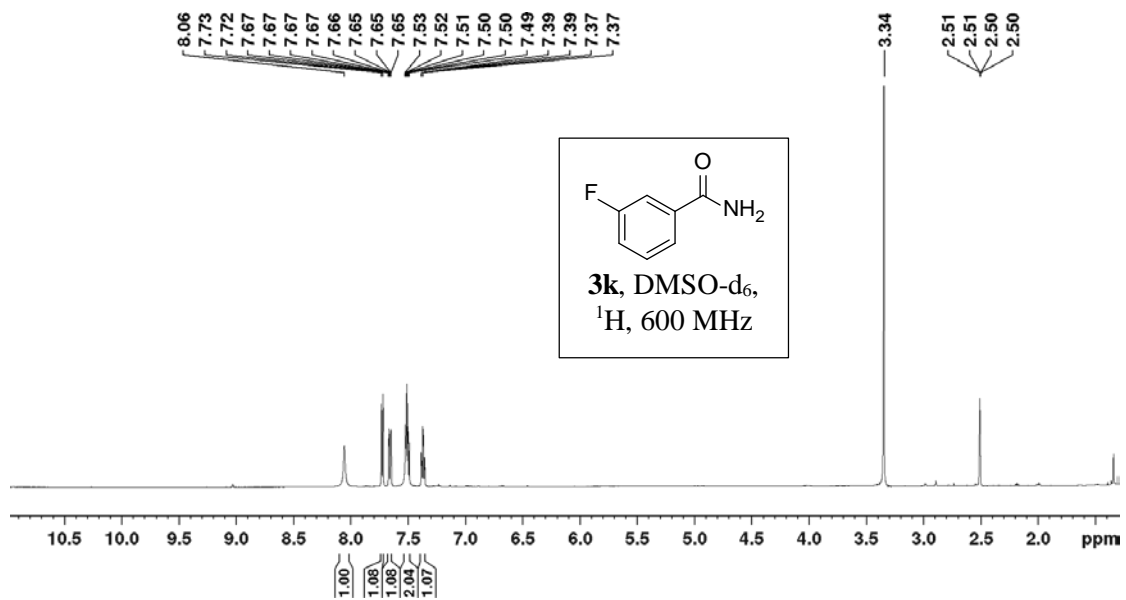

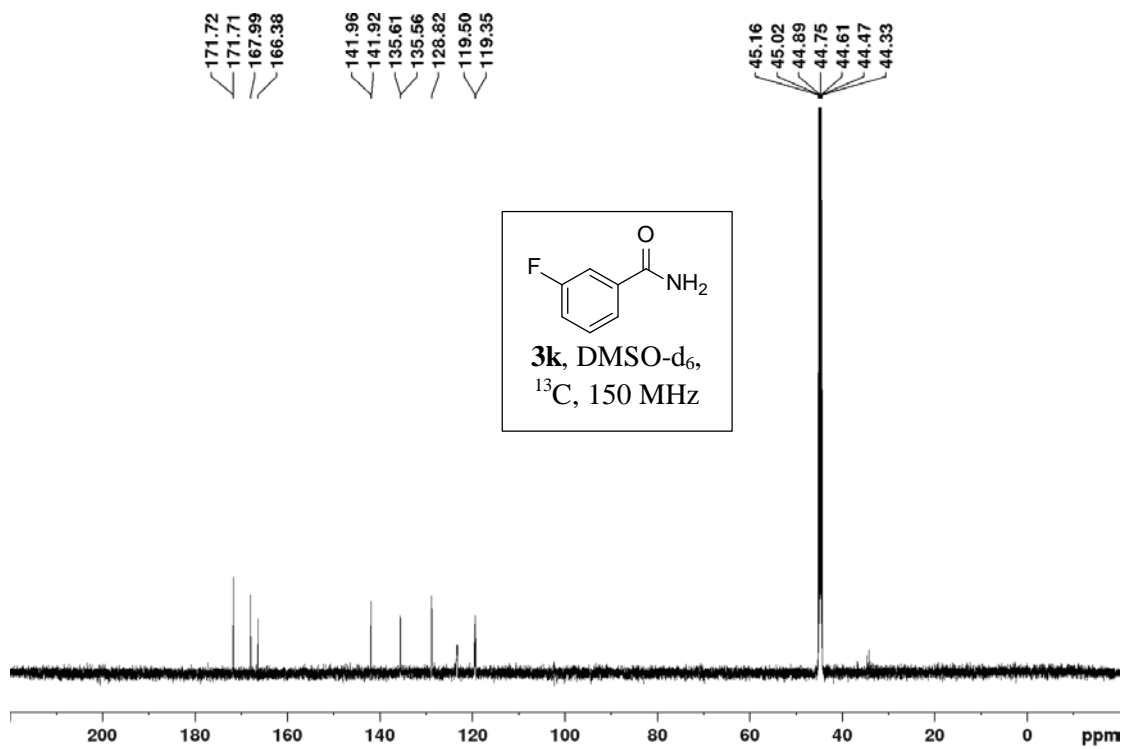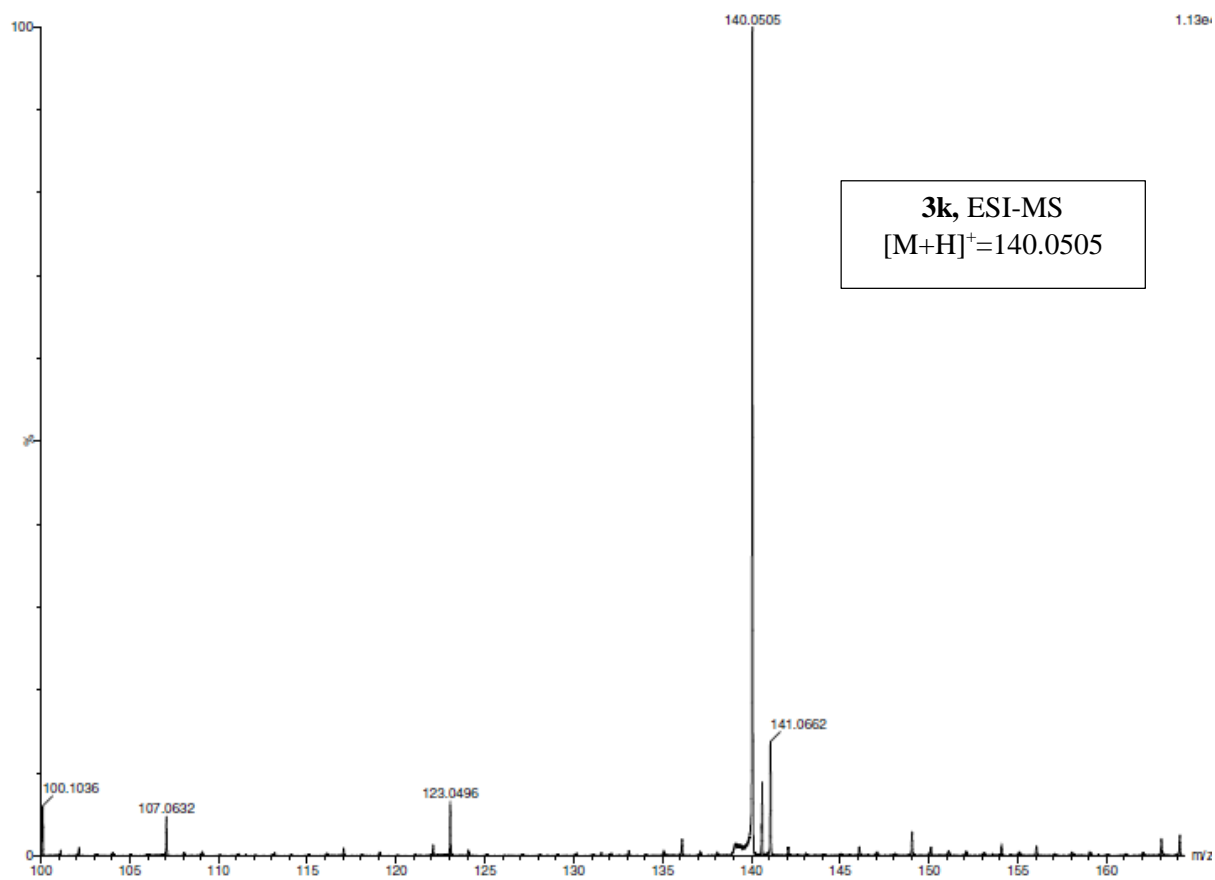

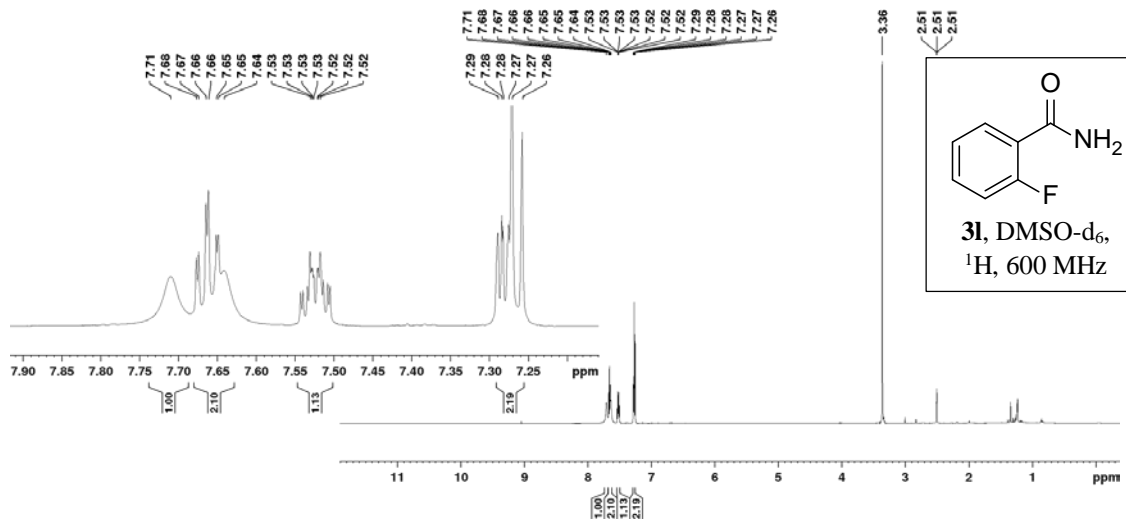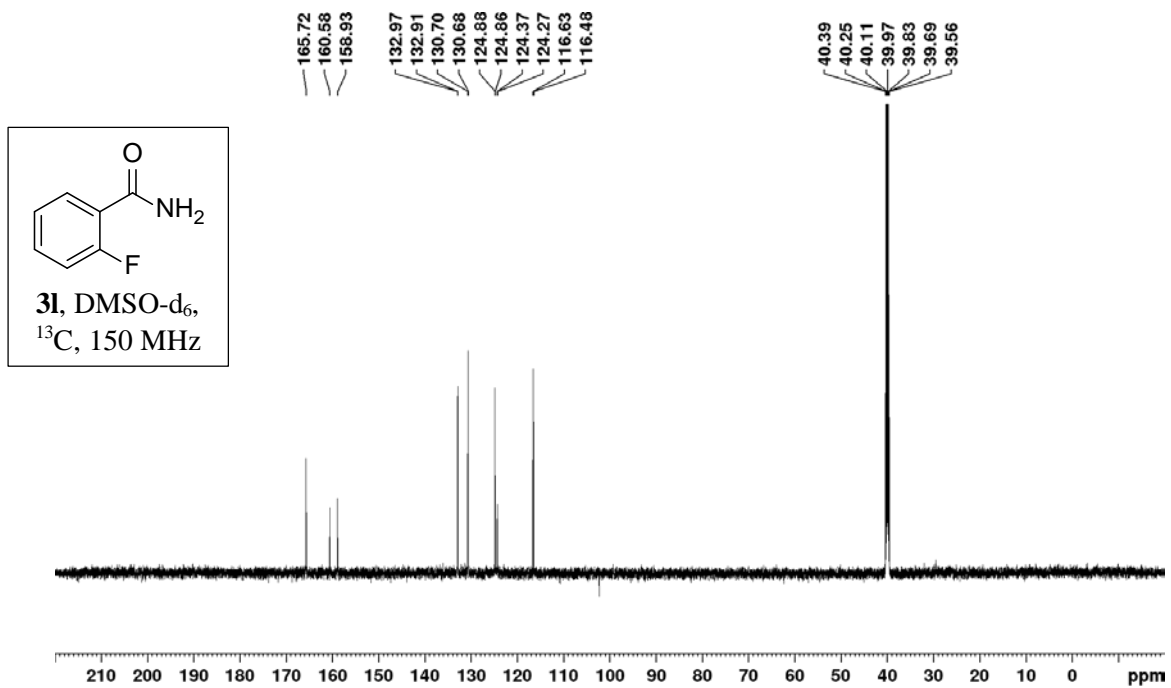

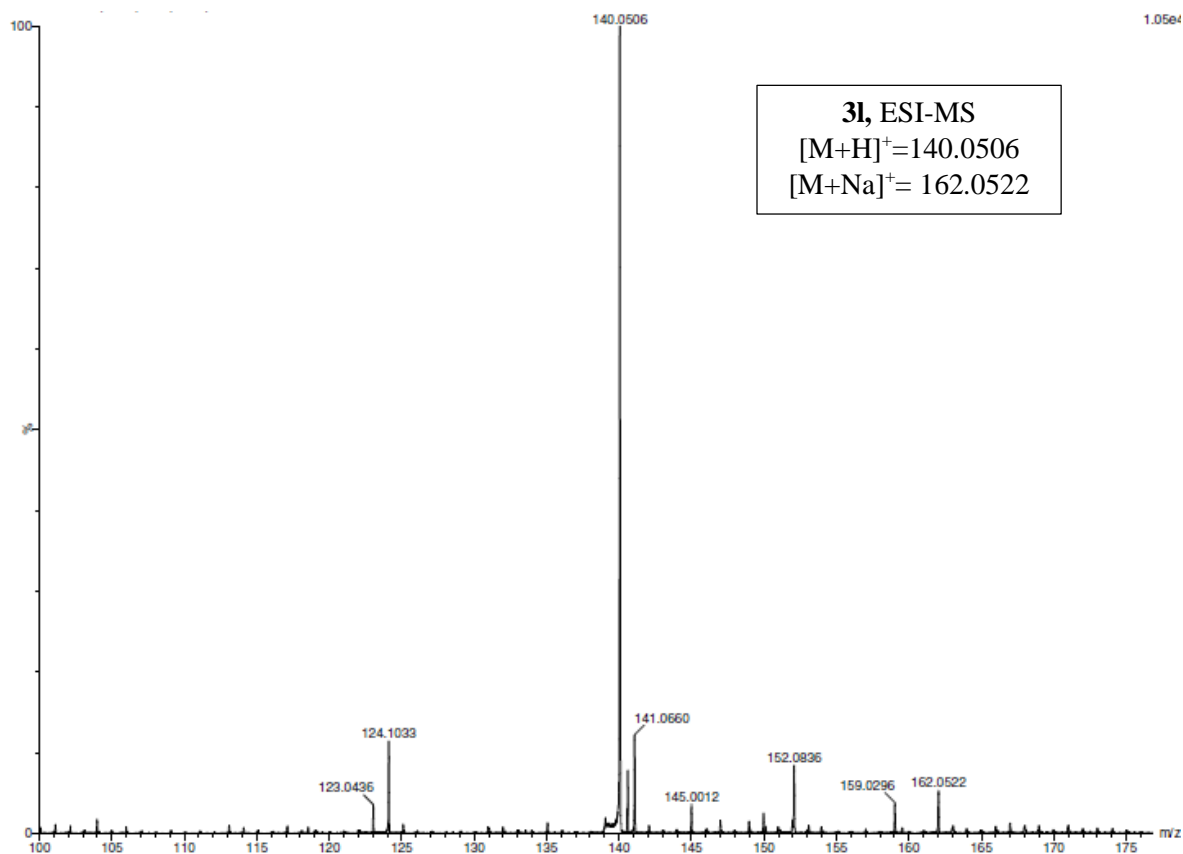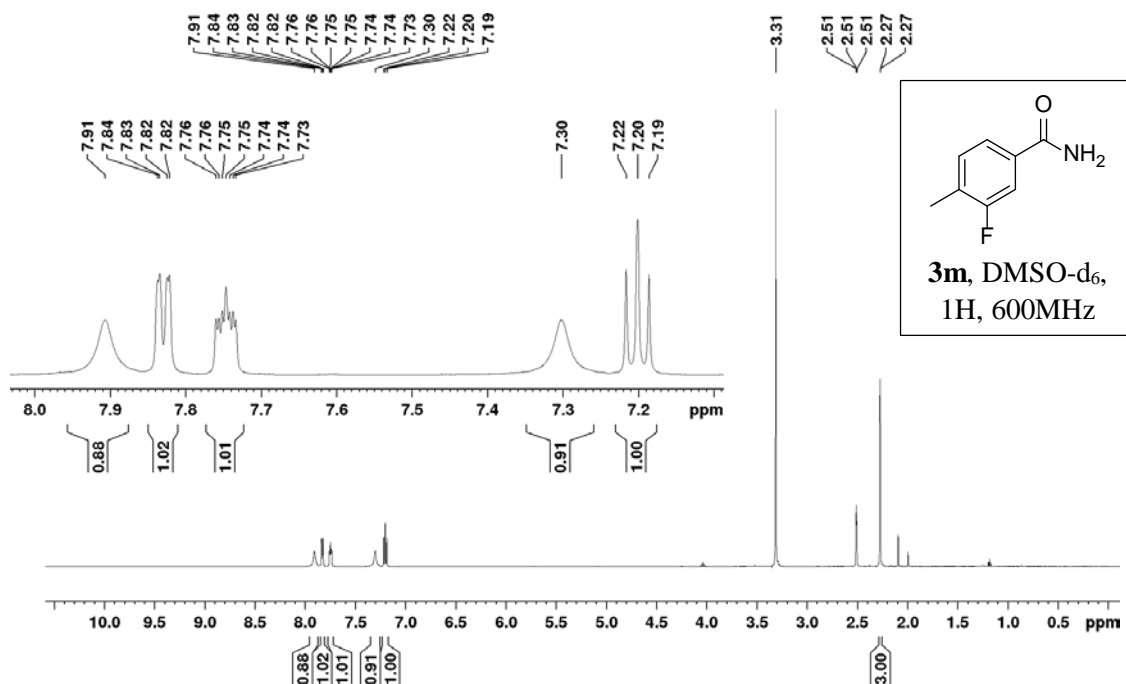



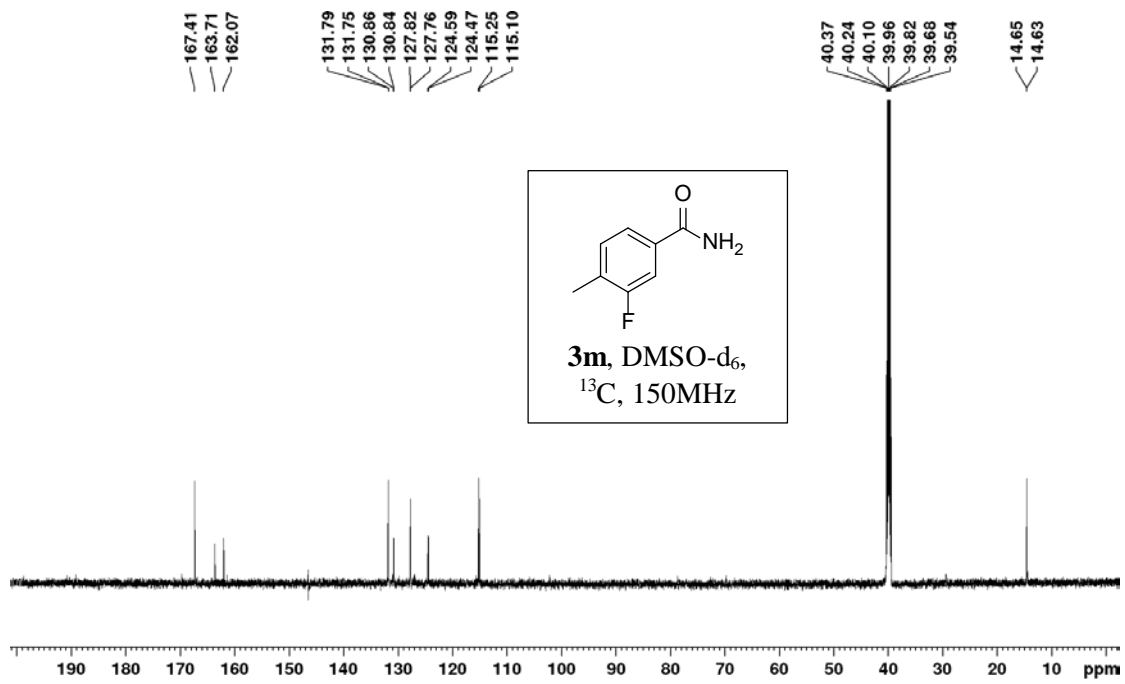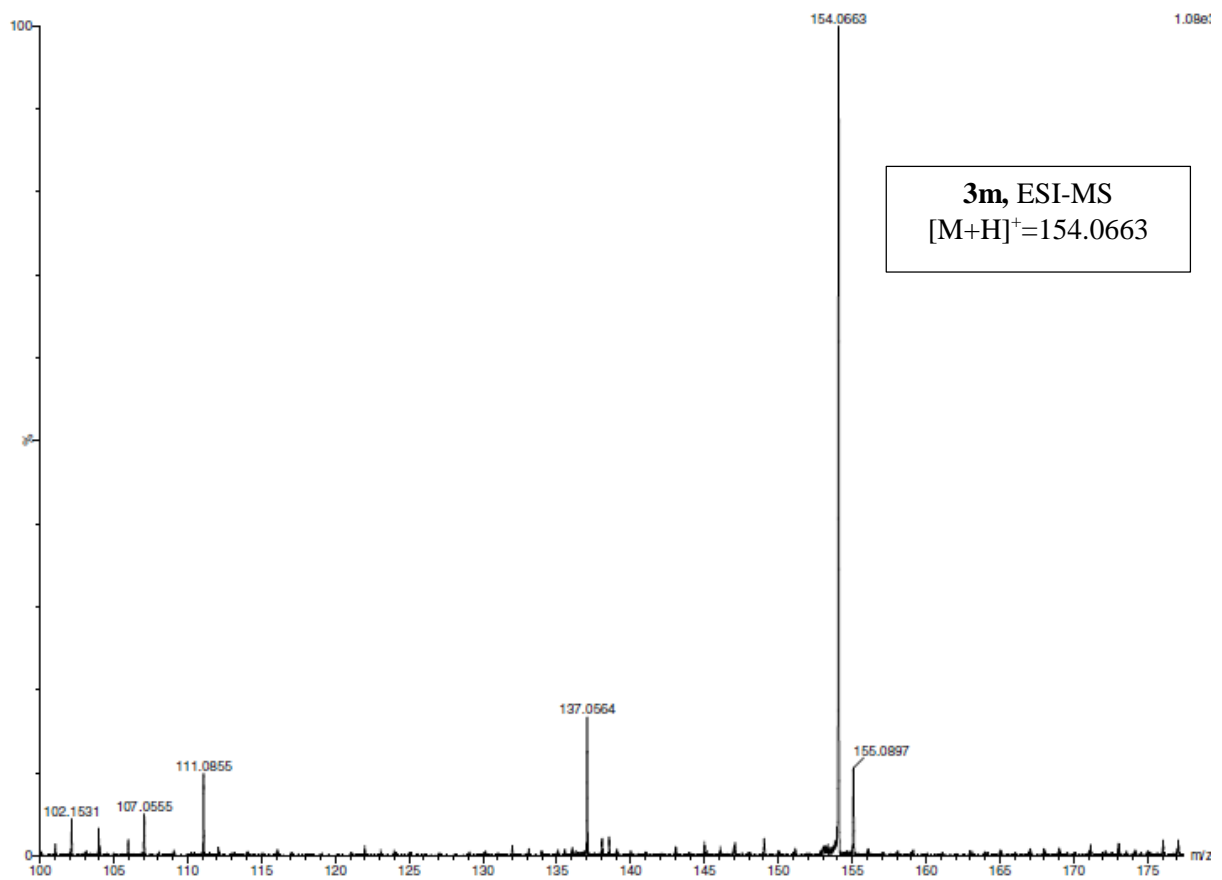

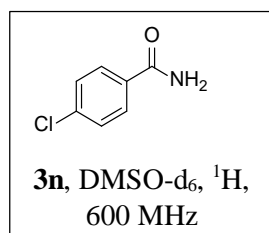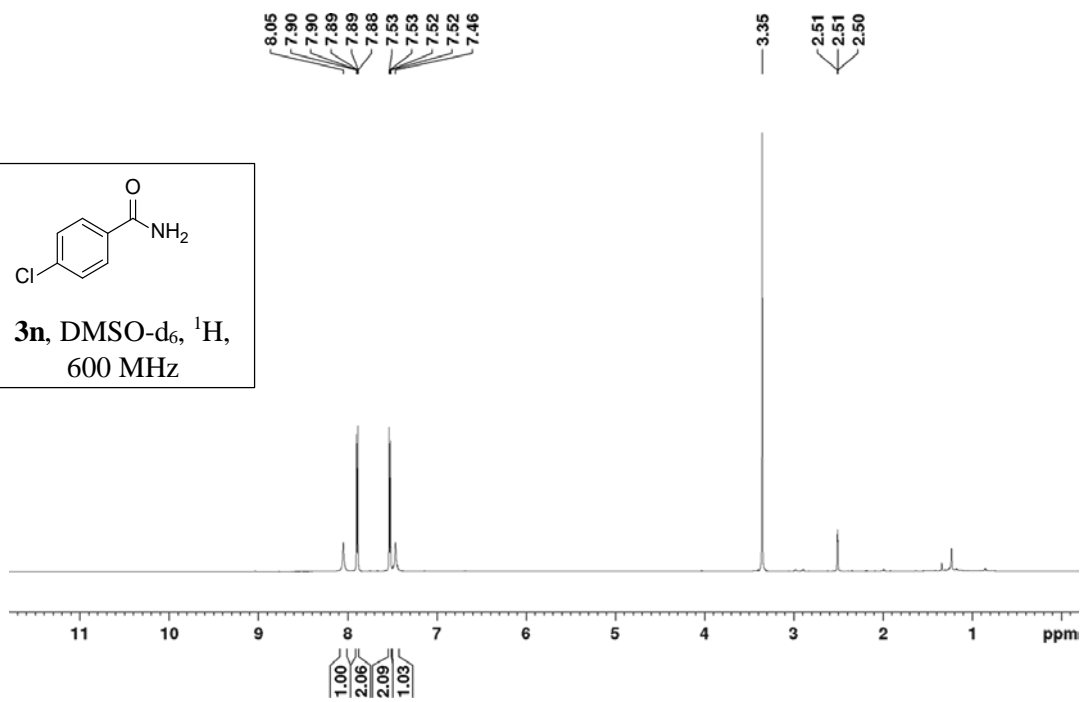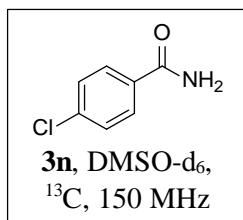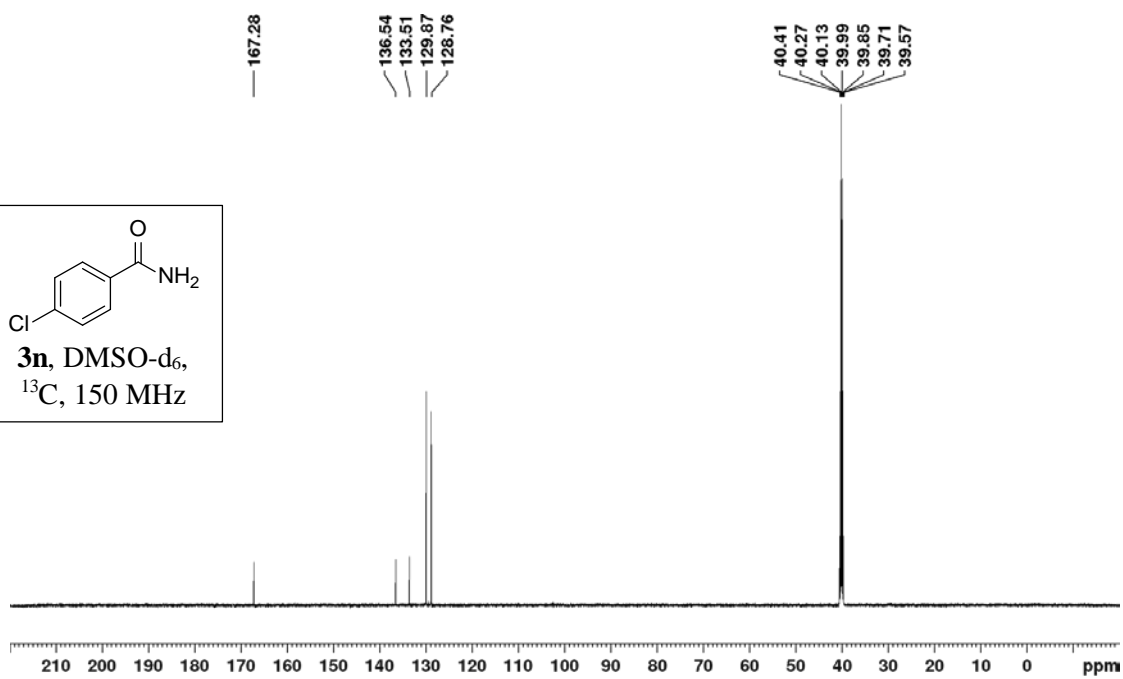

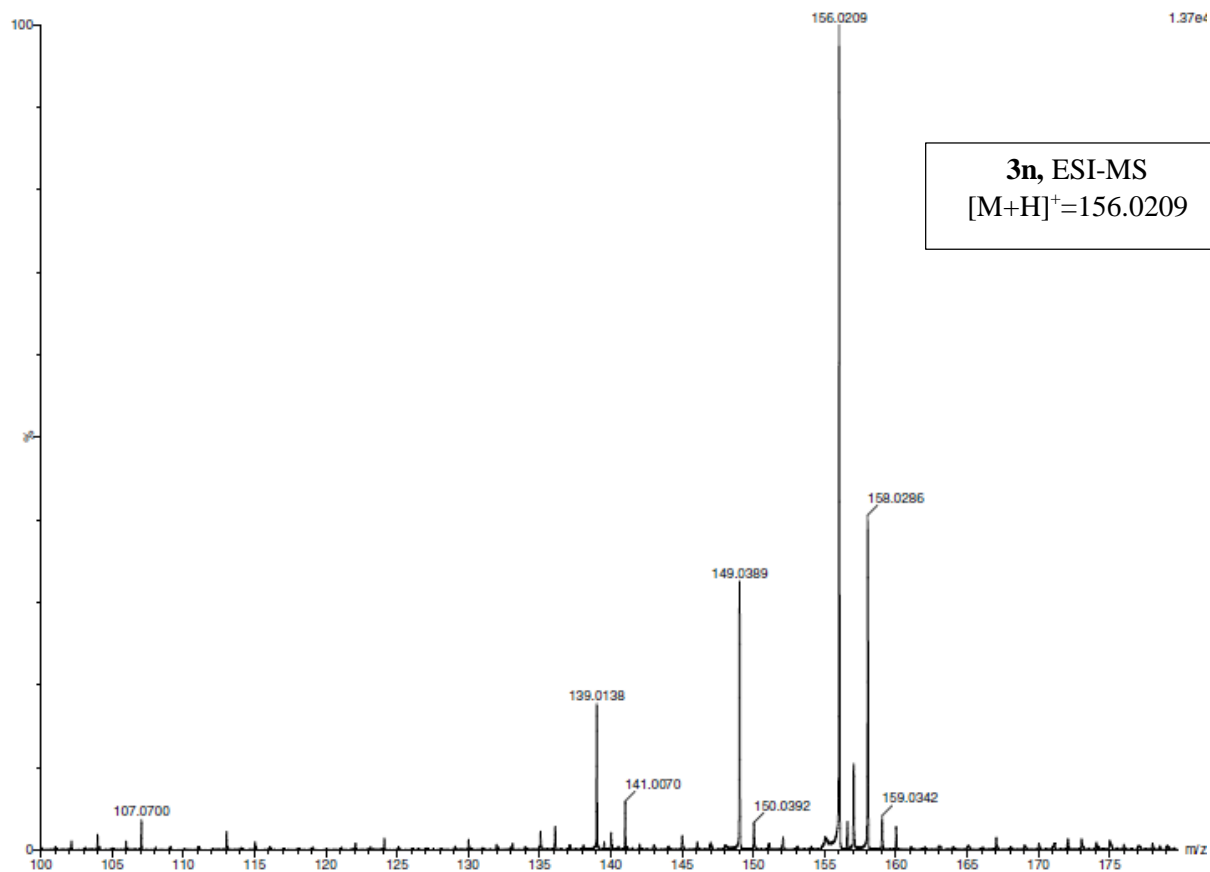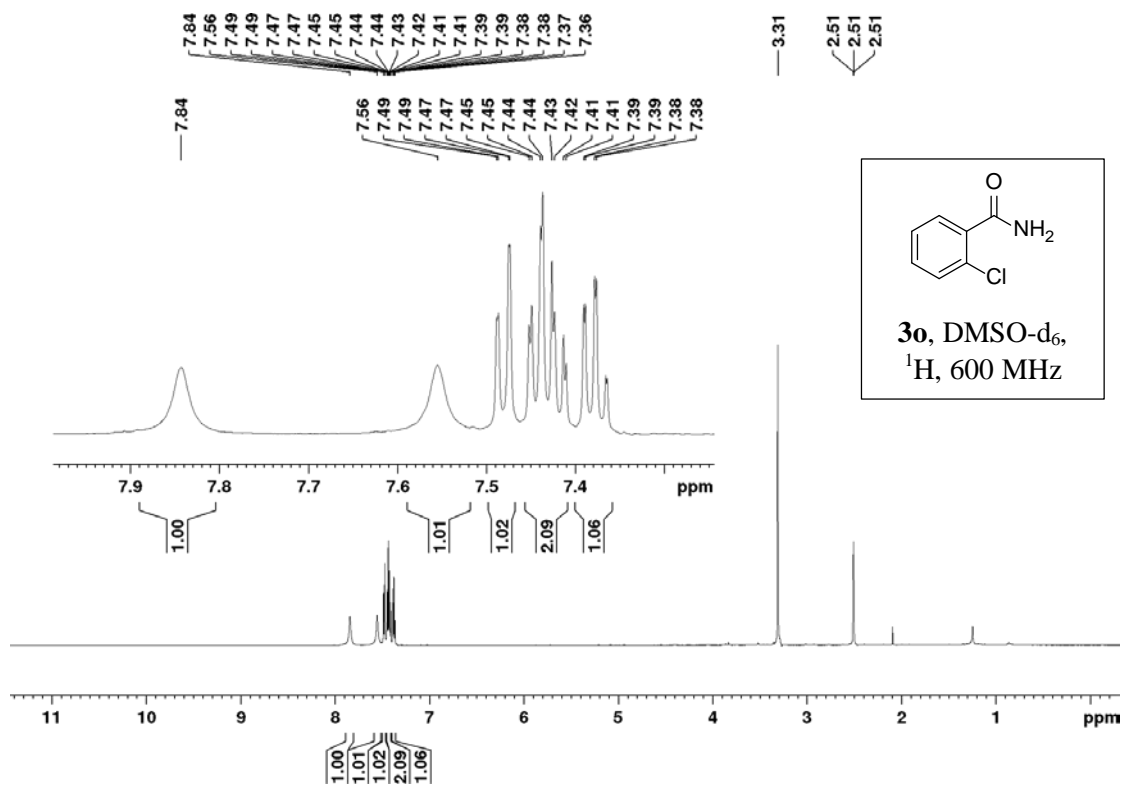

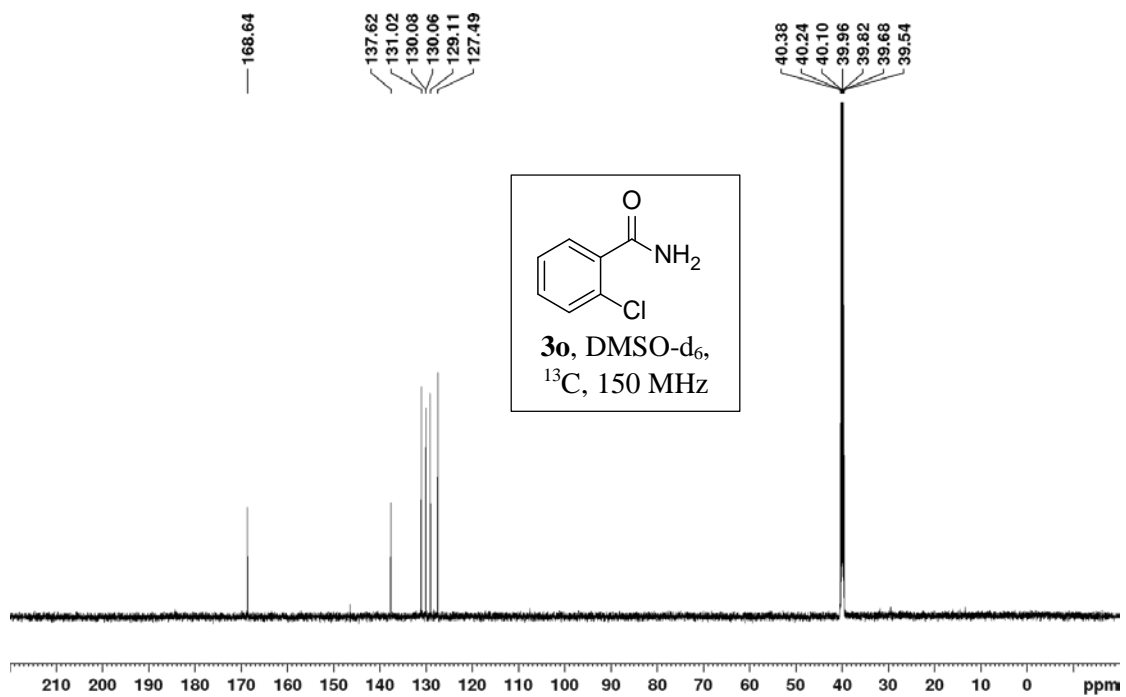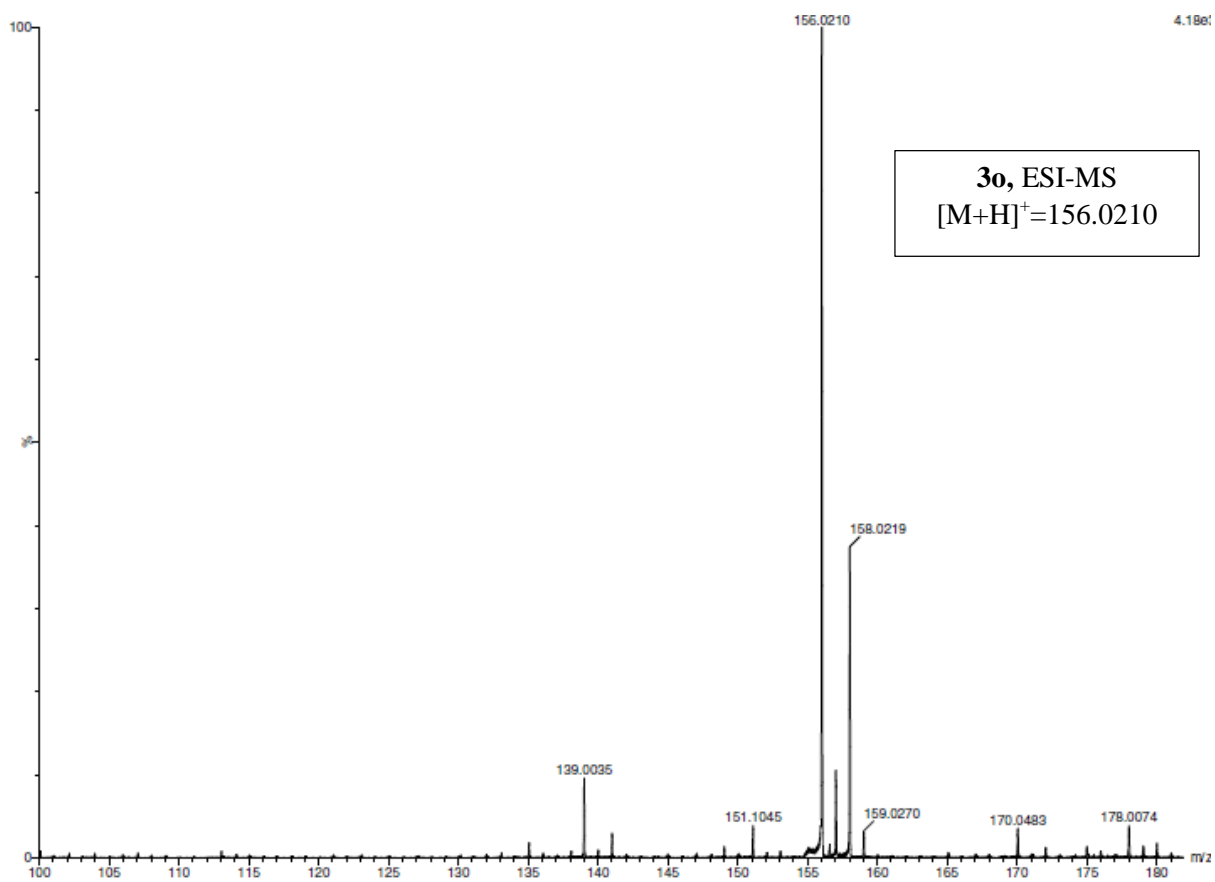

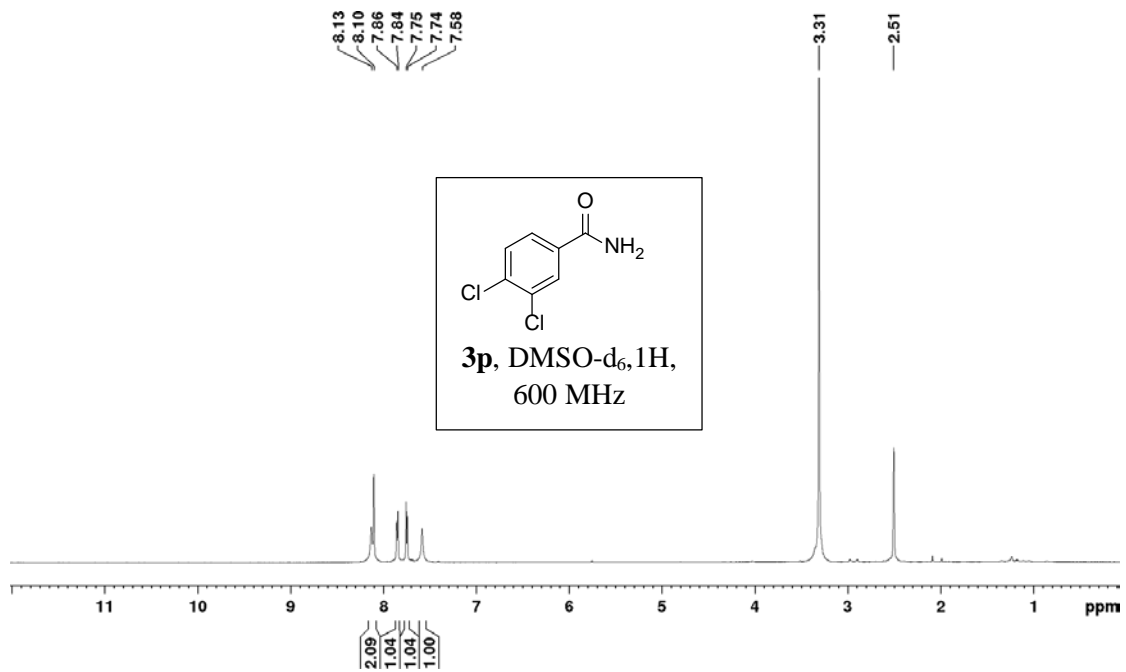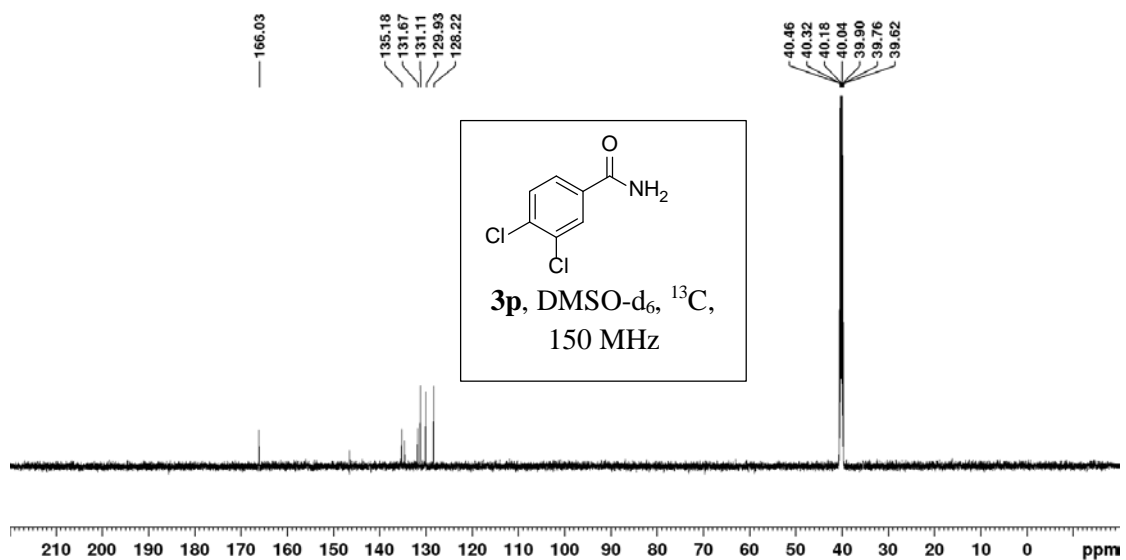

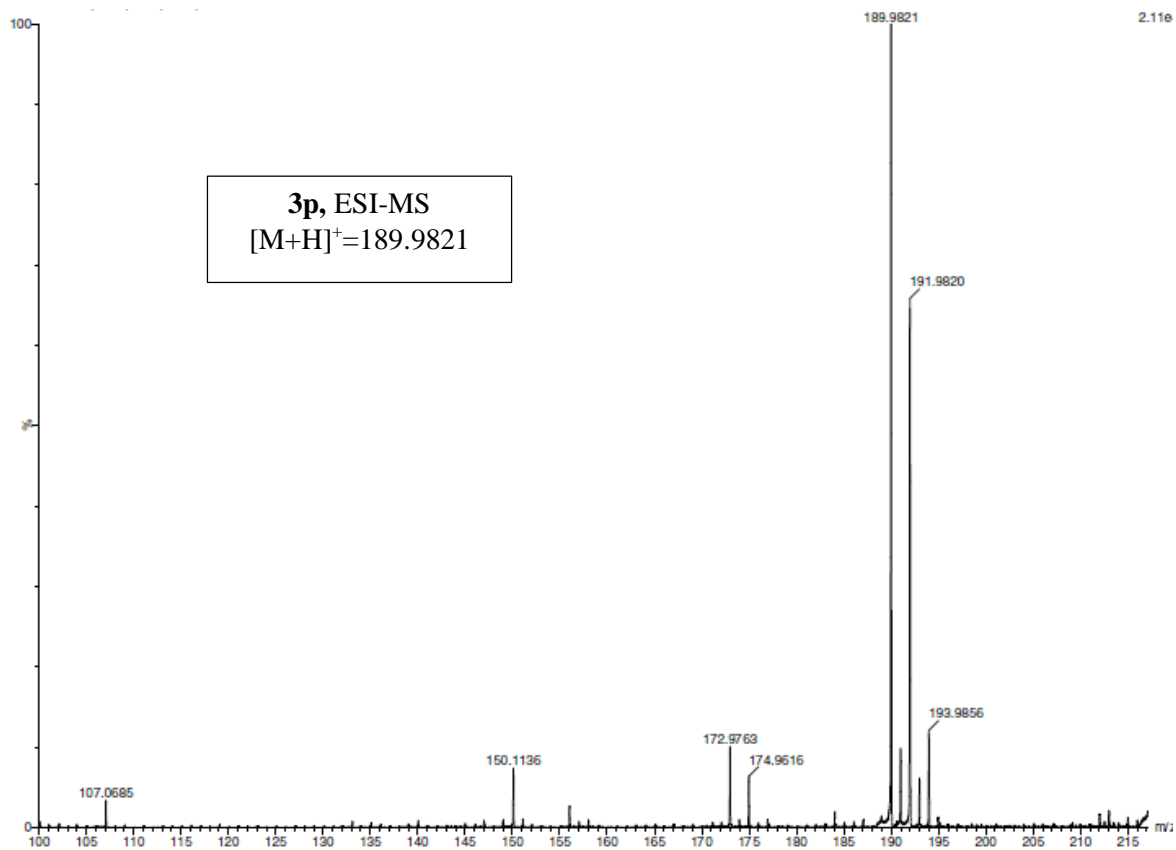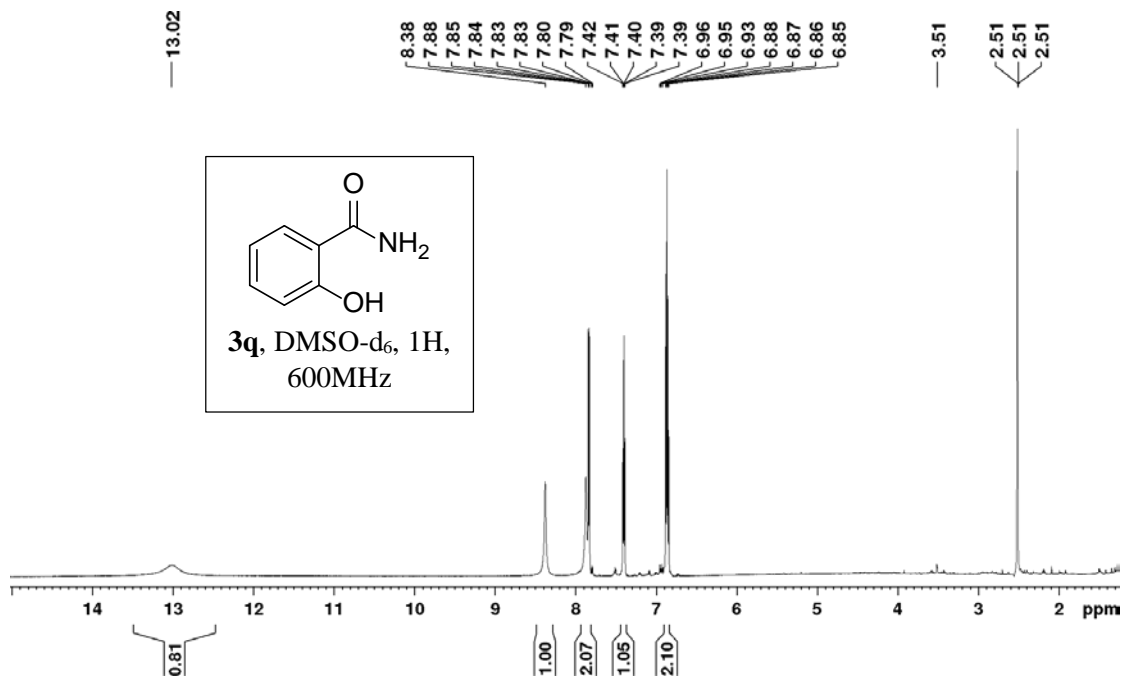

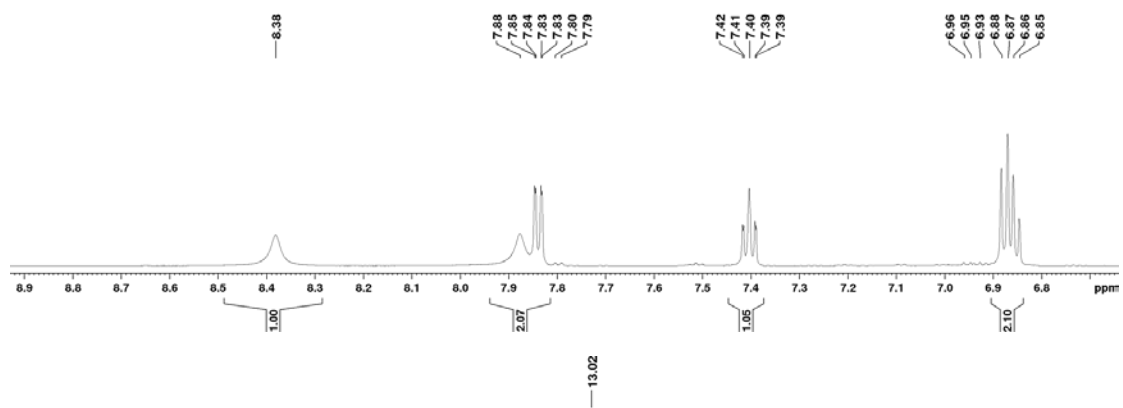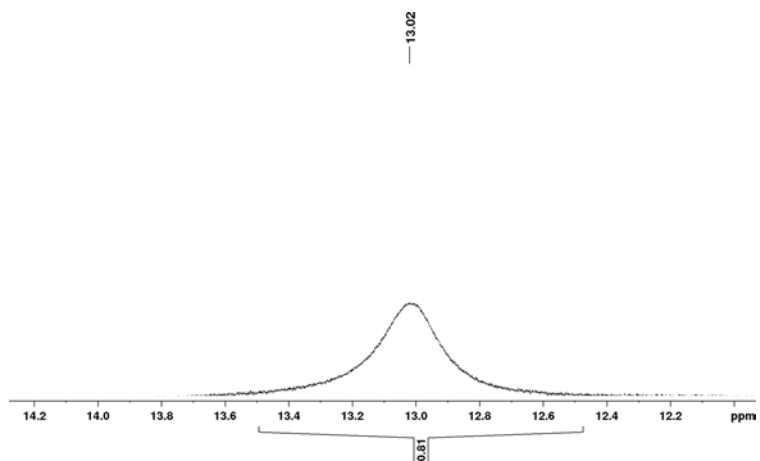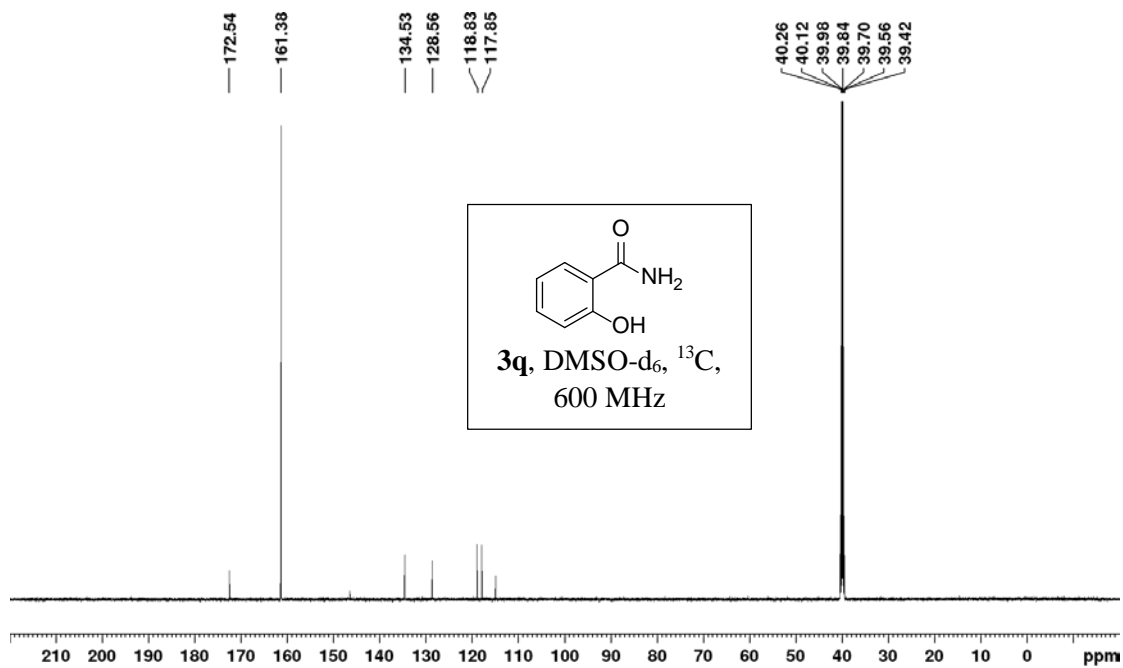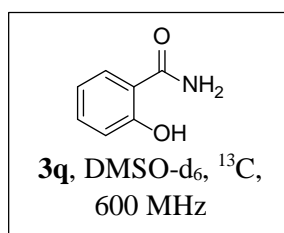

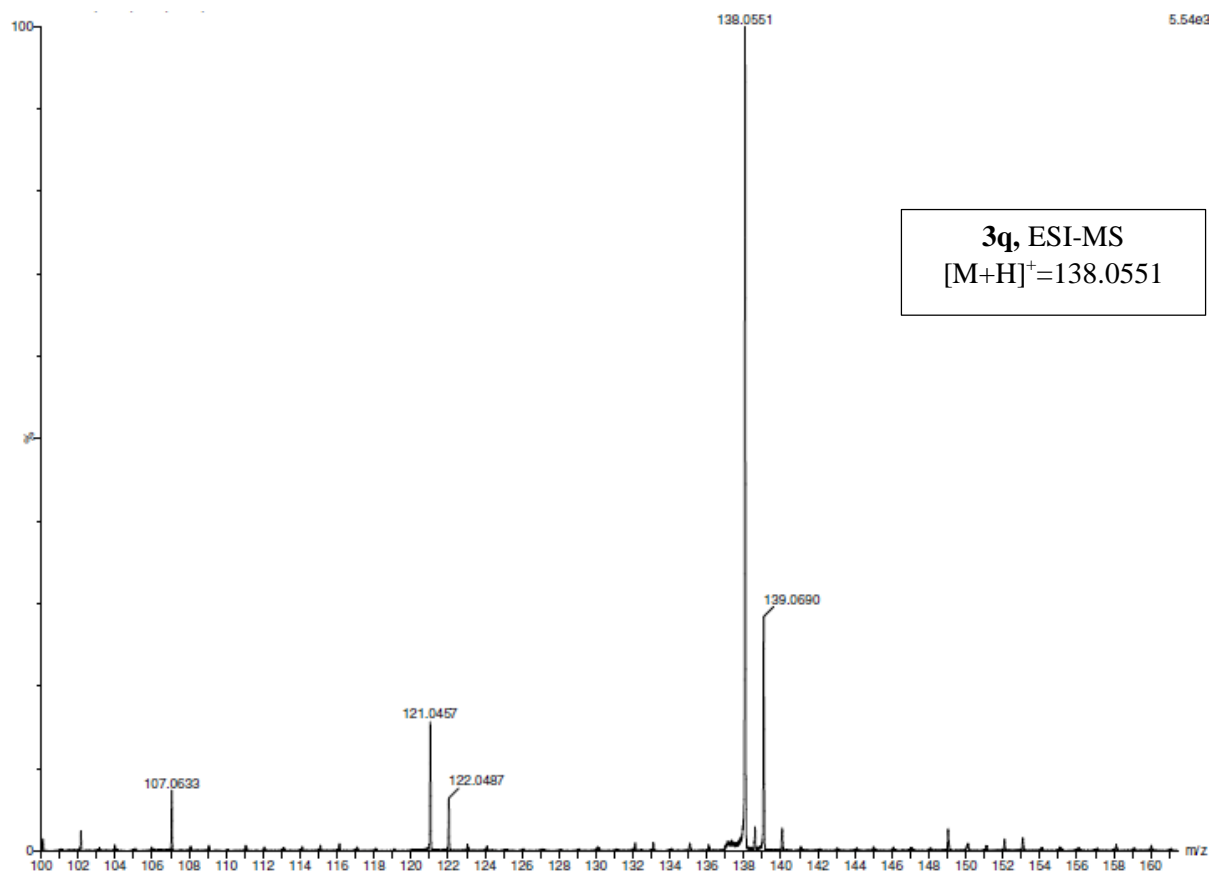

**3q**, ESI-MS  
 $[M+H]^+ = 138.0551$

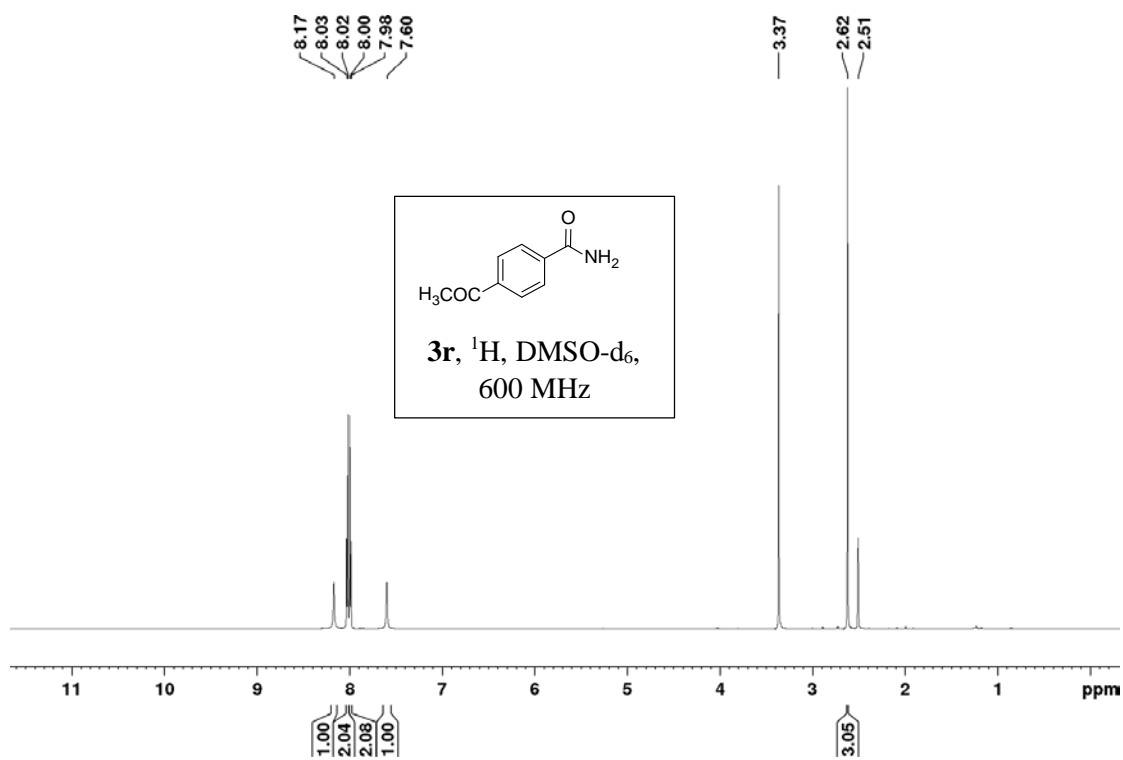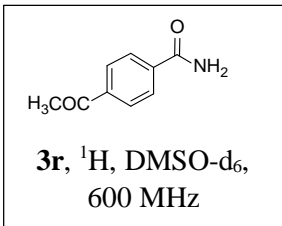



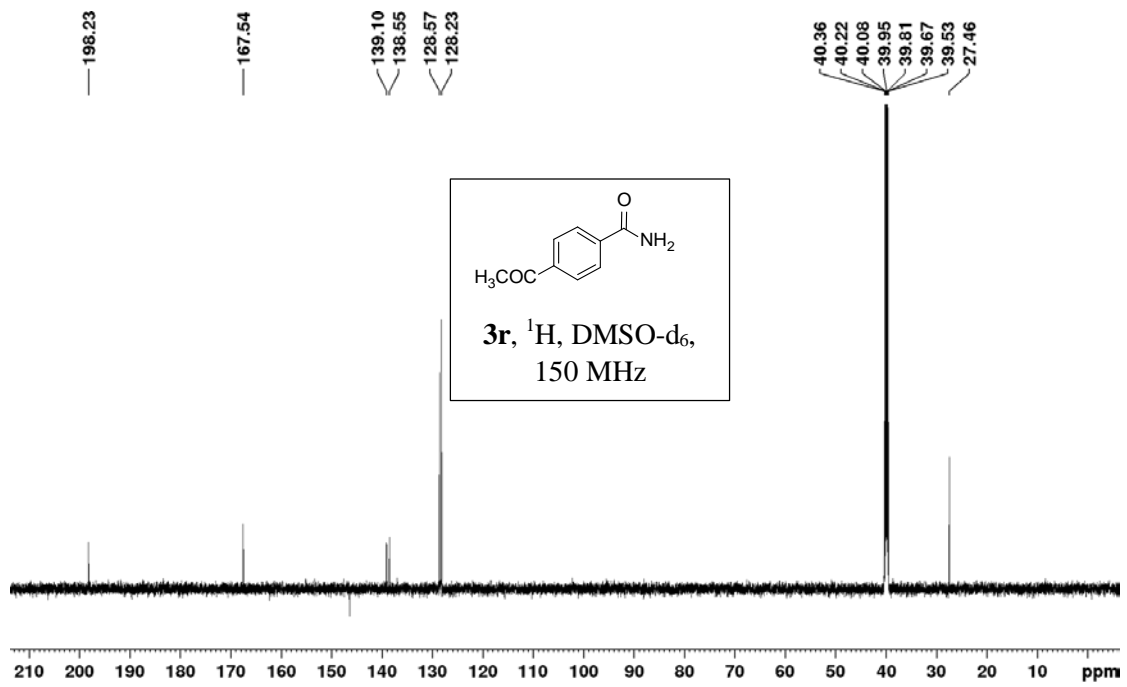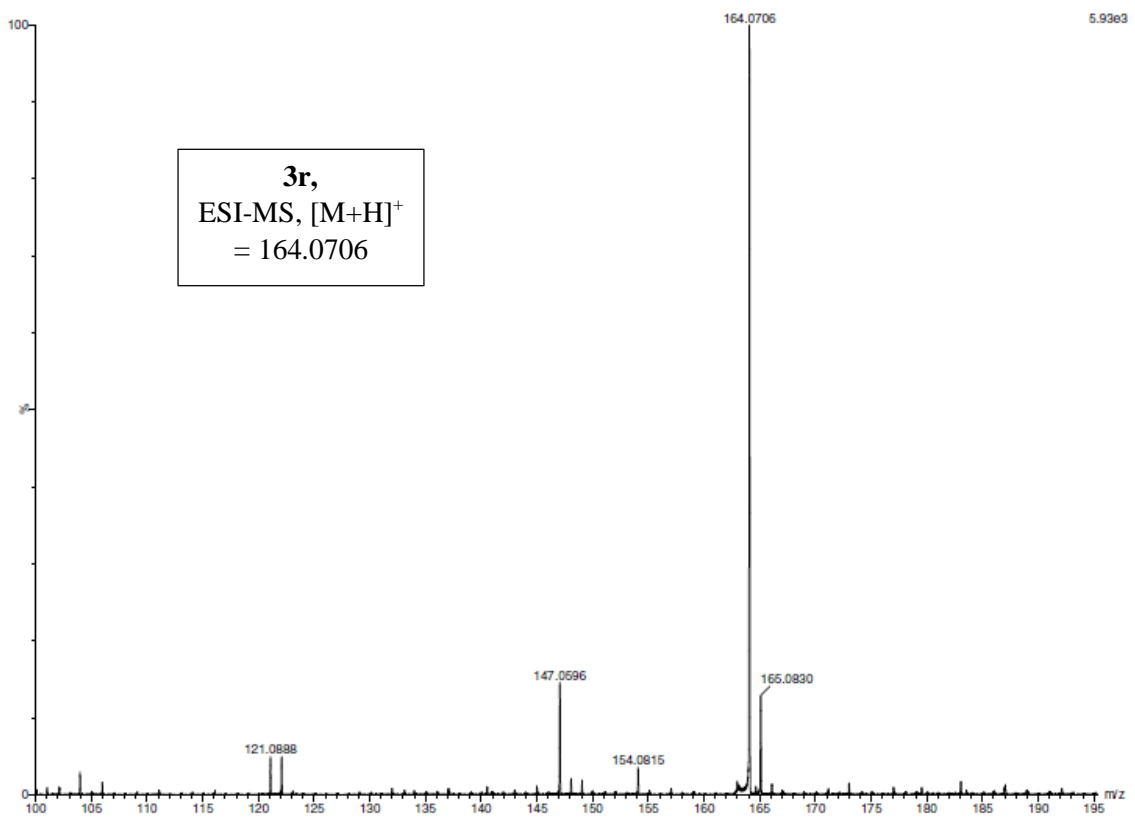

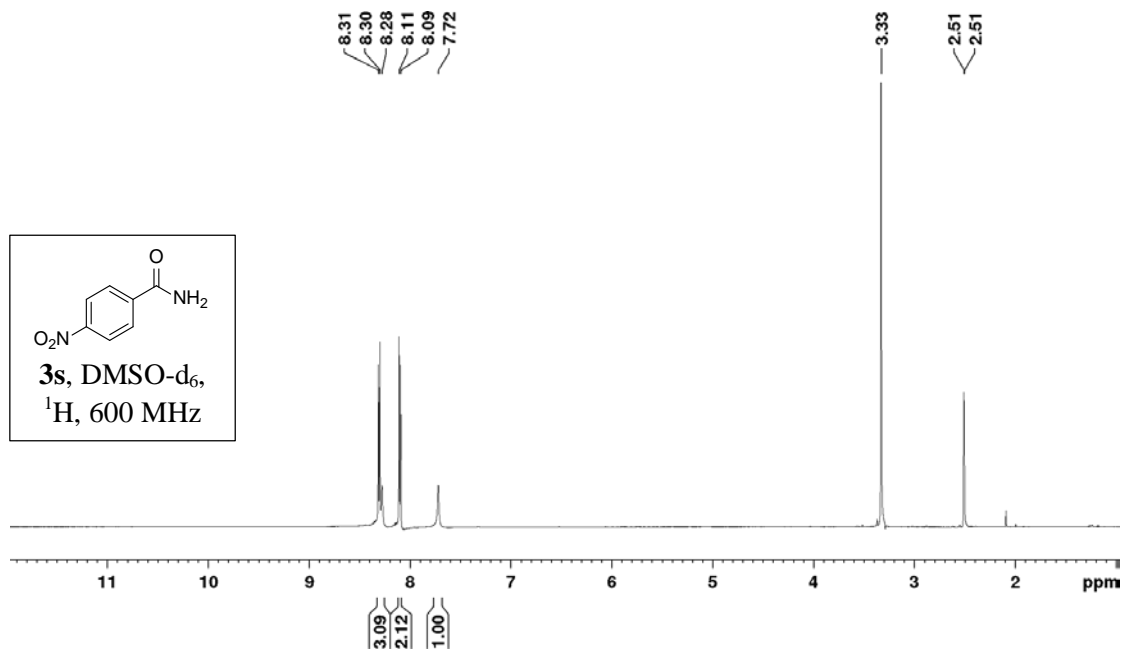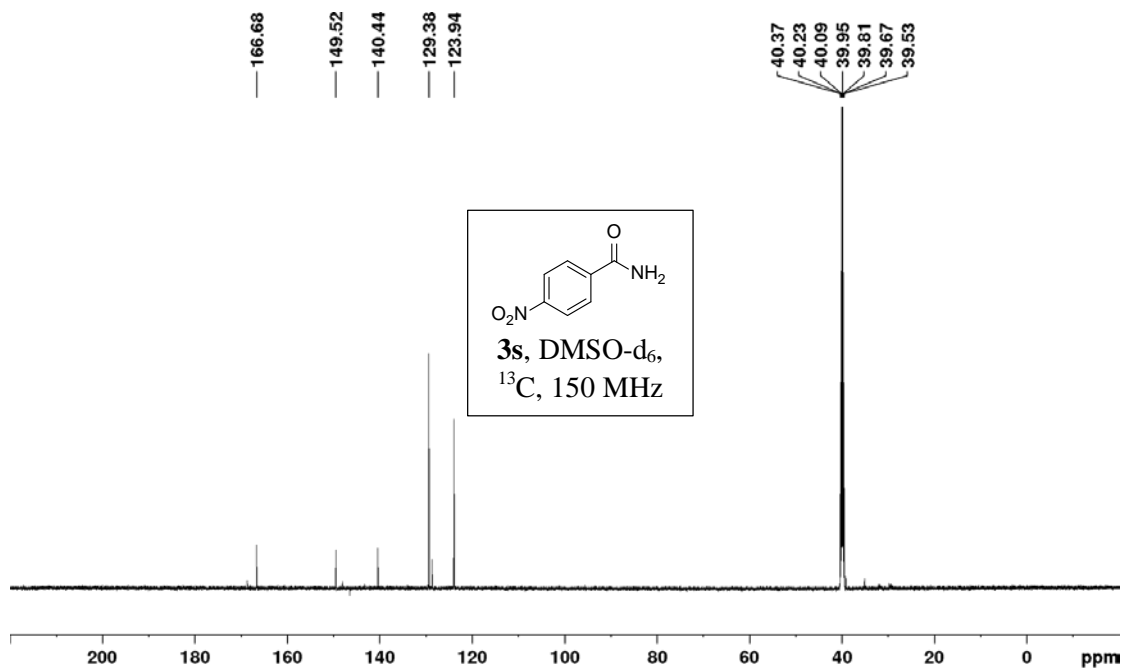

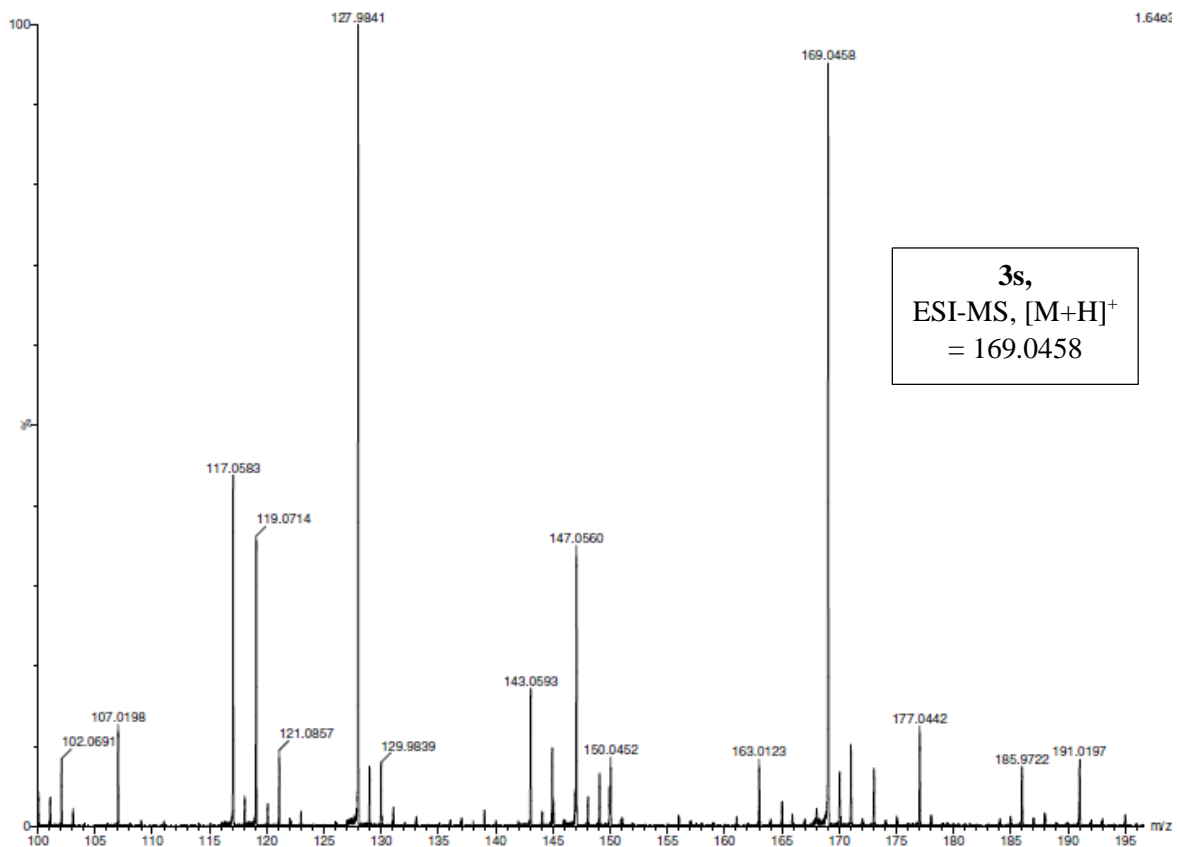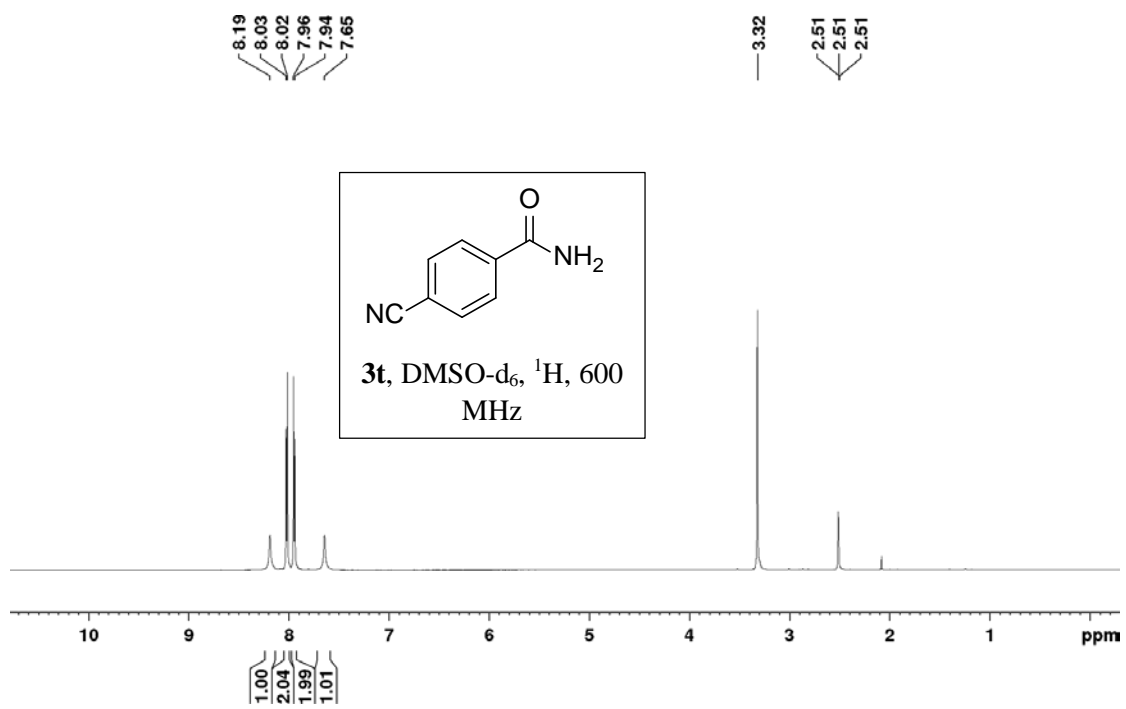

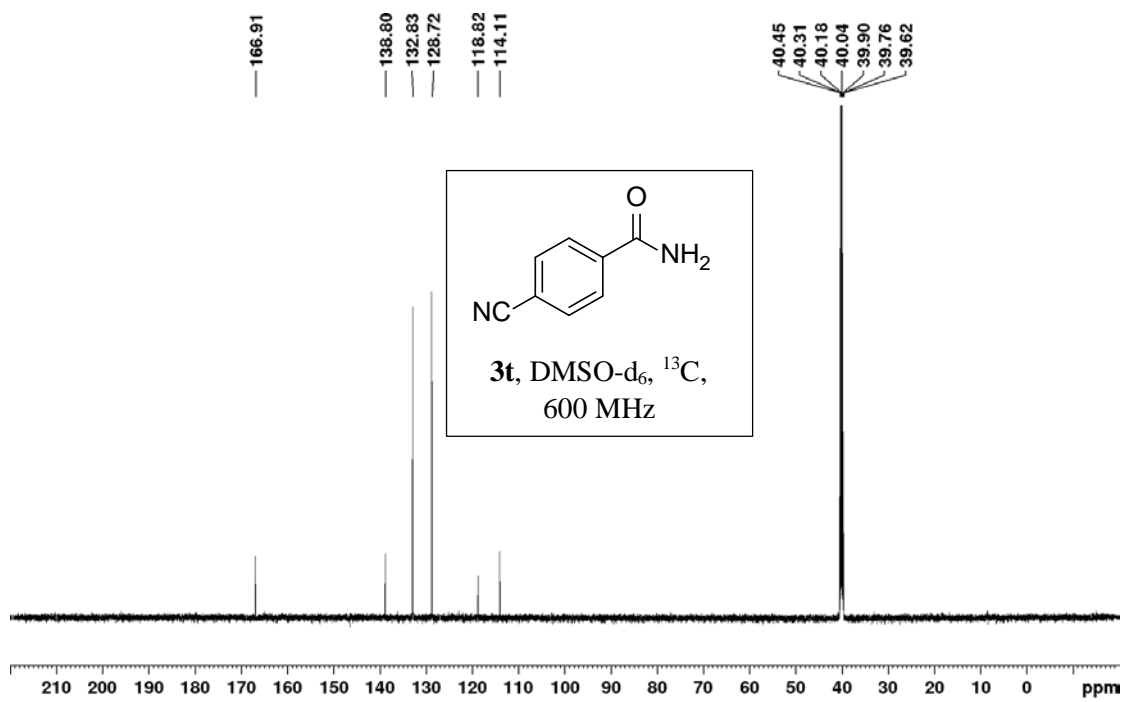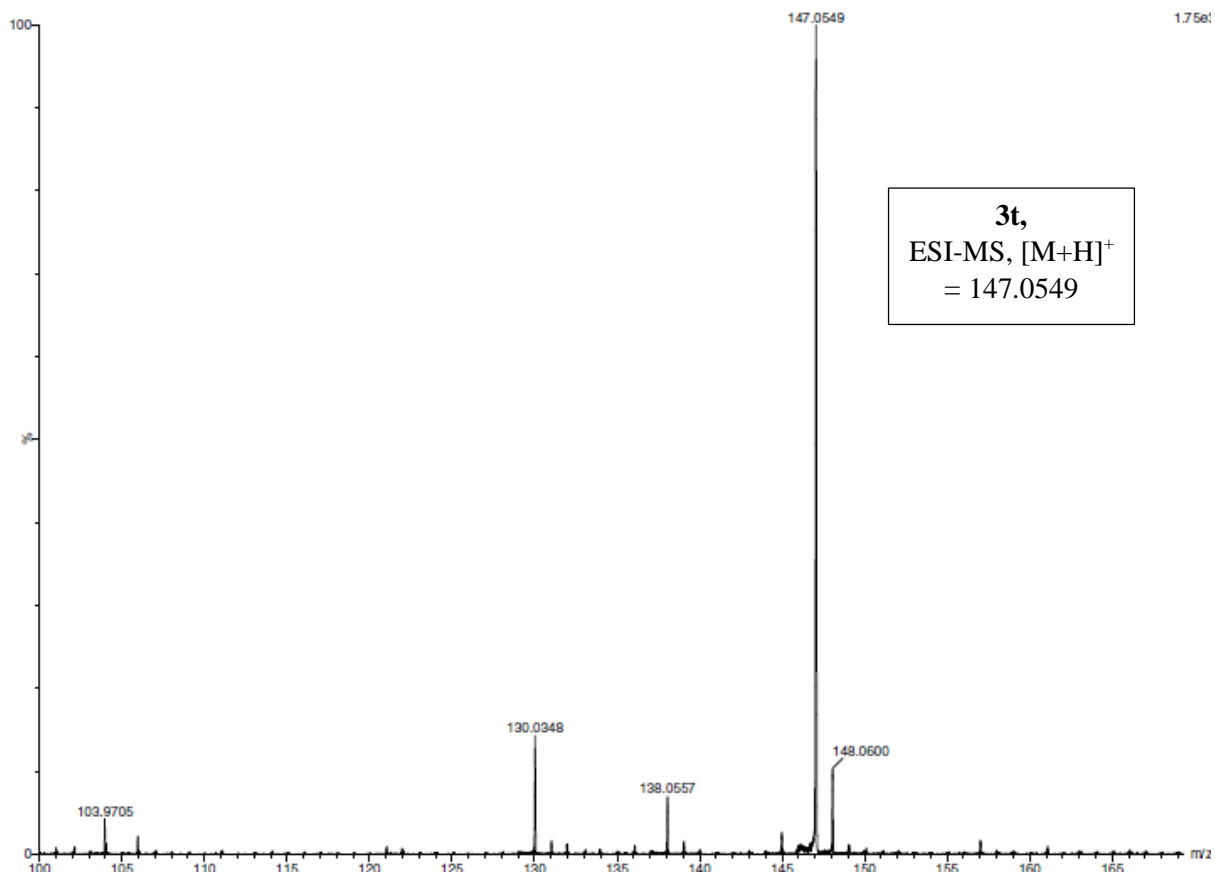

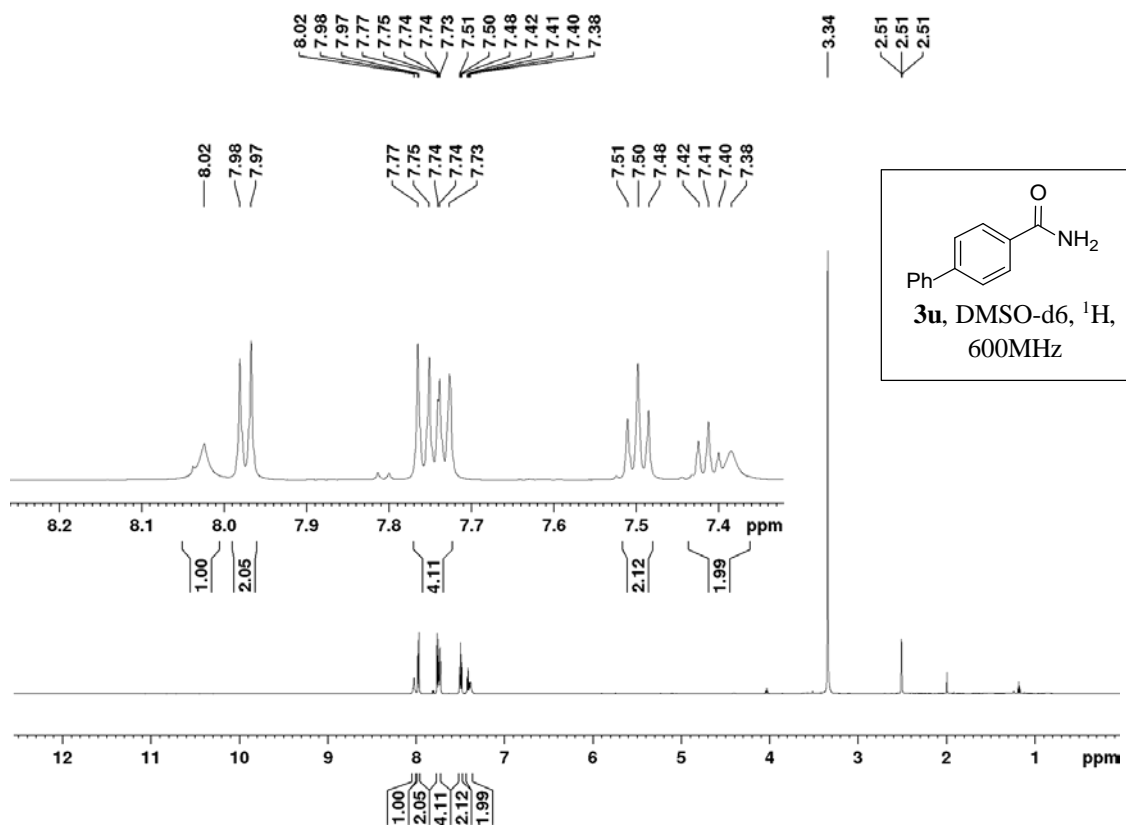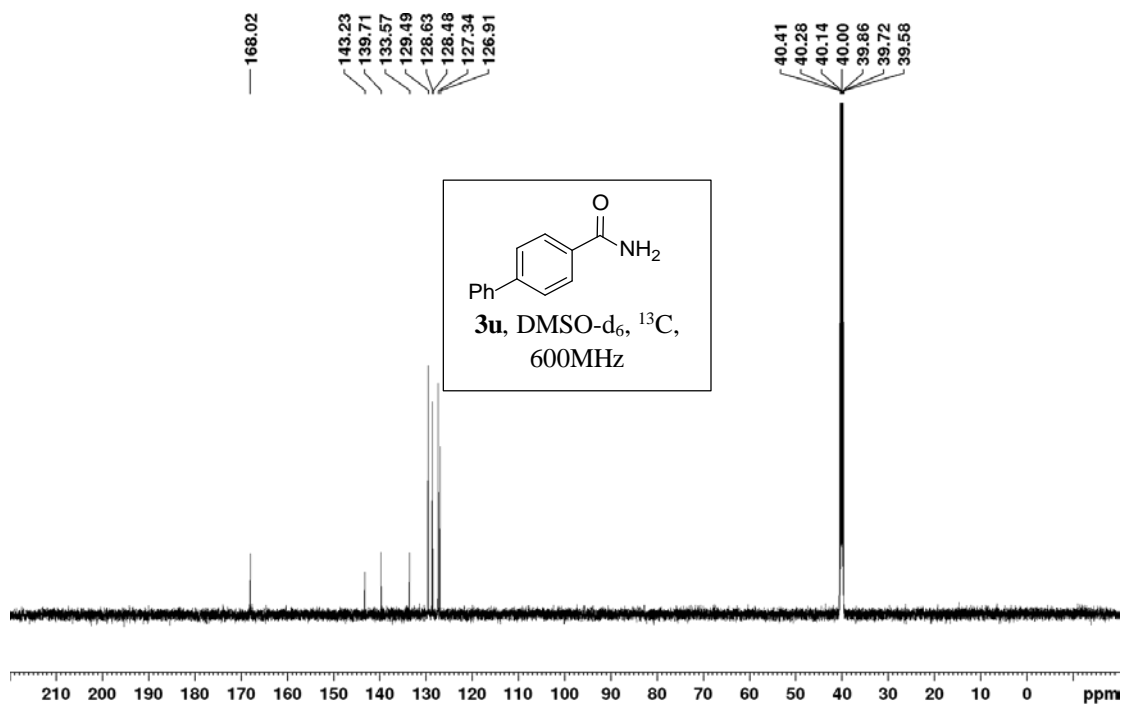

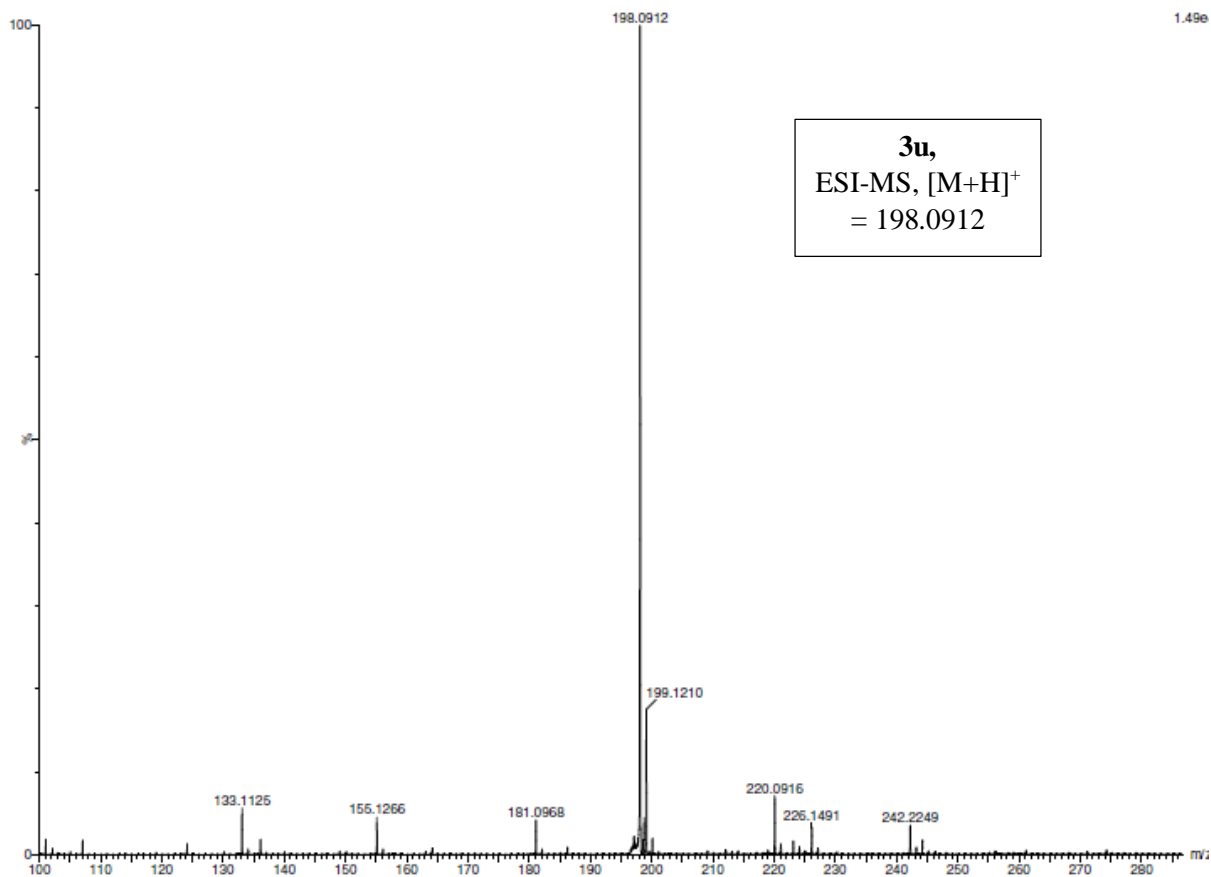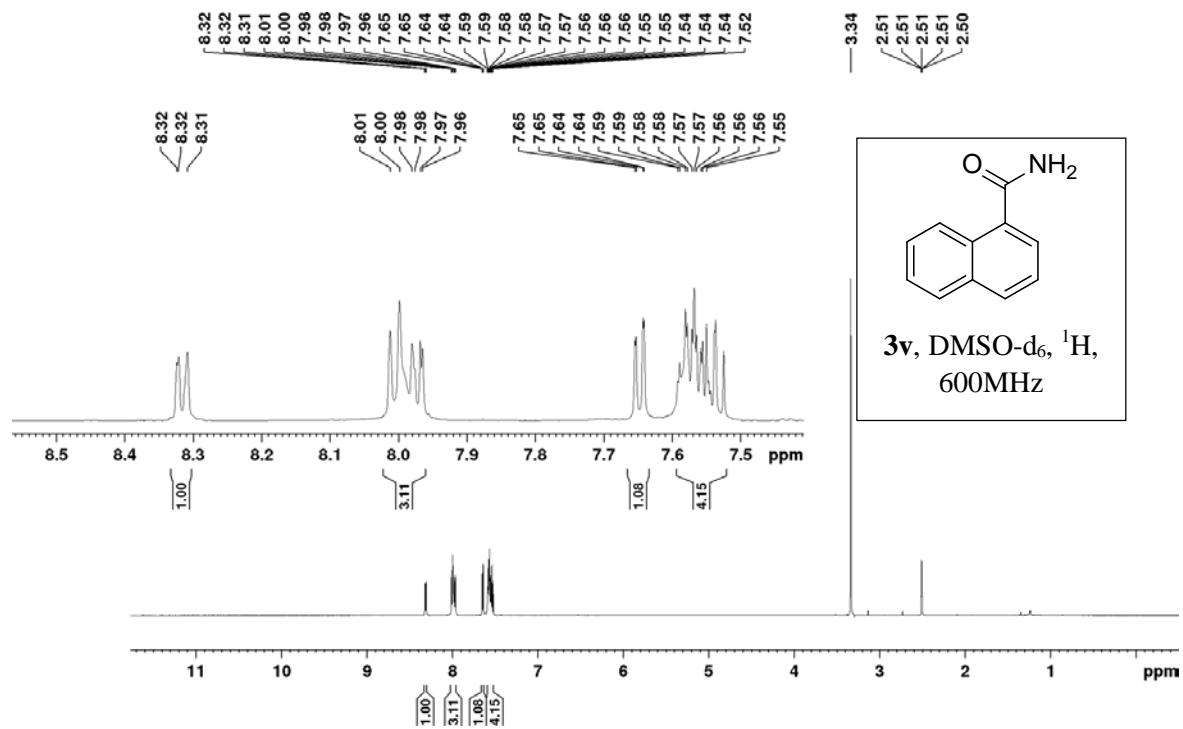

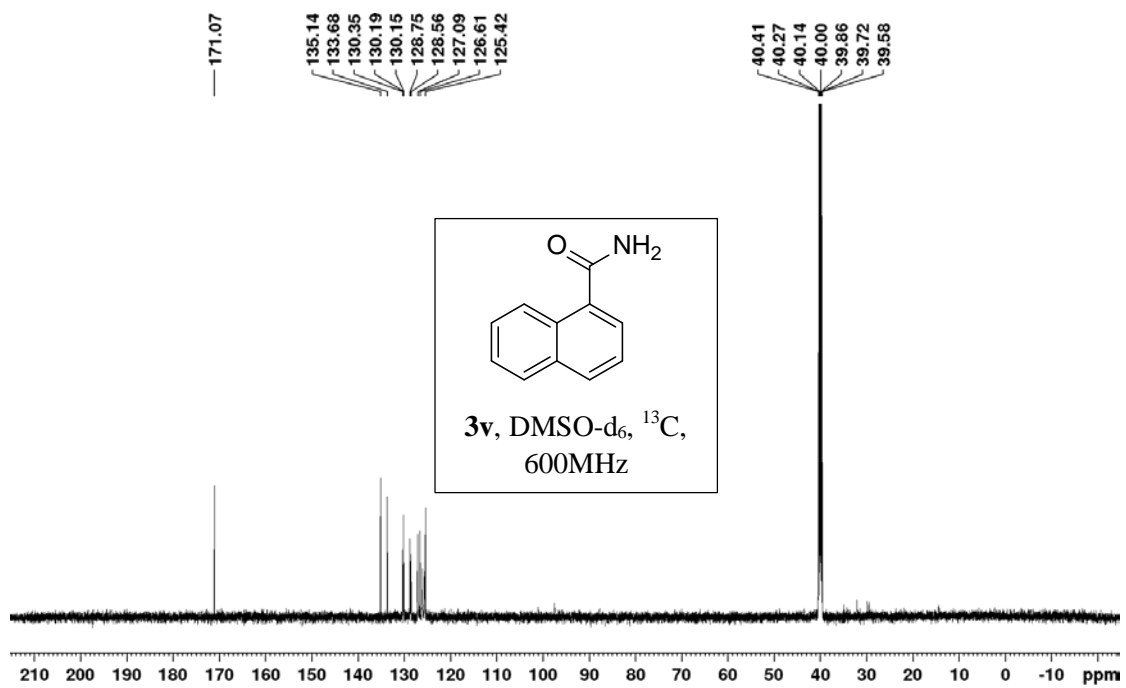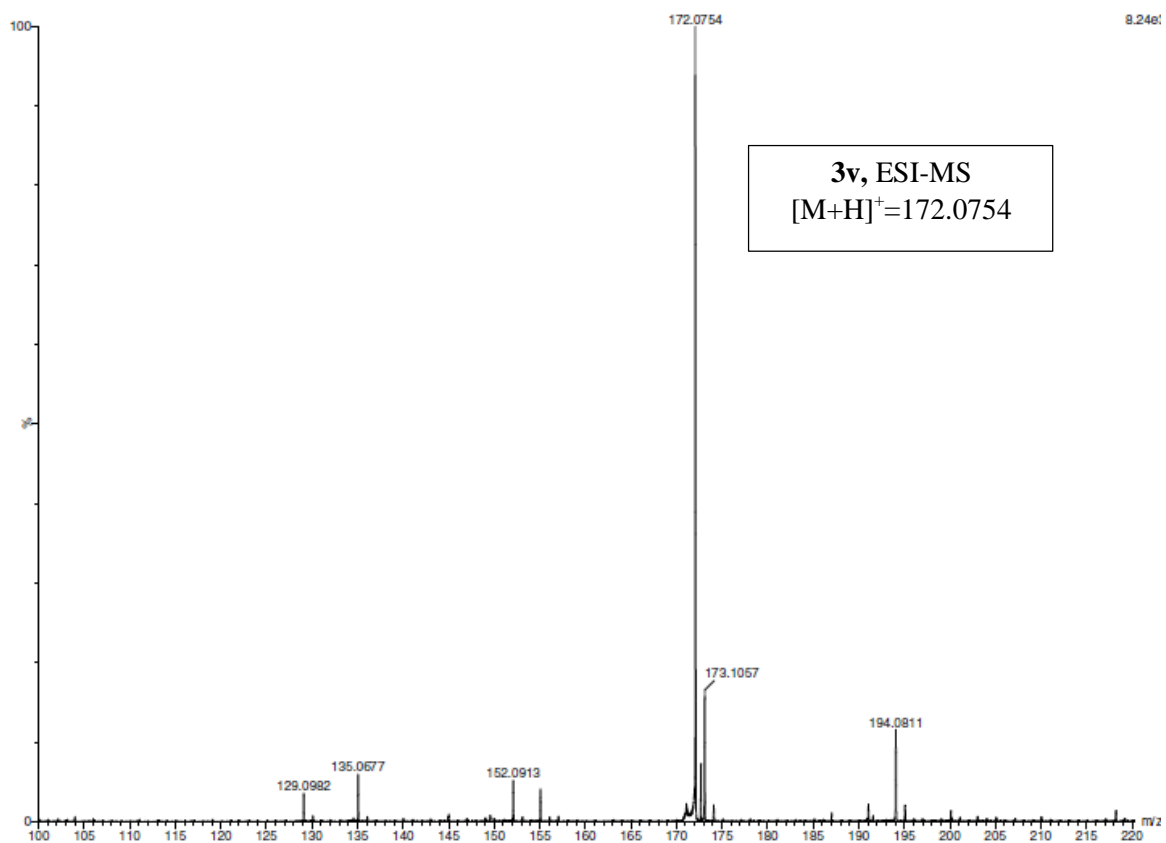

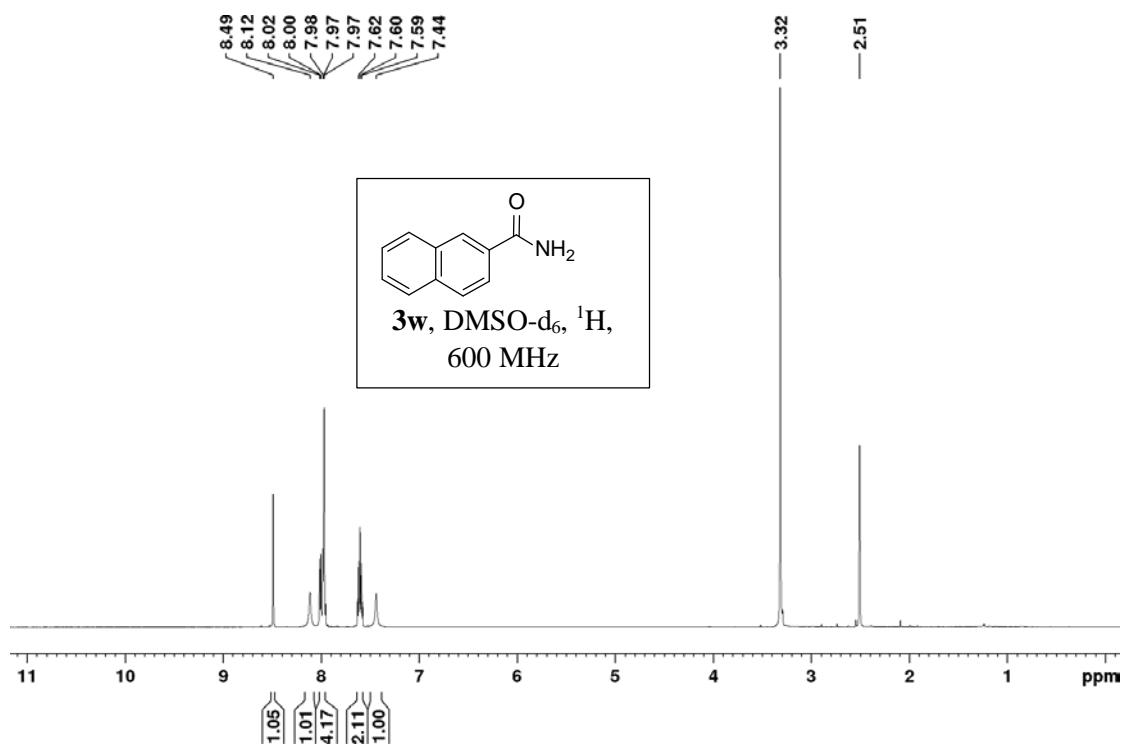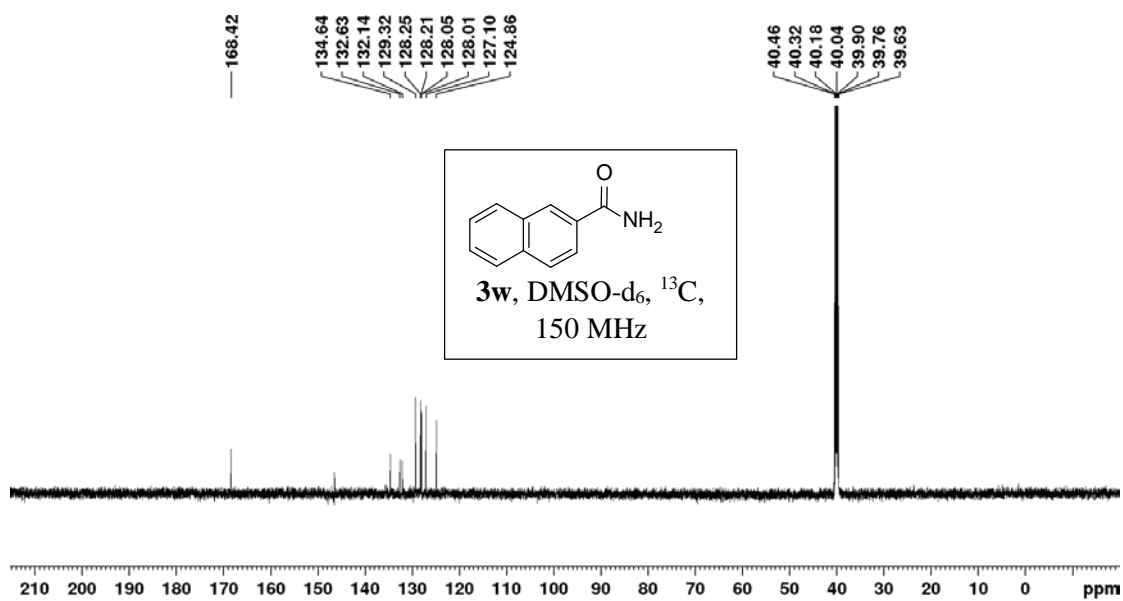



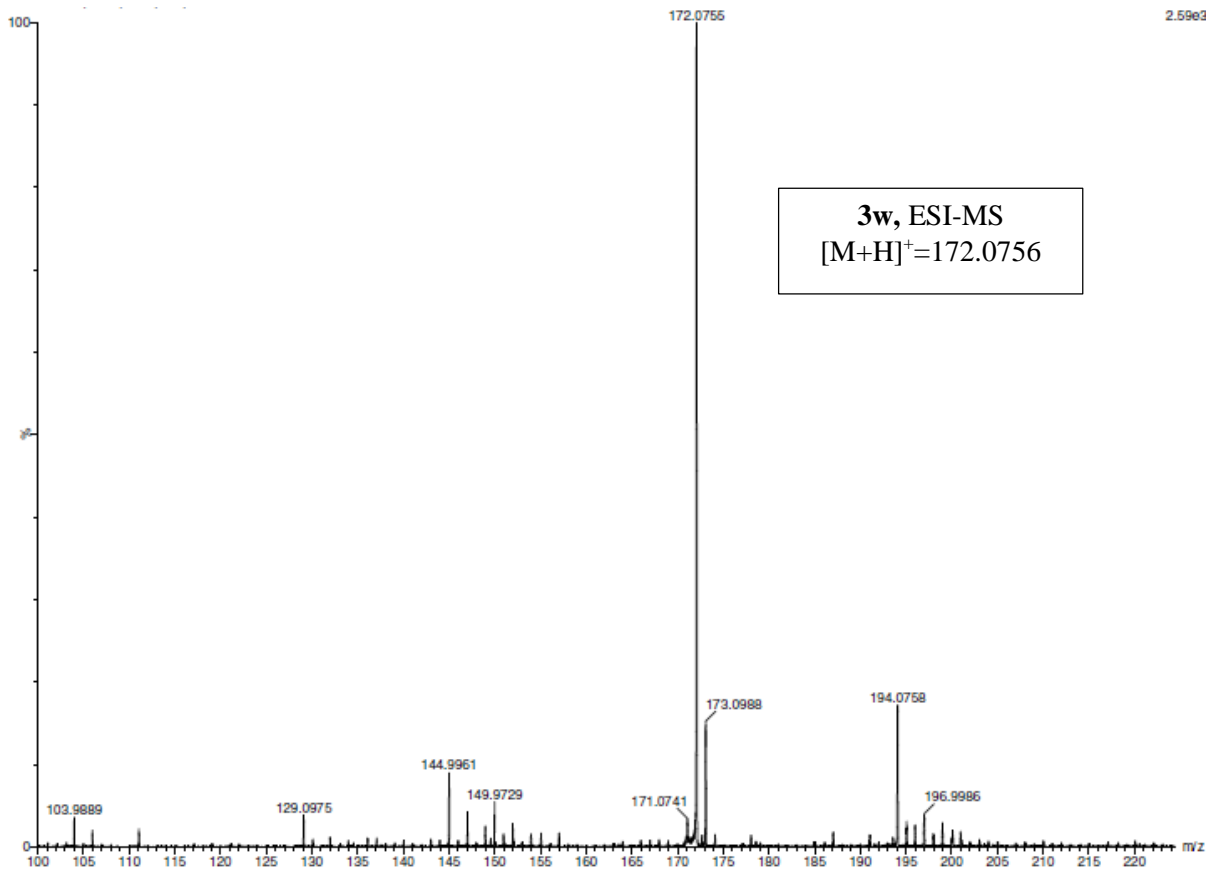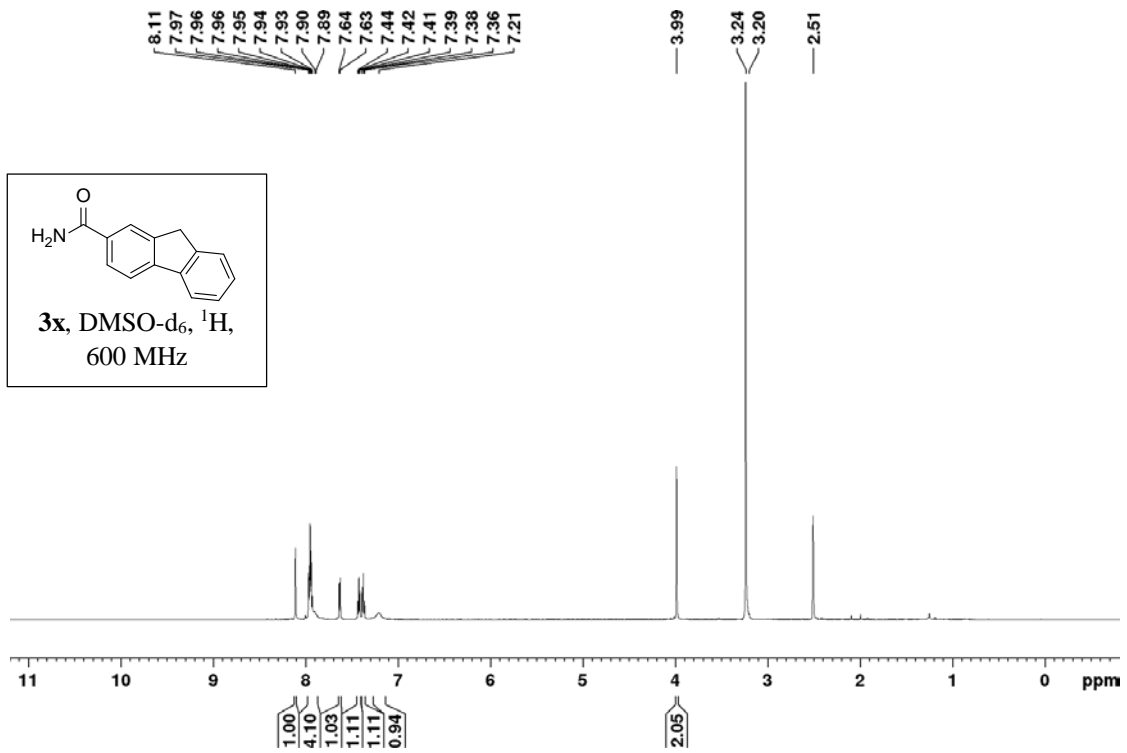

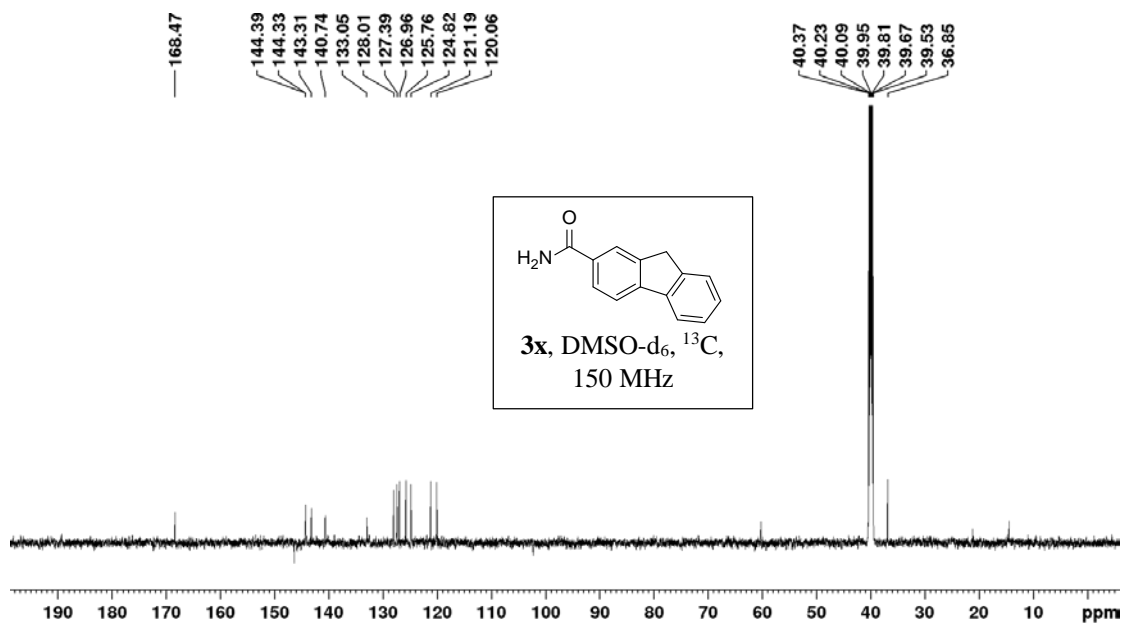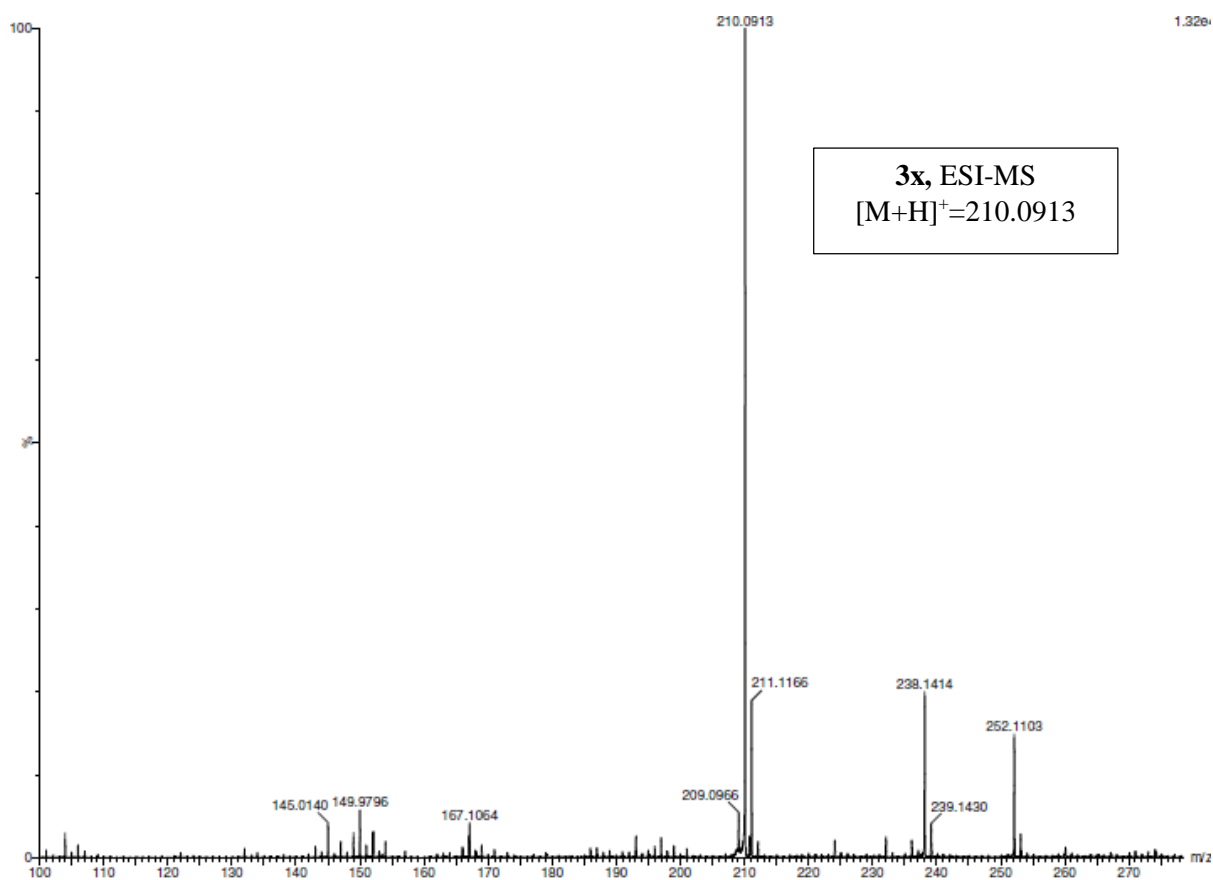

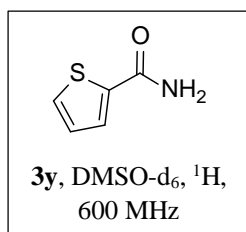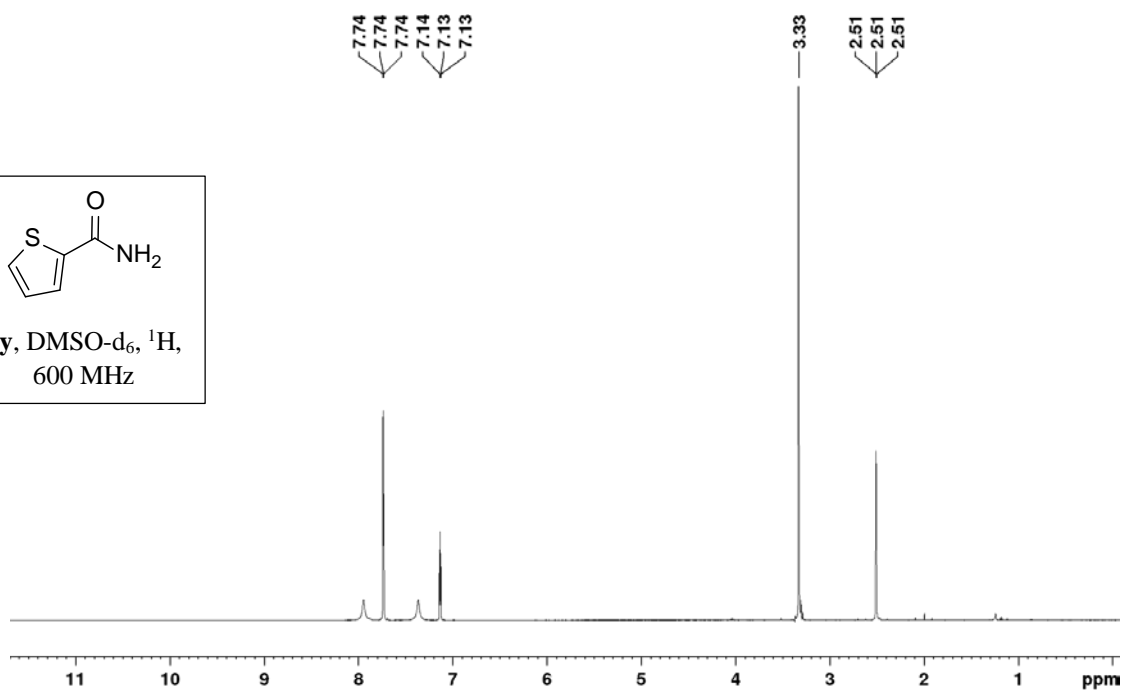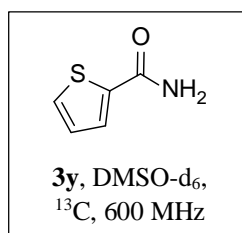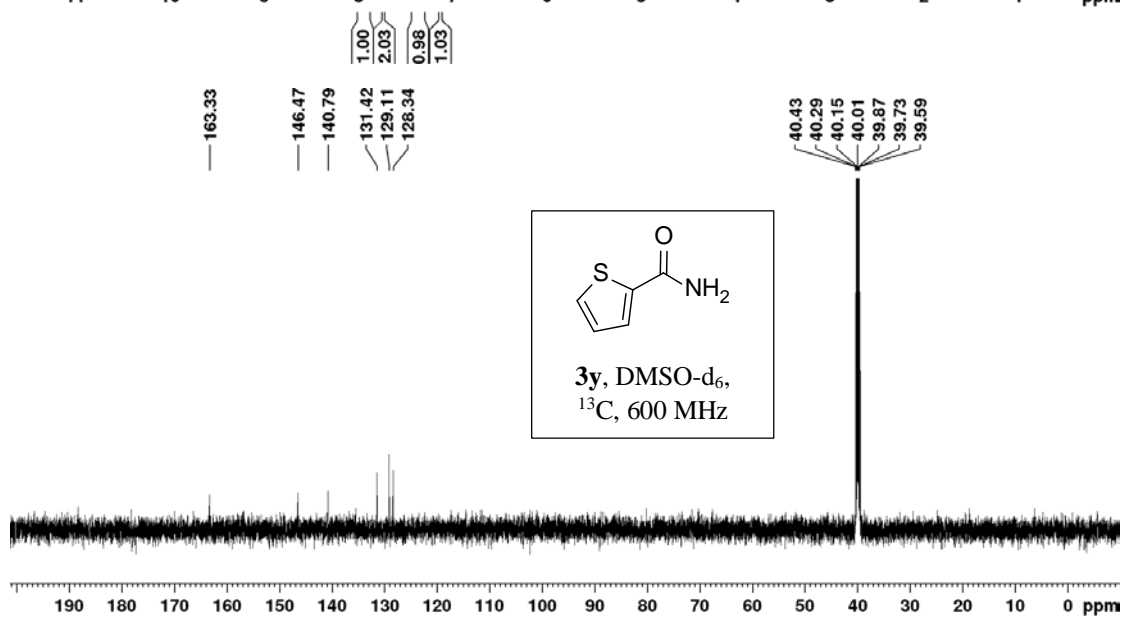

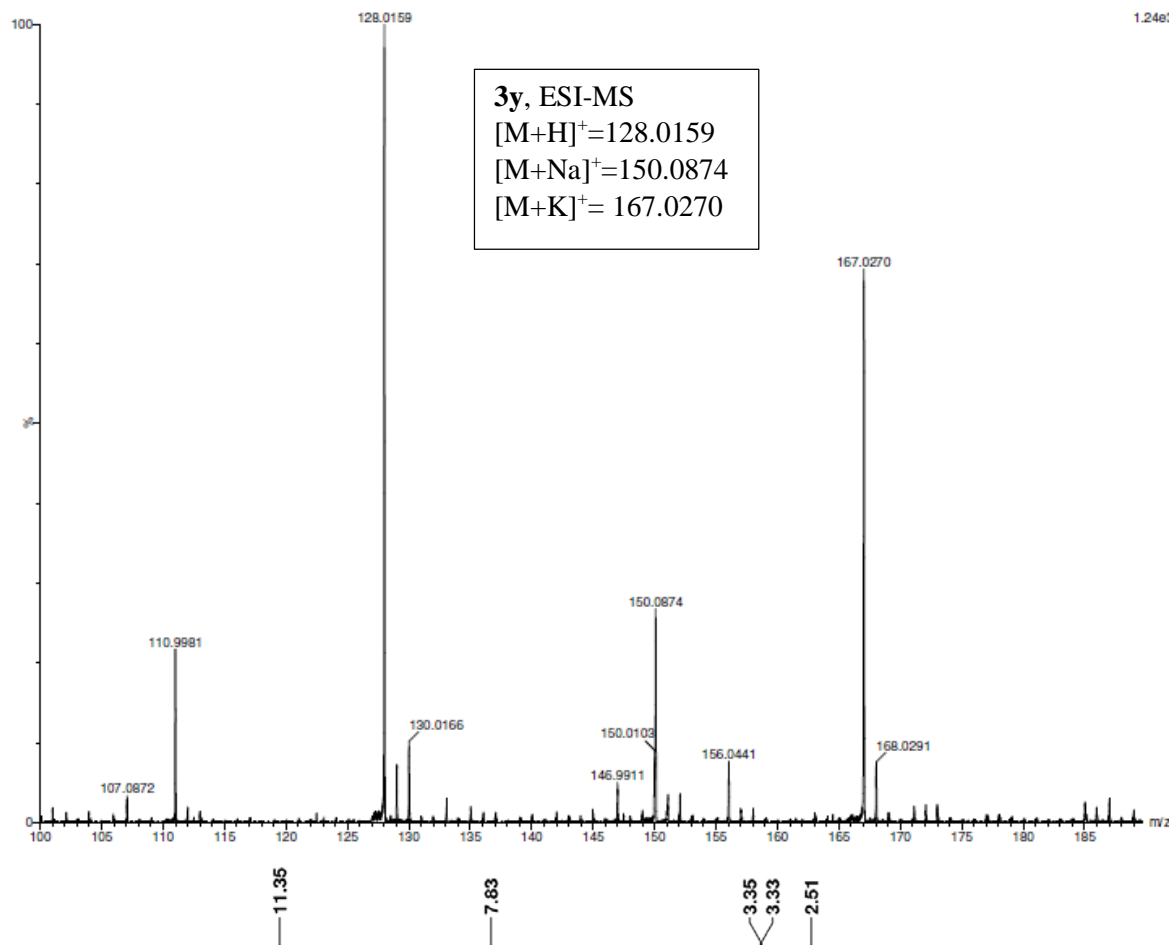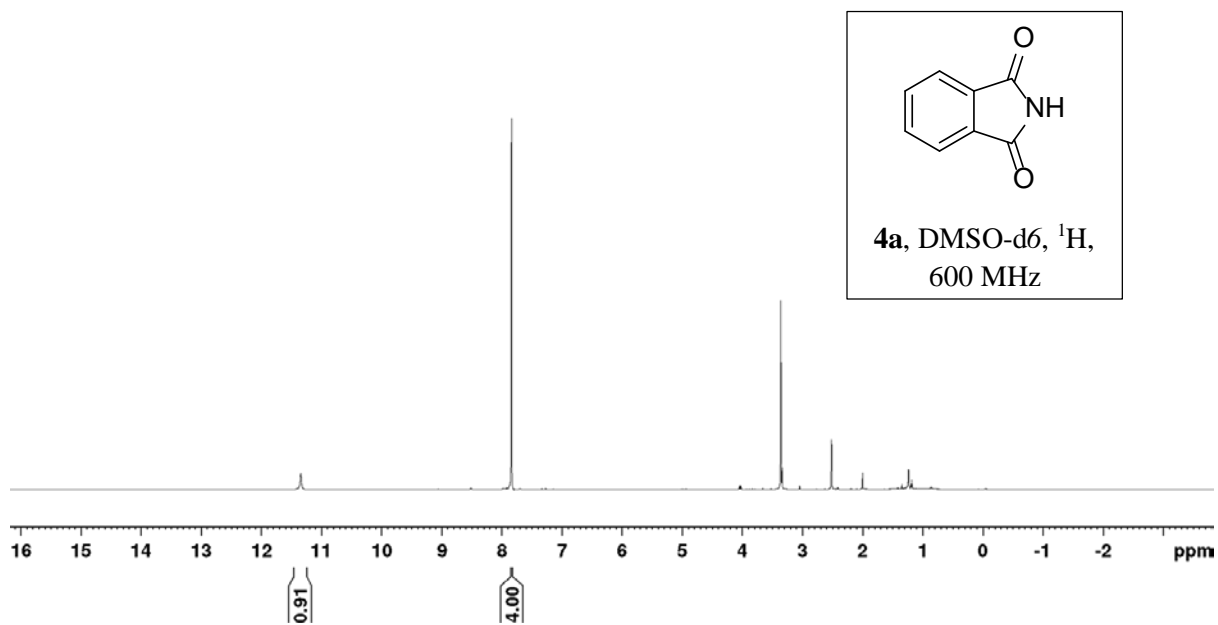

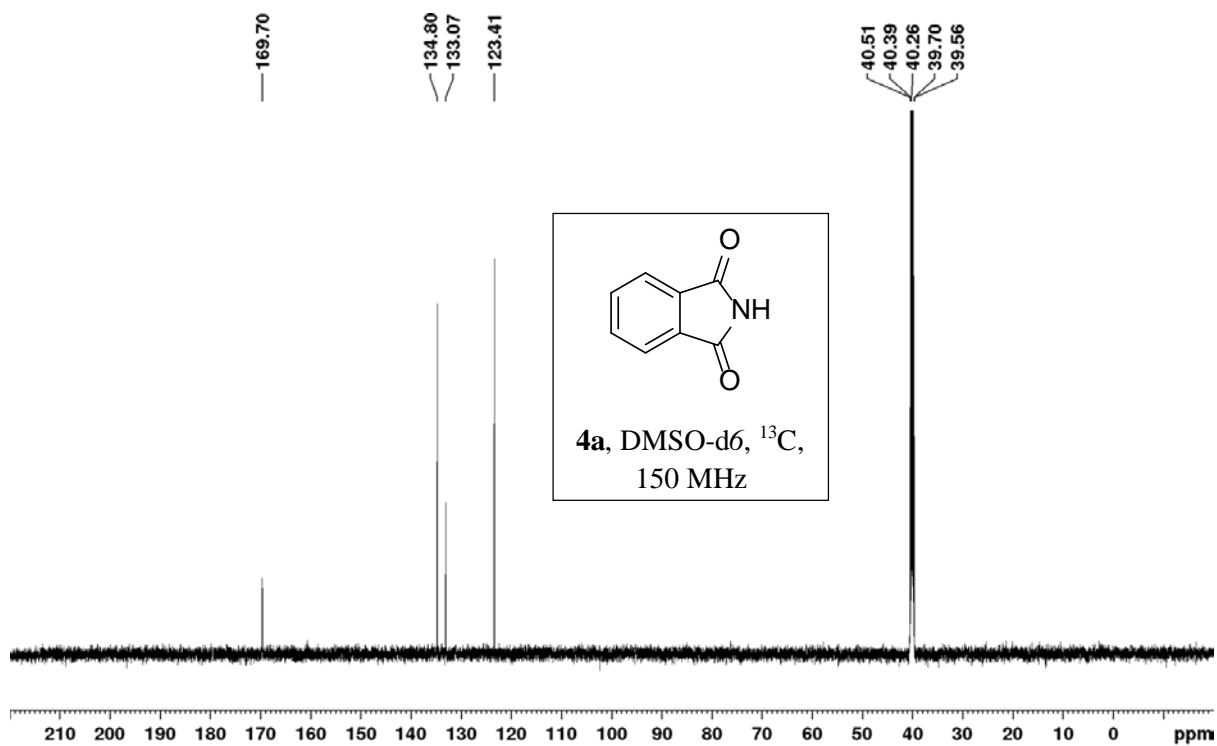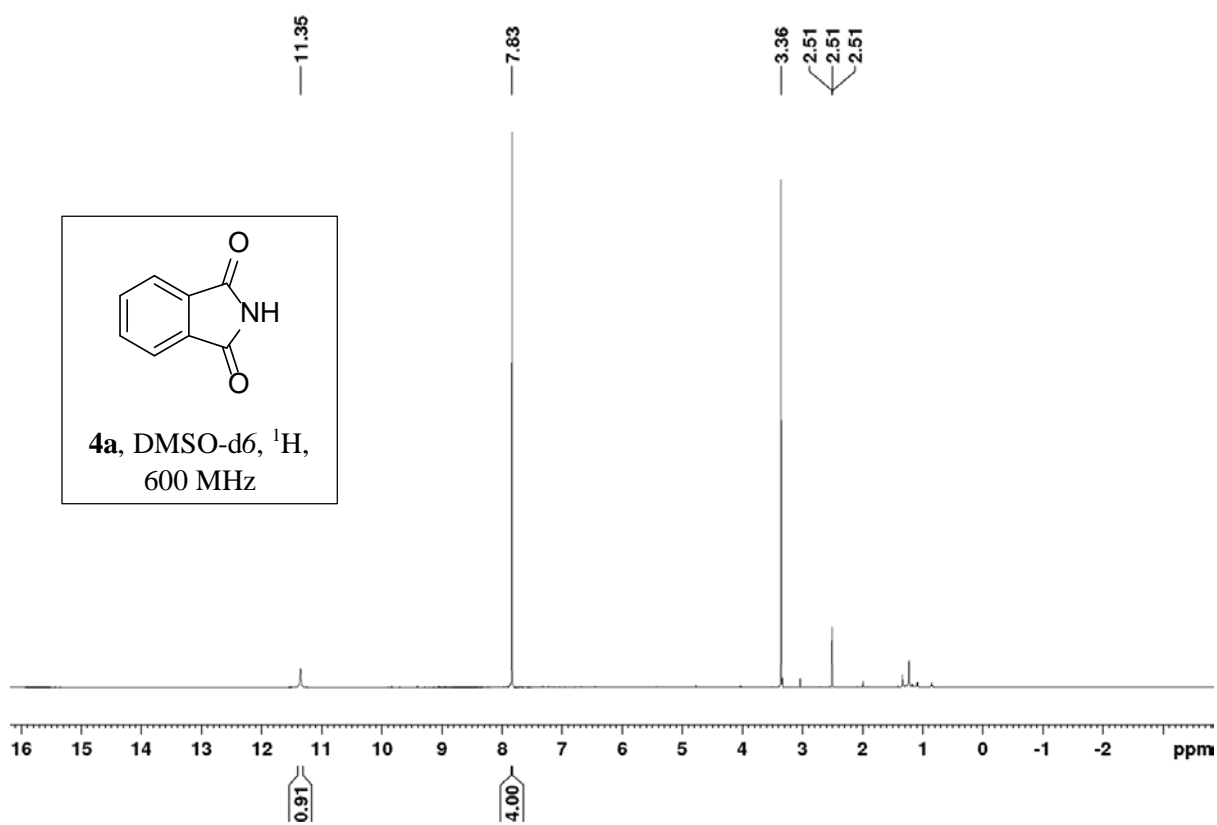

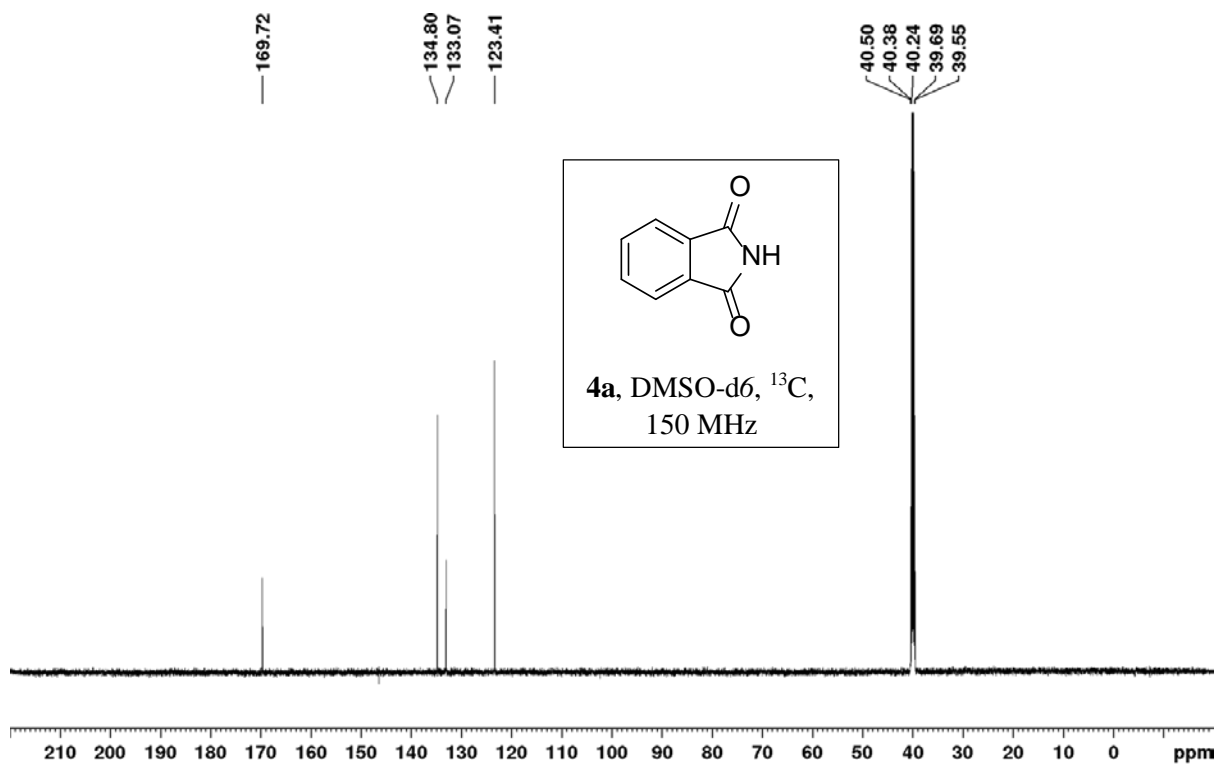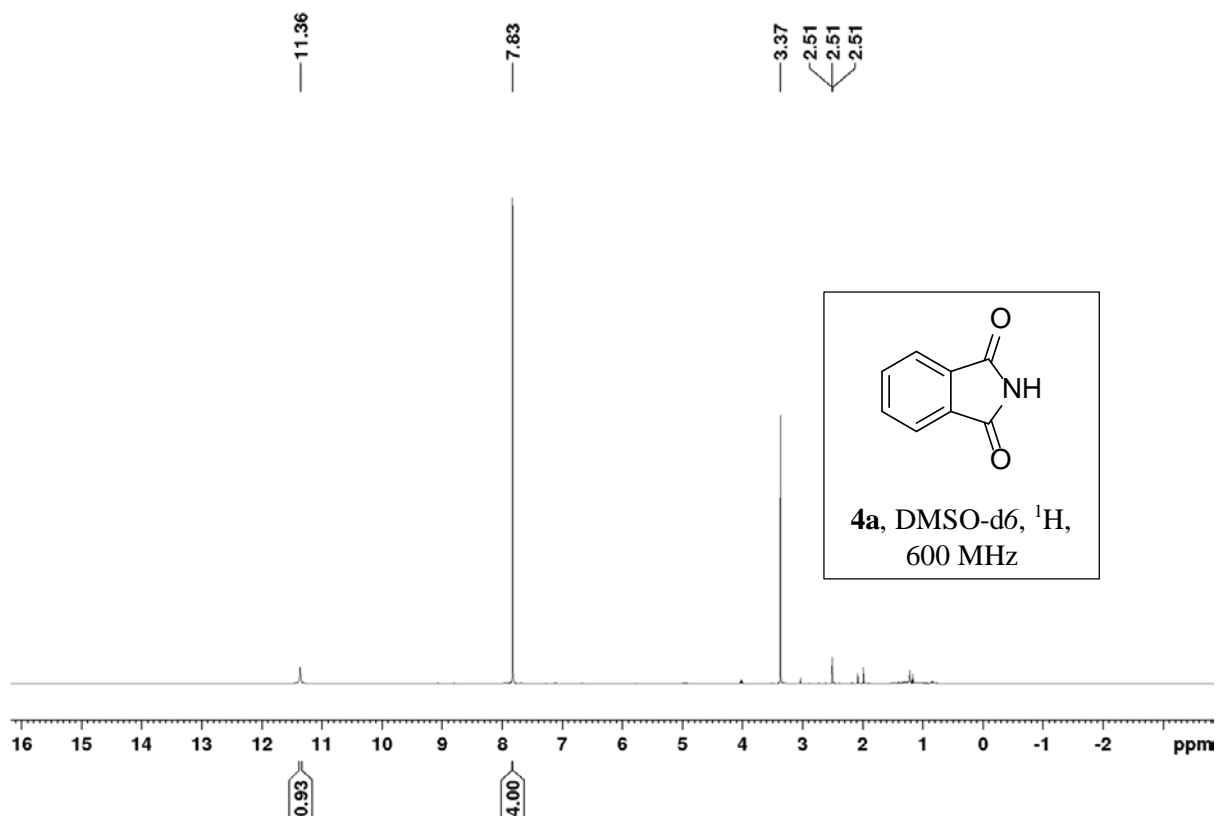

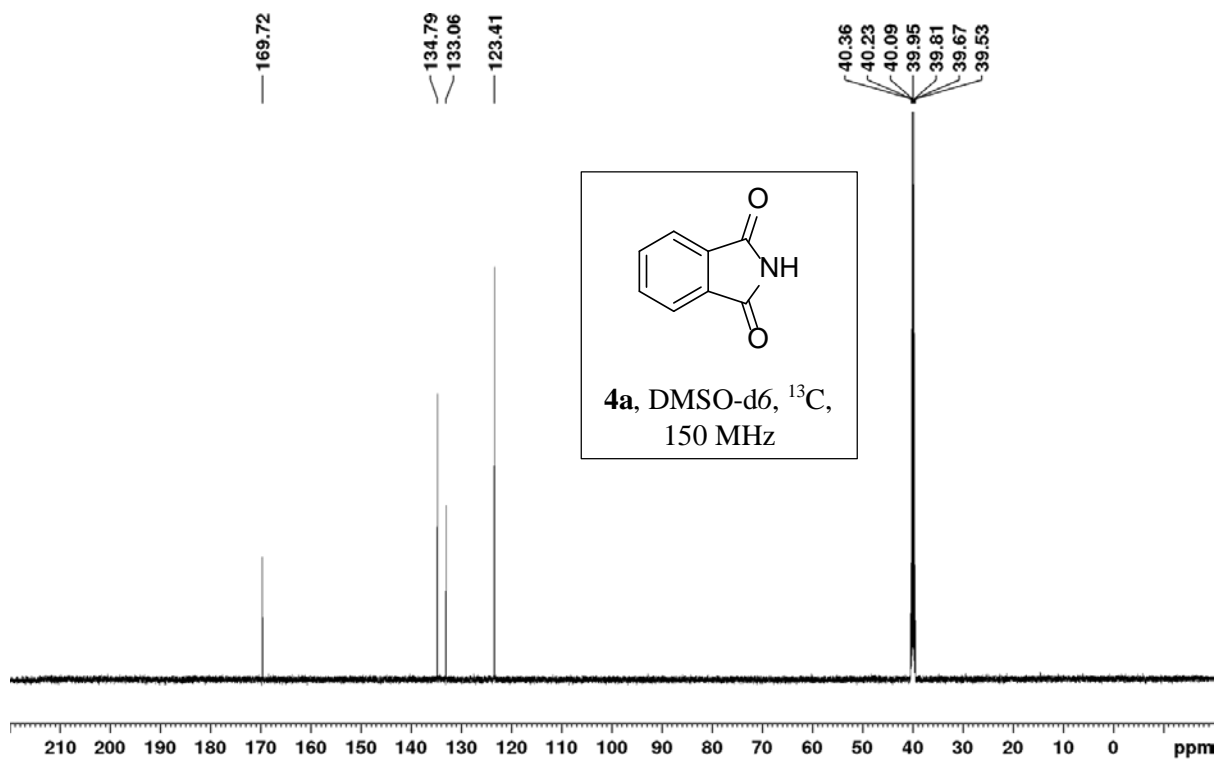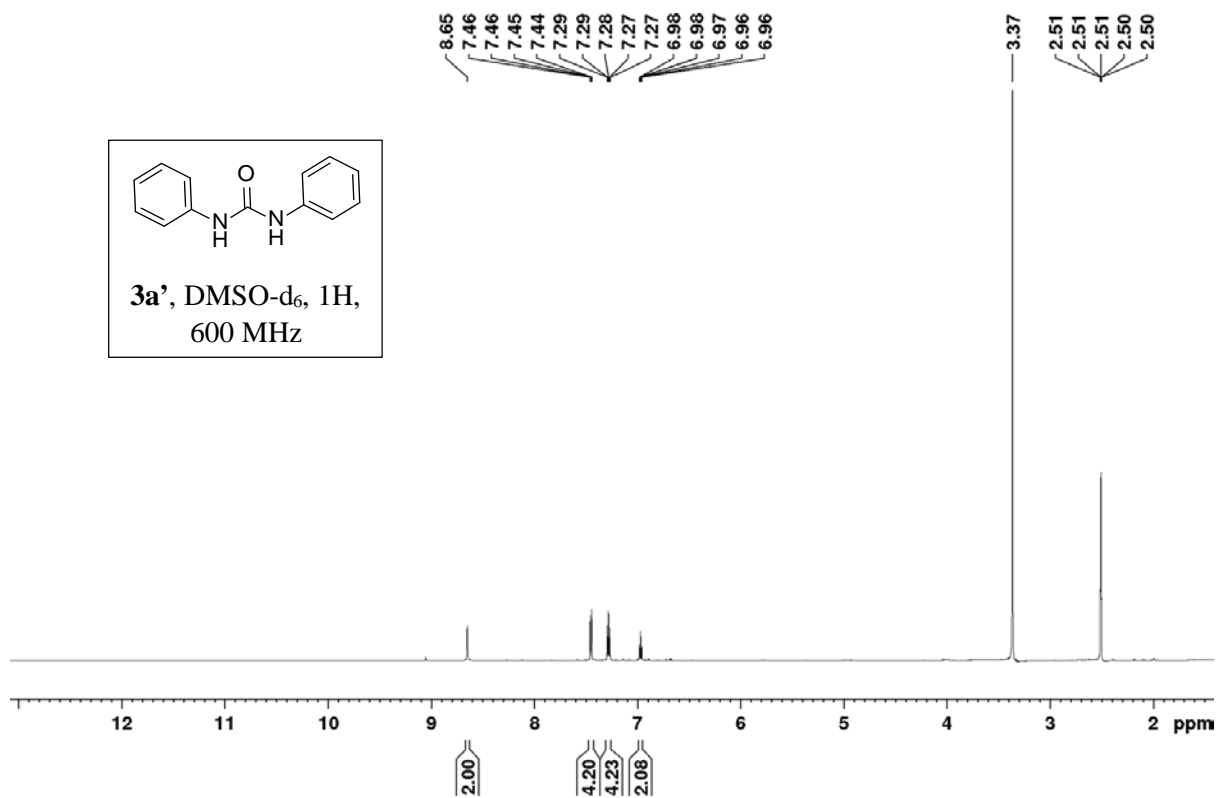

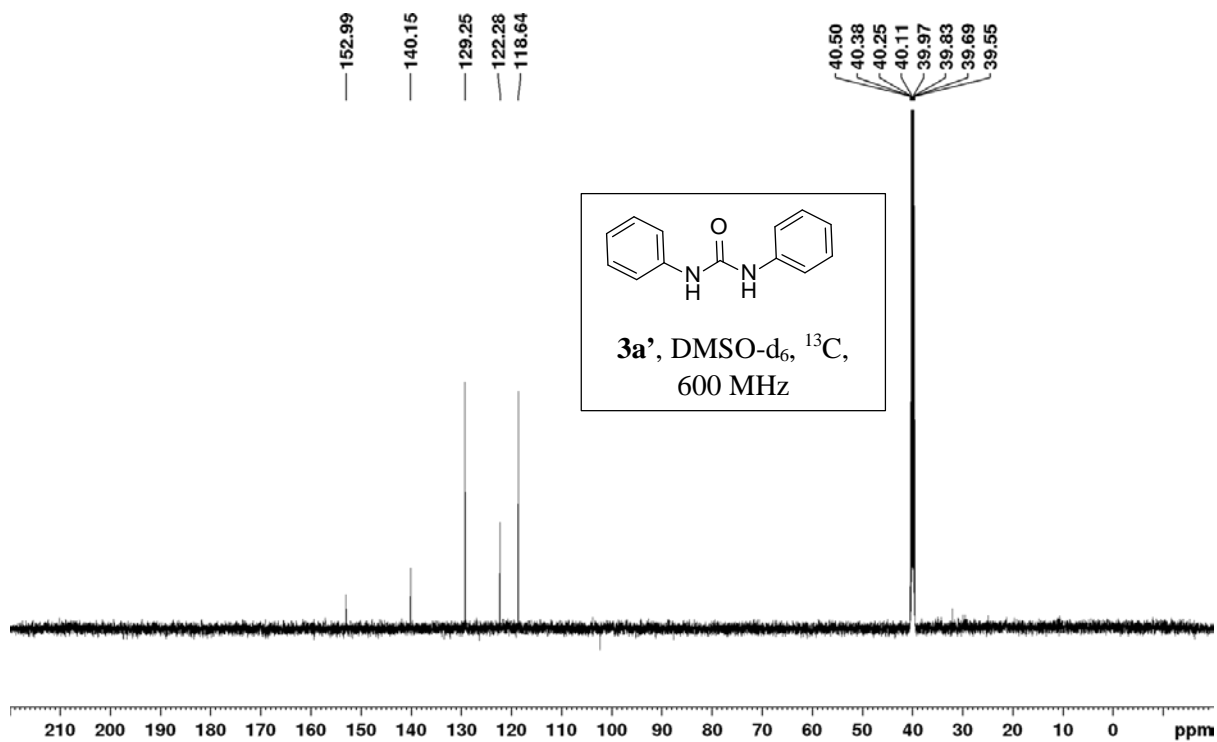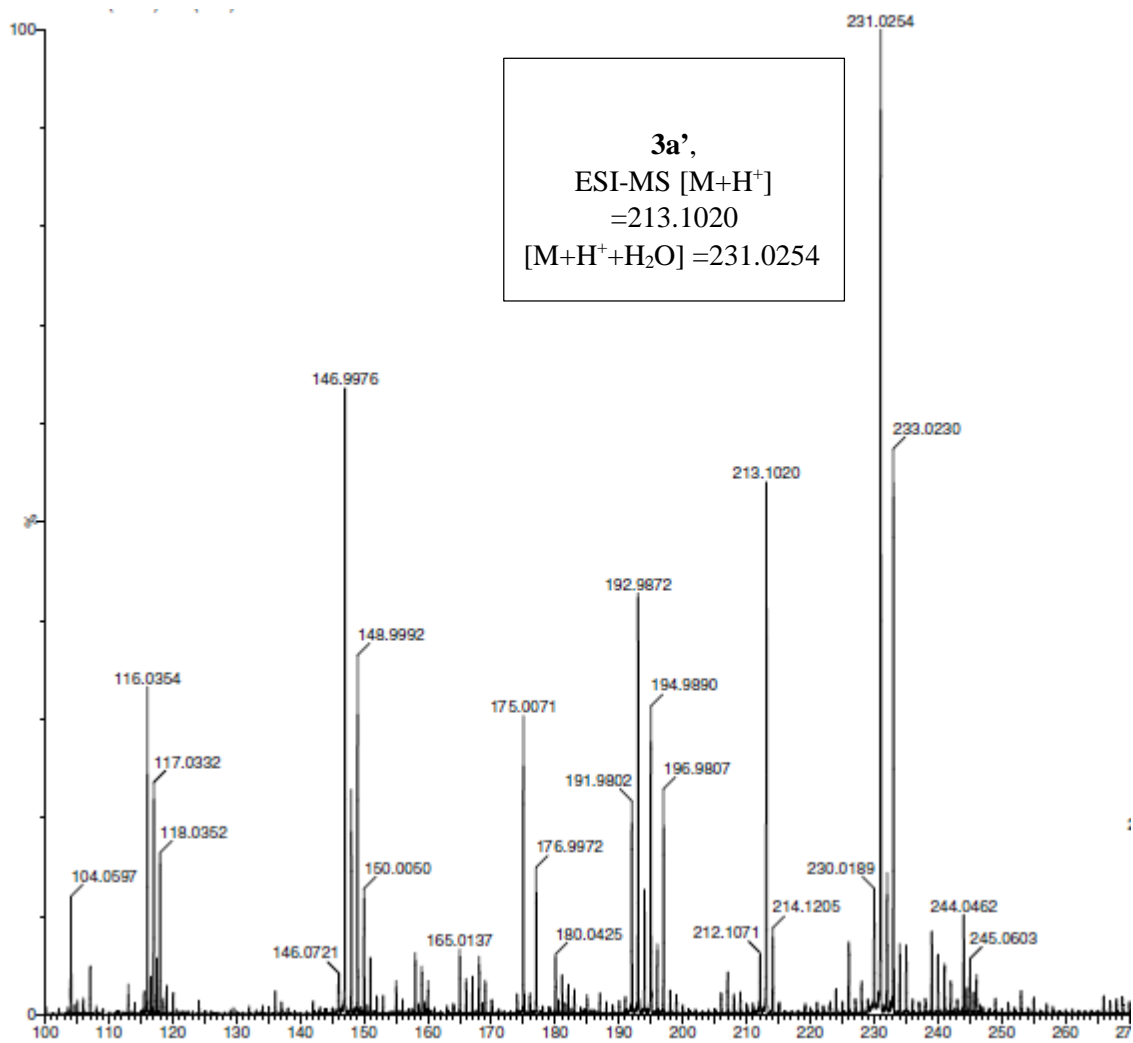



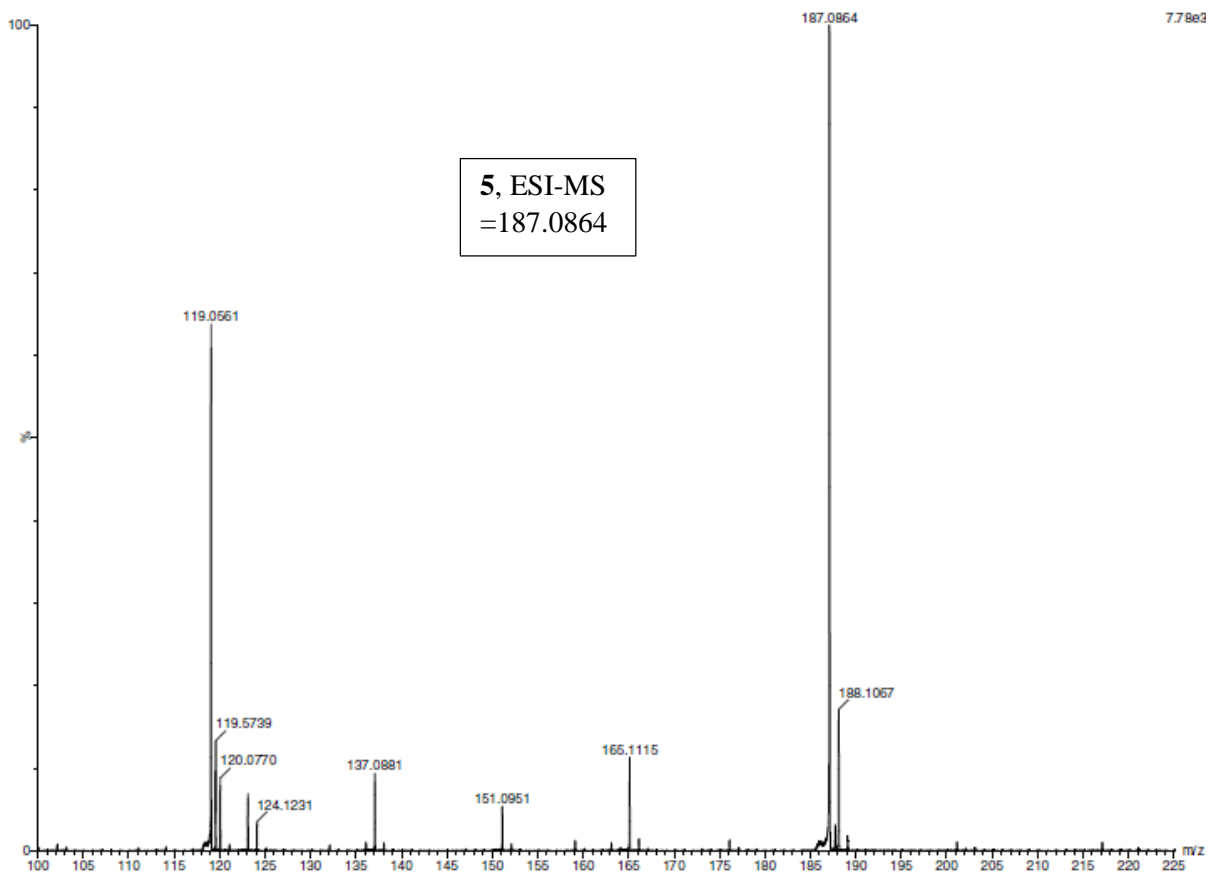

Supplement: d0ob01445a1.pdf [file d0ob01445a1.pdf]
